# Supplementary material for: Isolation and Identification of 12-Deoxyphorbol Esters from Euphorbia resinifera Berg Latex: Targeted and Biased Non-Targeted Identification of 12-Deoxyphorbol Esters by UHPLC-HRMSE
Source: MDPI journal article supplement (doi:10.3390/plants12223846), 2023-11-14
Supplement: s1 [file s1]

# **Isolation and identification of 12-deoxyphorbol esters from *Euphorbia resinifera* Berg latex. Targeted and biased non-targeted identification of 12-deoxyphorbol esters by UHPLC-HRMS<sup>E</sup>.**

Abdellah Ezzanad<sup>1,2</sup>, Carolina De los Reyes<sup>1,2</sup>, Antonio J. Macías-Sánchez<sup>1,2,\*</sup>, Rosario Hernández Galán<sup>1,2,\*</sup>

<sup>1</sup> *Departamento de Química Orgánica, Facultad de Ciencias, Campus Universitario Puerto Real, Universidad de Cádiz, 11510 Puerto Real, Cádiz, Spain*

<sup>2</sup> *Instituto de Investigación en Biomoléculas (INBIO), Universidad de Cádiz, 11510 Puerto Real, Cádiz, Spain*

## **Corresponding Authors**

**Antonio J. Macías-Sánchez** - *Departamento de Química Orgánica, Facultad de Ciencias, Campus Universitario Puerto Real, Universidad de Cádiz, 11510 Puerto Real, Cádiz, Spain; Instituto de Investigación en Biomoléculas (INBIO), Universidad de Cádiz, 11510 Puerto Real, Cádiz, Spain; <https://orcid.org/0000-0001-6002-4977>; Tel: +34956012704; E-mail: antoniojose.macias@uca.es*

**Rosario Hernández Galán** - *Departamento de Química Orgánica, Facultad de Ciencias, Campus Universitario Puerto Real, Universidad de Cádiz, 11510 Puerto Real, Cádiz, Spain; Instituto de Investigación en Biomoléculas (INBIO), Universidad de Cádiz, 11510 Puerto Real, Cádiz, Spain; <https://orcid.org/0000-0003-1887-4796>; Tel: +34956012771; E-mail: rosario.hernandez@uca.es*

## Supplementary Material

### Table of Contents

#### 1- NMR spectra

|                                                                                                                                                              |    |
|--------------------------------------------------------------------------------------------------------------------------------------------------------------|----|
| <b>Figure S1a.</b> $^1\text{H}$ NMR spectrum of DPPI ( <b>1</b> ) in $\text{CD}_3\text{OD}$ (600 MHz).....                                                   | 9  |
| <b>Figure S1b.</b> $^{13}\text{C}$ NMR spectrum of DPPI ( <b>1</b> ) in $\text{MeOD}$ (150 MHz).....                                                         | 9  |
| <b>Figure S2a.</b> $^1\text{H}$ -NMR spectrum DPPT ( <b>2</b> ) in $\text{CD}_3\text{OD}$ (500 MHz). ....                                                    | 10 |
| <b>Figure S2b.</b> $^{13}\text{C}$ -NMR spectrum of DPPT ( <b>2</b> ) in $\text{CD}_3\text{OD}$ (150 MHz).....                                               | 10 |
| <b>Figure S3a.</b> $^1\text{H}$ -NMR spectrum of DPPBz ( <b>3</b> ) in $\text{CD}_3\text{OD}$ (400 MHz).....                                                 | 11 |
| <b>Figure S3b.</b> $^{13}\text{C}$ -NMR spectrum of DPPBz ( <b>3</b> ) in $\text{CD}_3\text{OD}$ (100 MHz).....                                              | 11 |
| <b>Figure S3c.</b> COSY spectrum of DPPBz ( <b>3</b> ) in $\text{CD}_3\text{OD}$ .....                                                                       | 12 |
| <b>Figure S3d.</b> HSQC spectrum of DPPBz ( <b>3</b> ) in $\text{CD}_3\text{OD}$ . ....                                                                      | 12 |
| <b>Figure S3e.</b> Expansion ( $\delta_{\text{H}}$ 4.7-0.6, $\delta_{\text{C}}$ 80-2) of HSQC spectrum of DPPBz ( <b>3</b> ) in $\text{CD}_3\text{OD}$ ..... | 13 |
| <b>Figure S3f.</b> Expansion ( $\delta_{\text{H}}$ 8.3-5.4, $\delta_{\text{C}}$ 162-120) of HSQC spectrum of <b>3</b> in $\text{CD}_3\text{OD}$ .....        | 13 |
| <b>Figure S3g.</b> HMBC spectrum of DPPBz ( <b>3</b> ) in $\text{CD}_3\text{OD}$ .....                                                                       | 14 |
| <b>Figure S3h.</b> Expansion ( $\delta_{\text{H}}$ 8.9-0.2, $\delta_{\text{C}}$ 218-119) of HMBC spectrum of <b>3</b> in $\text{CD}_3\text{OD}$ .....        | 14 |
| <b>Figure S3i.</b> Expansion ( $\delta_{\text{H}}$ 8.4-0.4, $\delta_{\text{C}}$ 82-5) of HMBC spectrum of DPPBz ( <b>3</b> ) in $\text{CD}_3\text{OD}$ ..... | 15 |
| <b>Figure S3j.</b> NOESY2D spectrum of DPPBz ( <b>3</b> ) in $\text{CD}_3\text{OD}$ .....                                                                    | 15 |
| <b>Figure S4a.</b> $^1\text{H}$ -NMR spectrum of AcDPPI ( <b>4</b> ) in $\text{CD}_3\text{OD}$ . (400 MHz) ....                                              | 16 |
| <b>Figure S4b.</b> $^{13}\text{C}$ -NMR spectrum of AcDPPI ( <b>4</b> ) in $\text{CD}_3\text{OD}$ . (100 MHz).....                                           | 16 |
| <b>Figure S4c.</b> COSY spectrum of AcDPPI ( <b>4</b> ) in $\text{CD}_3\text{OD}$ . ....                                                                     | 17 |
| <b>Figure S4d.</b> HSQC spectrum of AcDPPI ( <b>4</b> ) in $\text{CD}_3\text{OD}$ .....                                                                      | 17 |
| <b>Figure S4e.</b> Expansion ( $\delta_{\text{H}}$ 4.7-0.5, $\delta_{\text{C}}$ 77-2) of HSQC spectrum of AcDPPI ( <b>4</b> ) in $\text{CD}_3\text{OD}$ .... | 18 |
| <b>Figure S4f.</b> Expansion ( $\delta_{\text{H}}$ 4.7-0.5, $\delta_{\text{C}}$ 77-2) of HSQC spectrum of AcDPPI ( <b>4</b> ) in $\text{CD}_3\text{OD}$ .... | 18 |
| <b>Figure S4g.</b> HMBC spectrum of AcDPPI ( <b>4</b> ) in $\text{CD}_3\text{OD}$ .....                                                                      | 19 |
| <b>Figure S4h.</b> Expansion ( $\delta_{\text{H}}$ 8.0-0.4, $\delta_{\text{C}}$ 91-5) of HMBC spectrum of AcDPPI ( <b>4</b> ) in $\text{CD}_3\text{OD}$ ...  | 19 |
| <b>Figure S4i.</b> Expansion ( $\delta_{\text{H}}$ 8.0-0.4, $\delta_{\text{C}}$ 220-120) of HMBC spectrum of <b>4</b> in $\text{CD}_3\text{OD}$ .....        | 20 |
| <b>Figure S4j.</b> NOESY2D spectrum of AcDPPI ( <b>4</b> ) in $\text{CD}_3\text{OD}$ .. ....                                                                 | 20 |
| <b>Figure S5a.</b> $^1\text{H}$ NMR spectrum of AcDPPT ( <b>5</b> ) in $\text{CD}_3\text{OD}$ (400 MHz).....                                                 | 21 |
| <b>Figure S5b.</b> $^{13}\text{C}$ NMR spectrum of AcDPPT ( <b>5</b> ) in $\text{CD}_3\text{OD}$ (100 MHz). ....                                             | 21 |
| <b>Figure S5c.</b> COSY spectrum of AcDPPT ( <b>5</b> ) in $\text{CD}_3\text{OD}$ . ....                                                                     | 22 |
| <b>Figure S5d.</b> HSQC spectrum of AcDPPT ( <b>5</b> ) in $\text{CD}_3\text{OD}$ .....                                                                      | 22 |
| <b>Figure S5e.</b> Expansion ( $\delta_{\text{H}}$ 4.7-0.5, $\delta_{\text{C}}$ 78-4) of HSQC spectrum of AcDPPT ( <b>5</b> ) in $\text{CD}_3\text{OD}$ . .. | 23 |
| <b>Figure S5f.</b> Expansion ( $\delta_{\text{H}}$ 7.9-5.0, $\delta_{\text{C}}$ 165-120) of HSQC spectrum of <b>5</b> in $\text{CD}_3\text{OD}$ .....        | 23 |
| <b>Figure S5g.</b> HMBC spectrum of AcDPPT ( <b>5</b> ) in $\text{CD}_3\text{OD}$ .....                                                                      | 24 |
| <b>Figure S5h.</b> Expansion ( $\delta_{\text{H}}$ 8.5-0.5, $\delta_{\text{C}}$ 80-2) of HMBC spectrum of <b>5</b> in $\text{CD}_3\text{OD}$ .....           | 24 |
| <b>Figure S5i.</b> Expansion ( $\delta_{\text{H}}$ 8.5-0.5, $\delta_{\text{C}}$ 215-120) of HMBC spectrum of <b>5</b> in $\text{CD}_3\text{OD}$ .....        | 25 |
| <b>Figure S5j.</b> NOESY2D spectrum of AcDPPT ( <b>5</b> ) in $\text{CD}_3\text{OD}$ . ....                                                                  | 25 |
| <b>Figure S6a.</b> $^1\text{H}$ -NMR spectrum of AcDPPBz ( <b>6</b> ) in $\text{CD}_3\text{OD}$ (400 MHz). ....                                              | 26 |
| <b>Figure S6b.</b> $^{13}\text{C}$ -NMR spectrum of AcDPPBz ( <b>6</b> ) in $\text{CD}_3\text{OD}$ (125 MHz).....                                            | 26 |
| <b>Figure S6c.</b> COSY spectrum of AcDPPBz ( <b>6</b> ) in $\text{CD}_3\text{OD}$ . ....                                                                    | 27 |

## Supplementary Material

|                                                                                                                                                    |    |
|----------------------------------------------------------------------------------------------------------------------------------------------------|----|
| <b>Figure S6d.</b> HSQC spectrum of AcDPPBz ( <b>6</b> ) in CD <sub>3</sub> OD.....                                                                | 27 |
| <b>Figure S6e.</b> Expansion ( $\delta_{\text{H}}$ 4.7-0.6, $\delta_{\text{C}}$ 80-4) of HSQC spectrum of <b>6</b> in CD <sub>3</sub> OD.....      | 28 |
| <b>Figure S6f.</b> Expansion ( $\delta_{\text{H}}$ 8.5-5.5, $\delta_{\text{C}}$ 165-123) of HSQC spectrum of <b>6</b> in CD <sub>3</sub> OD.....   | 28 |
| <b>Figure S6g.</b> HMBC spectrum of AcDPPBz ( <b>6</b> ) in CD <sub>3</sub> OD.....                                                                | 29 |
| <b>Figure S6h.</b> Expansion ( $\delta_{\text{H}}$ 8.3-0.5, $\delta_{\text{C}}$ 80-3) of HMBC spectrum of <b>6</b> in CD <sub>3</sub> OD.....      | 29 |
| <b>Figure S6i.</b> Expansion ( $\delta_{\text{H}}$ 9.0-0.5, $\delta_{\text{C}}$ 215-120) of HMBC spectrum of <b>6</b> in CD <sub>3</sub> OD.....   | 30 |
| <b>Figure S6j.</b> NOESY2D spectrum of AcDPPBz ( <b>6</b> ) in CD <sub>3</sub> OD. ....                                                            | 30 |
| <b>Figure S7a.</b> <sup>1</sup> H-NMR spectrum of DPB ( <b>7</b> ) in CDCl <sub>3</sub> (400 MHz).....                                             | 31 |
| <b>Figure S7b.</b> <sup>13</sup> C-NMR spectrum of DPB ( <b>7</b> ) in CDCl <sub>3</sub> (400 MHz).....                                            | 31 |
| <b>Figure S8a.</b> <sup>1</sup> H-NMR spectrum of DPA ( <b>8</b> ) in CDCl <sub>3</sub> (400 MHz).....                                             | 32 |
| <b>Figure S8b.</b> <sup>13</sup> C-NMR spectrum of DPA ( <b>8</b> ) in CDCl <sub>3</sub> (100 MHz). ....                                           | 32 |
| <b>Figure S9a.</b> <sup>1</sup> H-NMR spectrum of DPP ( <b>9</b> ) in CDCl <sub>3</sub> (400 MHz). ....                                            | 33 |
| <b>Figure S9b.</b> <sup>13</sup> C NMR spectrum of DPP ( <b>9</b> ) in CDCl <sub>3</sub> (100 MHz). ....                                           | 33 |
| <b>Figure S10a.</b> <sup>1</sup> H-NMR spectrum of AcDPB ( <b>10</b> ) in CD <sub>3</sub> OD (400 MHz). ....                                       | 34 |
| <b>Figure S10b.</b> <sup>13</sup> C-NMR spectrum of AcDPB ( <b>10</b> ) in CD <sub>3</sub> OD (100 MHz).....                                       | 34 |
| <b>Figure S11a.</b> <sup>1</sup> H-NMR spectrum of AcDPA ( <b>11</b> ) in CD <sub>3</sub> OD (400 MHz) . ....                                      | 35 |
| <b>Figure S11b.</b> <sup>13</sup> C-NMR spectrum of AcDPA ( <b>11</b> ) in CD <sub>3</sub> OD (100 MHz).....                                       | 35 |
| <b>Figure S12a.</b> <sup>1</sup> H-NMR spectrum of AcDPP ( <b>12</b> ) in CD <sub>3</sub> OD (400 MHz).....                                        | 36 |
| <b>Figure S12b.</b> <sup>13</sup> C-NMR spectrum of AcDPP ( <b>12</b> ) in CD <sub>3</sub> OD (100 MHz). ....                                      | 36 |
| <b>Figure S13a.</b> <sup>1</sup> H-NMR spectrum of AcDPiPn ( <b>13</b> ) in CD <sub>3</sub> OD (500 MHz).....                                      | 37 |
| <b>Figure S13b.</b> <sup>13</sup> C-NMR spectrum of AcDPiPn ( <b>13</b> ) in CD <sub>3</sub> OD (125 MHz). ....                                    | 37 |
| <b>Figure S13c.</b> COSY spectrum of AcDPiPn ( <b>13</b> ) in CD <sub>3</sub> OD.....                                                              | 38 |
| <b>Figure S13d.</b> HSQC spectrum of AcDPiPn ( <b>13</b> ) in CD <sub>3</sub> OD. ....                                                             | 38 |
| <b>Figure S13e.</b> Expansion ( $\delta_{\text{H}}$ 3.8-0.2, $\delta_{\text{C}}$ 62-3) of HSQC spectrum of <b>13</b> in CD <sub>3</sub> OD.....    | 39 |
| <b>Figure S13f.</b> Expansion ( $\delta_{\text{H}}$ 7.8-4.2, $\delta_{\text{C}}$ 170-65) of HSQC spectrum of <b>13</b> in CD <sub>3</sub> OD.....  | 39 |
| <b>Figure S13g.</b> HMBC spectrum of AcDPiPn ( <b>13</b> ) in CD <sub>3</sub> OD. ....                                                             | 40 |
| <b>Figure S13h.</b> Expansion ( $\delta_{\text{H}}$ 8.7-0.2, $\delta_{\text{C}}$ 90-3) of HMBC spectrum of <b>13</b> in CD <sub>3</sub> OD.....    | 40 |
| <b>Figure S13i.</b> Expansion ( $\delta_{\text{H}}$ 8.7-0.2, $\delta_{\text{C}}$ 215-128) of HMBC spectrum of <b>13</b> in CD <sub>3</sub> OD..... | 41 |
| <b>Figure S13j.</b> NOESY2D spectrum of AcDPiPn ( <b>13</b> ) in CD <sub>3</sub> OD. ....                                                          | 41 |
| <b>Figure S13k.</b> DEPT spectrum of AcDPiPn ( <b>13</b> ) in CD <sub>3</sub> OD. ....                                                             | 42 |
| <b>Figure S14a.</b> <sup>1</sup> H-NMR spectrum of AcDPMeOP ( <b>14</b> ) in CD <sub>3</sub> OD (400 MHz).....                                     | 42 |
| <b>Figure S14b.</b> <sup>13</sup> C-MNR spectrum of AcDPMeOP ( <b>14</b> ) in CD <sub>3</sub> OD (100 MHz). ....                                   | 43 |
| <b>Figure S14c.</b> COSY spectrum of AcDPMeOP ( <b>14</b> ) in CD <sub>3</sub> OD.. ....                                                           | 43 |
| <b>Figure S14d.</b> HSQC spectrum of AcDPMeOP ( <b>14</b> ) in CD <sub>3</sub> OD. ....                                                            | 44 |
| <b>Figure S14e.</b> Expansion ( $\delta_{\text{H}}$ 4.7-0.1, $\delta_{\text{C}}$ 77-2) of HSQC spectrum of <b>14</b> in CD <sub>3</sub> OD.....    | 44 |
| <b>Figure S14f.</b> Expansion ( $\delta_{\text{H}}$ 7.7-5.5, $\delta_{\text{C}}$ 165-110) of HSQC spectrum of <b>14</b> in CD <sub>3</sub> OD..... | 45 |
| <b>Figure S14g.</b> HMBC spectrum of AcDPMeOP ( <b>14</b> ) in CD <sub>3</sub> OD.. ....                                                           | 45 |
| <b>Figure S14h.</b> Expansion ( $\delta_{\text{H}}$ 7.7-0.5, $\delta_{\text{C}}$ 90-3) of HMBC spectrum of <b>14</b> in CD <sub>3</sub> OD.....    | 46 |
| <b>Figure S14i.</b> Expansion ( $\delta_{\text{H}}$ 8.0-0.5, $\delta_{\text{C}}$ 215-105) of HMBC spectrum of <b>14</b> in CD <sub>3</sub> OD..... | 46 |
| <b>Figure S15a.</b> <sup>1</sup> H-NMR spectrum of diDPB ( <b>15</b> ) in CD <sub>3</sub> OD (500 MHz).....                                        | 47 |
| <b>Figure S15b.</b> <sup>13</sup> C-NMR spectrum of diDPB ( <b>15</b> ) in CD <sub>3</sub> OD (125 MHz).....                                       | 47 |

## Supplementary Material

|                                                                                                                                                           |    |
|-----------------------------------------------------------------------------------------------------------------------------------------------------------|----|
| <b>Figure S15c.</b> COSY spectrum of diDPB ( <b>15</b> ) in CD <sub>3</sub> OD.....                                                                       | 48 |
| <b>Figure S15d.</b> HSQC spectrum of diDPB ( <b>15</b> ) in CD <sub>3</sub> OD. ....                                                                      | 48 |
| <b>Figure S15e.</b> Expansion ( $\delta_{\text{H}}$ 3.6-0.4, $\delta_{\text{C}}$ 65-5) of HSQC spectrum of diDPB ( <b>15</b> ) in CD <sub>3</sub> OD...49 |    |
| <b>Figure S15f.</b> HMBC spectrum of diDPB ( <b>15</b> ) in CD <sub>3</sub> OD. ....                                                                      | 49 |
| <b>Figure S15g.</b> Expansion ( $\delta_{\text{H}}$ 3.6-0.4, $\delta_{\text{C}}$ 65-5) of HMBC spectrum of <b>15</b> in CD <sub>3</sub> OD.....50         |    |
| <b>Figure S15h.</b> Expansion ( $\delta_{\text{H}}$ 8.0-0.3, $\delta_{\text{C}}$ 210-120) of HMBC spectrum of <b>15</b> in CD <sub>3</sub> OD.....50      |    |
| <b>Figure S15i.</b> NOESY2D spectrum of diDPB ( <b>15</b> ) in CD <sub>3</sub> OD.....                                                                    | 51 |
| <b>Figure S15j.</b> <sup>13</sup> C-DEPT spectrum of diDPB ( <b>15</b> ) in CD <sub>3</sub> OD. ....                                                      | 51 |
| <b>Figure S16a.</b> <sup>1</sup> H NMR spectrum of RTX ( <b>16</b> ) in CDCl <sub>3</sub> (400 MHz).....                                                  | 52 |
| <b>Figure S16b.</b> <sup>13</sup> C NMR spectrum of RTX ( <b>16</b> ) in CDCl <sub>3</sub> (100 MHz).....                                                 | 52 |
| <b>Figure S17a.</b> <sup>1</sup> H-NMR spectrum of EOF1 ( <b>17</b> ) in CD <sub>3</sub> OD (400 MHz).....                                                | 53 |
| <b>Figure S17b.</b> <sup>13</sup> C-NMR spectrum of EOF1 ( <b>17</b> ) in CD <sub>3</sub> OD. (100 MHz). ....                                             | 53 |
| <b>Figure S18a.</b> <sup>1</sup> H-NMR spectrum of EOF2 ( <b>18</b> ) in CD <sub>3</sub> OD (400 MHz).....                                                | 54 |
| <b>Figure S18b.</b> <sup>13</sup> C-NMR spectrum of EOF2 ( <b>18</b> ) in CD <sub>3</sub> OD (100 MHz).....                                               | 54 |

### 2- ECD spectra.

|                                                                                                                                                            |    |
|------------------------------------------------------------------------------------------------------------------------------------------------------------|----|
| <b>Figure S19.</b> Experimental ECD spectra of DPPI ( <b>1</b> ), DPPT ( <b>2</b> ), DPPBz ( <b>3</b> ), AcDPPT ( <b>5</b> ) and AcDPPBz ( <b>6</b> )..... | 55 |
|------------------------------------------------------------------------------------------------------------------------------------------------------------|----|

### 3- UHPLC-HRMS<sup>E</sup> data. Figures.

|                                                                                                                                                                                                                                                                                                                                                                                                                                                                                                                                                                                                                                                                                                                                                         |    |
|---------------------------------------------------------------------------------------------------------------------------------------------------------------------------------------------------------------------------------------------------------------------------------------------------------------------------------------------------------------------------------------------------------------------------------------------------------------------------------------------------------------------------------------------------------------------------------------------------------------------------------------------------------------------------------------------------------------------------------------------------------|----|
| <b>Figure S20.</b> Proposed fragmentation route for selected ions on HRMS <sup>E</sup> spectrum (Data Independent Acquisition (DIA)) [1], in ESI positive mode, for DPPI ( <b>1</b> ), DPPT ( <b>2</b> ), DPPBz ( <b>3</b> ) and DPPU <sub>1</sub> ( <b>19</b> ). In red, common daughter ions with group B compounds (see section 2.2 and Figure S22).....                                                                                                                                                                                                                                                                                                                                                                                             | 56 |
| <b>Figure S21.</b> Comparison of HRMS <sup>E</sup> spectra (DIA) [1] for (a) DPPT ( <b>2</b> ), (b) AcDPPI ( <b>4</b> ), (c) AcDPPT ( <b>5</b> ), (d) AcDPPBz ( <b>6</b> ), (e) AcDPPU <sub>2</sub> ( <b>20</b> ) and (f) AcDPPU <sub>3</sub> ( <b>21</b> ), m/z range 240-680 (data acquired in ESI positive mode with a ramp trap collision energy of the high-energy function set at 60-120 eV). ).....                                                                                                                                                                                                                                                                                                                                              | 57 |
| <b>Figure S22.</b> Proposed fragmentation route for selected ions on HRMS <sup>E</sup> spectrum (DIA) [1], in ESI positive mode, for AcDPPI ( <b>4</b> ), AcDPPT ( <b>5</b> ), AcDPPBz ( <b>6</b> ), AcDPPU <sub>2</sub> ( <b>20</b> ) and AcDPPU <sub>3</sub> ( <b>21</b> ). In red, common daughter ions with group A compounds (see section 2.2 and Figure S20).....                                                                                                                                                                                                                                                                                                                                                                                 | 58 |
| <b>Figure S23.</b> Comparison of HRMS <sup>E</sup> spectra (DIA) [1] for (a) DPB ( <b>7</b> ), (b) DPA ( <b>8</b> ) and (c) DPP ( <b>9</b> ), m/z range 240-540 (data acquired in ESI positive mode with a ramp trap collision energy of the high-energy function set at 10-40 eV).....                                                                                                                                                                                                                                                                                                                                                                                                                                                                 | 59 |
| <b>Figure S24.</b> Comparison of HRMS <sup>E</sup> spectra (DIA) [1] for: (a) DPB ( <b>7</b> ), (b) DPA ( <b>8</b> ) and, (c) DPP ( <b>9</b> ) X23; m/z range 240-365 (m/z range 240-540 in Figure S23) (data acquired in positive ionization with a ramp trap collision energy of the high-energy function set at 10-40 eV). Compounds <b>7</b> , <b>8</b> and <b>9</b> show daughter ions from their corresponding [M+Na] <sup>+</sup> molecular ions (see Figure S23) in their HRMS <sup>E</sup> spectra at m/z 313.1804, 295.1698, 277.1592, 267.1749 and 249.1643 (calculated) (in green in Scheme 3, Figures S24 and S25) which could be assigned to losses of water (1, 2 and 3 molecules), 2 molecules of water and CO and 3 molecules of water |    |

|                                                                                                                                                                                                                                                                                                                                                                                                                                                                                                                                                                                                                                                                                                                                                                                                                                                                                                                                                                                                                                                                                                                                                                                                                                                                                                                                                     |    |
|-----------------------------------------------------------------------------------------------------------------------------------------------------------------------------------------------------------------------------------------------------------------------------------------------------------------------------------------------------------------------------------------------------------------------------------------------------------------------------------------------------------------------------------------------------------------------------------------------------------------------------------------------------------------------------------------------------------------------------------------------------------------------------------------------------------------------------------------------------------------------------------------------------------------------------------------------------------------------------------------------------------------------------------------------------------------------------------------------------------------------------------------------------------------------------------------------------------------------------------------------------------------------------------------------------------------------------------------------------|----|
| and CO, respectively, from a precursor ion at $m/z$ 353.1729 (calculated) (in red in Scheme 3, Figures S24 and S25) (Table S2). Last mentioned ion, which is relatively abundant in HRMS <sup>E</sup> spectra of DPB (7) DPA (8) and DPP (9) (Table S2, Figures S23 and S23a) originates from a loss of an ester group at C-13 from parent molecular ions in each compound (Figure S23).....                                                                                                                                                                                                                                                                                                                                                                                                                                                                                                                                                                                                                                                                                                                                                                                                                                                                                                                                                        | 60 |
| <b>Figure S25.</b> Proposed fragmentation route for selected ions on HRMS <sup>E</sup> spectrum (DIA) [1], in ESI positive mode, for DPB (7), DPA (8) and DPP (9). In green, common daughter ions with group D compounds (see section 2.2 and Figure S29).....                                                                                                                                                                                                                                                                                                                                                                                                                                                                                                                                                                                                                                                                                                                                                                                                                                                                                                                                                                                                                                                                                      | 61 |
| <b>Figure S26.</b> Comparison of HRMS <sup>E</sup> spectra (DIA) [1], for (a) AcDPB (10), (b) AcDPA (11), (c) and AcDPP (12), $m/z$ range 240-560 (data acquired in ESI positive mode with a ramp trap collision energy of the high-energy function set at 10-40 eV). ....                                                                                                                                                                                                                                                                                                                                                                                                                                                                                                                                                                                                                                                                                                                                                                                                                                                                                                                                                                                                                                                                          | 62 |
| <b>Figure S27.</b> Comparison of HRMS <sup>E</sup> spectra (DIA) [1] for (a) AcDPB (10), (b) AcDPA (11), (c) and AcDPP (12), $m/z$ range 240-410 (data acquired in ESI positive mode with a ramp trap collision energy of the high-energy function set at 10-40 eV). ....                                                                                                                                                                                                                                                                                                                                                                                                                                                                                                                                                                                                                                                                                                                                                                                                                                                                                                                                                                                                                                                                           | 63 |
| <b>Figure S28.</b> Comparison of HRMS <sup>E</sup> spectra (DIA) [1] for (a) AcDPiPn (13) and (b) AcDPMeOP (14), $m/z$ range 240-600 ( $m/z$ range 240-410 in Figure 7) (data acquired in in ESI positive mode with a ramp trap collision energy of the high-energy function set at 10-40 eV). ....                                                                                                                                                                                                                                                                                                                                                                                                                                                                                                                                                                                                                                                                                                                                                                                                                                                                                                                                                                                                                                                 | 64 |
| <b>Figure S29.</b> Proposed fragmentation route for selected ions on HRMS <sup>E</sup> spectrum (DIA) [1], in ESI positive mode, for AcDPB (10), AcDPA (11), AcDPP (12), AcDPiPn (13) and AcDPMeOP (14). In green, common daughter ions with group C compounds (see section 2.2 and Figure S25).....                                                                                                                                                                                                                                                                                                                                                                                                                                                                                                                                                                                                                                                                                                                                                                                                                                                                                                                                                                                                                                                | 65 |
| <b>Figure S30.</b> Proposed fragmentation route for selected ions on HRMS <sup>E</sup> spectrum (DIA) [1], in ESI positive mode, for diDPB (15) and diDPU <sub>4</sub> (22).....                                                                                                                                                                                                                                                                                                                                                                                                                                                                                                                                                                                                                                                                                                                                                                                                                                                                                                                                                                                                                                                                                                                                                                    | 66 |
| <b>Figure S31.</b> Total Ion Current (TIC) and eXtracted Ion Chromatograms (XICs), at selected $m/z$ previously observed in high energy HRMS <sup>E</sup> of 12-deoxyphorbol 20-acetate-13-acyl derivatives, obtained from UHPLC-HRMS <sup>E</sup> experiments for chromatographic fraction F of <i>E. resinifera</i> (data acquired in ESI positive mode with a ramp trap collision energy of the high-energy function set at 10-40 eV; high-energy function (2: TOF MS ES <sup>+</sup> )). XICs for 12-deoxyphorbol 20-acetate-13-acyl derivatives [M+Na] <sup>+</sup> molecular ions: $m/z$ 483.2359 calculated mass for (a) C <sub>26</sub> H <sub>36</sub> O <sub>7</sub> Na (AcDPB (10)); (b) $m/z$ 495.2359 calculated mass for C <sub>27</sub> H <sub>36</sub> O <sub>7</sub> Na (AcDPA (11)); (c) $m/z$ 531.236, calculated mass for C <sub>30</sub> H <sub>36</sub> O <sub>7</sub> Na (AcDPP (12)) and (d) $m/z$ 497.2515, calculated mass for C <sub>27</sub> H <sub>38</sub> O <sub>7</sub> Na (AcDPiPn (13)). XICs for selected featured ions of 12-deoxyphorbol 20-acetate-13-acyl derivatives HRMS <sup>E</sup> spectra (see Scheme 4 and Figure S29) at: (e) $m/z$ 395.1834; (f) $m/z$ 335.1623; (g) $m/z$ 295.1698. (h) UHPLC-HRMS <sup>E</sup> chromatographic profile (TIC) of fraction F from <i>E. resinifera</i> extract..... | 67 |
| <b>Figure S32.</b> Total Ion Current (TIC) and eXtracted Ion Chromatograms (XICs), at selected $m/z$ previously observed in high energy HRMS <sup>E</sup> of 12-deoxy-16-hydroxyphorbol 20-acetate-13,16-diacyl derivatives, obtained from UHPLC-HRMS <sup>E</sup> experiments for chromatographic fraction G-6 of <i>E. resinifera</i> (data acquired in ESI positive mode with a ramp trap collision energy of the high-energy function set at 60-120 eV; high-energy function (2: TOF MS ES <sup>+</sup> )). XIC for 12-deoxy-16-hydroxyphorbol 20-acetate-16-benzoate-13-phenylacetate (AcDPPBz (6)) [M+Na] <sup>+</sup> molecular ion: (a) $m/z$ 651.2565, calculated mass for C <sub>37</sub> H <sub>40</sub> O <sub>9</sub> Na. XICs for selected characteristic ions of 16-hydroxy-12-deoxyphorbol 20-acetate-13,16-diacyl derivatives HRMS <sup>E</sup> spectra (see Scheme 2 and Figure S22) at (b) $m/z$ 529.2202, (c) $m/z$ 411.1784, (d) $m/z$ 393.1678, (e) $m/z$ 333.1467 and $m/z$ (f) 293.1542. (g) TIC of UHPLC-HRMS <sup>E</sup> chromatographic profile of fraction G-6 from <i>E. resinifera</i> extract.....                                                                                                                                                                                                                  | 68 |

**Figure S33.** Total Ion Current (TIC) and eXtracted Ion Chromatograms (XICs), at selected  $m/z$  previously observed in high energy HRMS<sup>E</sup> of 12-deoxyphorbol 20-acetate-13-acyl derivatives, obtained from UHPLC-HRMS<sup>E</sup> experiments for chromatographic fraction G-6 of *E. resinifera* (data acquired in ESI positive mode with a ramp trap collision energy of the high-energy function set at 10-40 eV; high-energy function (2: TOF MS ES<sup>+</sup>)). XIC for 12-deoxyphorbol 20-acetate-13-(*p*-methoxyphenyl)acetate (AcDPMeOP (**14**)) [M+Na]<sup>+</sup> molecular ion: (a)  $m/z$  561.2464 calculated mass for C<sub>31</sub>H<sub>38</sub>O<sub>8</sub>Na. XICs for selected featured ions of 12-deoxyphorbol 20-acetate-13-acyl derivatives HRMS<sup>E</sup> spectra (see Scheme 4 and Figure S29) at: (b)  $m/z$  395.1834; (c)  $m/z$  335.1623; (d)  $m/z$  295.1698. (e) UHPLC-HRMS<sup>E</sup> chromatographic profile (TIC) of fraction G-6 from *E. resinifera* extract..... 69

**Figure S34.** Total Ion Current (TIC) and eXtracted Ion Chromatograms (XICs), at selected  $m/z$  previously observed in high energy HRMS<sup>E</sup> of 12,20-dideoxyphorbol 13-acyl derivatives, obtained from UHPLC-HRMS<sup>E</sup> experiments for chromatographic fraction G-6 of *E. resinifera* (data acquired in ESI positive mode with a ramp trap collision energy of the high-energy function set at 10-40 eV; high-energy function (2: TOF MS ES<sup>+</sup>)). XIC for 12,20-dideoxyphorbol 13-isobutyrate (diDPB (**15**)) [M+Na]<sup>+</sup> molecular ion: (a)  $m/z$  425.2304 calculated mass for C<sub>24</sub>H<sub>34</sub>O<sub>5</sub>Na. XICs for selected featured ions of 12,20-dideoxyphorbol 13-acyl derivatives HRMS<sup>E</sup> spectra (see Scheme 5 and Figure S30) at: (b)  $m/z$  337.1780; (c)  $m/z$  297.1855; (d)  $m/z$  279.1749 and (e)  $m/z$  269.1905. (f) UHPLC-HRMS<sup>E</sup> chromatographic profile (TIC) of fraction G-6 from *E. resinifera* extract..... 70

**Figure S35.** Total Ion Current (TIC) and eXtracted Ion Chromatograms (XICs), at selected  $m/z$  previously observed in high energy HRMS<sup>E</sup> of 12-deoxy-16-hydroxyphorbol 20-acetate-13,16-diacyl derivatives, obtained from UHPLC-HRMS<sup>E</sup> experiments for chromatographic fraction G-7 of *E. resinifera* (data acquired in ESI positive mode with a ramp trap collision energy of the high-energy function set at 60-120 eV; high-energy function (2: TOF MS ES<sup>+</sup>)). XIC for 12-deoxy-16-hydroxyphorbol 20-acetate-13,16-diacyl derivatives [M+Na]<sup>+</sup> molecular ions: (a)  $m/z$  617.2727, calculated mass for C<sub>34</sub>H<sub>42</sub>O<sub>9</sub>Na (AcDPPI (**4**)); (b)  $m/z$  629.2727, calculated mass for C<sub>35</sub>H<sub>42</sub>O<sub>9</sub>Na (AcDPPT (**5**)); (c)  $m/z$  651.2565, calculated mass for C<sub>37</sub>H<sub>40</sub>O<sub>9</sub>Na (AcDPPBz (**6**)); (d)  $m/z$  603.2570, calculated mass for C<sub>33</sub>H<sub>40</sub>O<sub>9</sub>Na (AcDPPU<sub>2</sub> (**20**)). XICs for selected characteristic ions of 16-hydroxy-12-deoxyphorbol 20-acetate-13,16-diacyl derivatives HRMS<sup>E</sup> spectra (see Scheme 2 and Figure S22) at (e)  $m/z$  529.2202, (f)  $m/z$  411.1784, (g)  $m/z$  393.1678, (h)  $m/z$  333.1467 and (i)  $m/z$  293.1542. (j) TIC of UHPLC-HRMS<sup>E</sup> chromatographic profile of fraction G-7 from *E. resinifera* extract..... 71

**Figure S36.** Total Ion Current (TIC) and eXtracted Ion Chromatograms (XICs), at selected  $m/z$  previously observed in high energy HRMS<sup>E</sup> of 12-deoxyphorbol 20-acetate-13-acyl derivatives, obtained from UHPLC-HRMS<sup>E</sup> experiments for chromatographic fraction G-7 of *E. resinifera* (data acquired in ESI positive mode with a ramp trap collision energy of the high-energy function set at 10-40 eV; high-energy function (2: TOF MS ES<sup>+</sup>)). XICs for 12-deoxyphorbol 20-acetate-13-acyl derivatives [M+Na]<sup>+</sup> molecular ions: (a)  $m/z$  531.236, calculated mass for C<sub>30</sub>H<sub>36</sub>O<sub>7</sub>Na (AcDPP (**12**)); (b)  $m/z$  561.2464 calculated mass for C<sub>31</sub>H<sub>38</sub>O<sub>8</sub>Na (AcDPMeOP (**14**)). XICs for selected featured ions of 12-deoxyphorbol 20-acetate-13-acyl derivatives HRMS<sup>E</sup> spectra (see Scheme 4 and Figure S29) at: (c)  $m/z$  395.1834; (d)  $m/z$  335.1623; (e)  $m/z$  295.1698. (f) UHPLC-HRMS<sup>E</sup> chromatographic profile (TIC) of fraction G-7 from *E. resinifera* extract..... 72

## Supplementary Material

**Figure S37.** Total Ion Current (TIC) and eXtracted Ion Chromatograms (XICs), at selected  $m/z$  previously observed in high energy HRMS<sup>E</sup> of 12,20-dideoxyphorbol 13-acyl derivatives, obtained from UHPLC-HRMS<sup>E</sup> experiments for chromatographic fraction G-7 of *E. resinifera* (data acquired in ESI positive mode with a ramp trap collision energy of the high-energy function set at 10-40 eV; high-energy function (2: TOF MS ES<sup>+</sup>)). XIC for 12,20-dideoxyphorbol 13-acyl derivatives [M+Na]<sup>+</sup> molecular ion: (a)  $m/z$  437.2304 calculated mass for C<sub>25</sub>H<sub>34</sub>O<sub>5</sub>Na (diDPU<sub>4</sub> (22)). XICs for selected featured ions of 12,20-dideoxyphorbol 13-acyl derivatives HRMS<sup>E</sup> spectra (see Scheme 5 and Figure S30) at: (b)  $m/z$  337.1780; (c)  $m/z$  297.1855; (d)  $m/z$  279.1749 and (e)  $m/z$  269.1905. (f) UHPLC-HRMS<sup>E</sup> chromatographic profile (TIC) of fraction G-7 2019-Ac-FR11 from *E. resinifera* extract..... 73

**Figure S38.** Total Ion Current (TIC) and eXtracted Ion Chromatograms (XICs), at selected  $m/z$  previously observed in high energy HRMS<sup>E</sup> of 12-deoxy-16-hydroxyphorbol 20-acetate-13,16-diacyl derivatives, obtained from UHPLC-HRMS<sup>E</sup> experiments for chromatographic fraction G-8 of *E. resinifera* (data acquired in ESI positive mode with a ramp trap collision energy of the high-energy function set at 60-120 eV; high-energy function (2: TOF MS ES<sup>+</sup>)). XIC for 12-deoxy-16-hydroxyphorbol 20-acetate-13,16-diacyl derivatives [M+Na]<sup>+</sup> molecular ions: (a)  $m/z$  617.2727, calculated mass for C<sub>34</sub>H<sub>42</sub>O<sub>9</sub>Na (AcDPPI (4)); (b)  $m/z$  629.2727, calculated mass for C<sub>35</sub>H<sub>42</sub>O<sub>9</sub>Na (AcDPPT (5)); (c)  $m/z$  631.2883, calculated mass for C<sub>35</sub>H<sub>44</sub>O<sub>9</sub>Na (AcDPPU<sub>3</sub> (21)). XICs for selected characteristic ions of 16-hydroxy-12-deoxyphorbol 20-acetate-13,16-diacyl derivatives HRMS<sup>E</sup> spectra (see Scheme 2 and Figure S22) at (d)  $m/z$  529.2202, (e)  $m/z$  411.1784, (f)  $m/z$  393.1678, (g)  $m/z$  333.1467 and (h)  $m/z$  293.1542. (i) TIC of UHPLC-HRMS<sup>E</sup> chromatographic profile of fraction G-8 from *E. resinifera* extract..... 74

**Figure S39.** Total Ion Current (TIC) and eXtracted Ion Chromatograms (XICs), at selected  $m/z$  previously observed in high energy HRMS<sup>E</sup> of 12-deoxyphorbol 20-acetate-13-acyl derivatives, obtained from UHPLC-HRMS<sup>E</sup> experiments for chromatographic fraction G-8 of *E. resinifera* (data acquired in ESI positive mode with a ramp trap collision energy of the high-energy function set at 10-40 eV; high-energy function (2: TOF MS ES<sup>+</sup>)). XIC for 12-deoxyphorbol 20-acetate-13-phenylacetate (AcDPP (12)) [M+Na]<sup>+</sup> molecular ion: (a)  $m/z$  531.2359 calculated mass for C<sub>30</sub>H<sub>36</sub>O<sub>7</sub>Na. XICs for selected featured ions of 12-deoxyphorbol 20-acetate-13-acyl derivatives HRMS<sup>E</sup> spectra (see Scheme 4 and Figure S29) at: (b)  $m/z$  395.1834; (c)  $m/z$  335.1623; (d)  $m/z$  295.1698. (e) UHPLC-HRMS<sup>E</sup> chromatographic profile (TIC) of fraction G-8 from *E. resinifera* extract..... 75

**Figure S40.** Total Ion Current (TIC) and eXtracted Ion Chromatograms (XICs), at selected  $m/z$  previously observed in high energy HRMS<sup>E</sup> of 12-deoxy-16-hydroxyphorbol 13,16-diacyl derivatives, obtained from UHPLC-HRMS<sup>E</sup> experiments for chromatographic fraction G-9 of *E. resinifera* (data acquired in ESI positive mode with a ramp trap collision energy of the high-energy function set at 60-120 eV; high-energy function (2: TOF MS ES<sup>+</sup>)). XIC for 12-deoxy-16-hydroxyphorbol 13,16-diacyl derivatives [M+Na]<sup>+</sup> molecular ions: (a)  $m/z$  575.2621, calculated mass for C<sub>32</sub>H<sub>40</sub>O<sub>8</sub>Na (DPPI (1)); (b)  $m/z$  587.2621, calculated mass for C<sub>33</sub>H<sub>40</sub>O<sub>8</sub>Na (DPPT (2)); (c)  $m/z$  609.2464, calculated mass for C<sub>35</sub>H<sub>38</sub>O<sub>8</sub>Na (DPPBz (3)); (d)  $m/z$  589.2777, calculated mass for C<sub>33</sub>H<sub>42</sub>O<sub>8</sub>Na (DPPU<sub>1</sub> (19)). XICs for selected characteristic ions of 12-deoxy-16-hydroxyphorbol 13,16-diacyl derivatives HRMS<sup>E</sup> spectra (see Scheme 1 and Figure S20) at (e)  $m/z$  487.2097, (f)  $m/z$  369.1678, (g)  $m/z$  351.1572, (h)  $m/z$  323.1623 and (i)  $m/z$  293.1542. (j) TIC of UHPLC-HRMS<sup>E</sup> chromatographic profile of fraction G-9 from *E. resinifera* extract..... 76

## Supplementary Material

**Figure S41.** Total Ion Current (TIC) and eXtracted Ion Chromatograms (XICs), at selected  $m/z$  previously observed in high energy HRMS<sup>E</sup> of 12-deoxyphorbol 13-acyl derivatives, obtained from UHPLC-HRMS<sup>E</sup> experiments for chromatographic fraction G-9 of *E. resinifera* (data acquired in ESI positive mode with a ramp trap collision energy of the high-energy function set at 10-40 eV; high-energy function (2: TOF MS ES+)). XICs for 12-deoxyphorbol 13-acyl derivatives [M+Na]<sup>+</sup> molecular ions: (a)  $m/z$  441.2253 calculated mass for C<sub>24</sub>H<sub>34</sub>O<sub>6</sub>Na (DPB (7)); (b)  $m/z$  453.2253 calculated mass for C<sub>25</sub>H<sub>34</sub>O<sub>6</sub>Na (DPA (8)) and (c)  $m/z$  489.2253, calculated mass for C<sub>28</sub>H<sub>34</sub>O<sub>6</sub>Na (DPP (9)). XICs for selected featured ions of 12-deoxyphorbol 13-acyl derivatives HRMS<sup>E</sup> spectra (see Scheme 3 and Figure S25) at: (d)  $m/z$  395.1834; (e)  $m/z$  335.1623; (f)  $m/z$  295.1698. (g) UHPLC-HRMS<sup>E</sup> chromatographic profile (TIC) of fraction from *E. resinifera* extract..... 77

### 4- UHPLC-HRMS<sup>E</sup> data. Tables.

**Table S1.** Selected ions of high energy HRMS<sup>E</sup> experiment (DIA) [1] of DPPI (1) and DPPT (2) (data acquired in ESI positive ionization with a ramp trap collision energy of the high-energy function set at 60-120 eV). ..... 78

**Table S2.** Selected ions of high energy HRMS<sup>E</sup> experiment (DIA) [1] of DPA (8) and DPP (9) (data acquired in ESI positive ionization with a ramp trap collision energy of the high-energy function set at 10-40 eV). ..... 79

**Table S3.** Selected ions of high energy HRMS<sup>E</sup> experiment (DIA) [1] of AcDPB (10), AcDPA (11) and AcDPP (12) (data acquired in ESI positive ionization with a ramp trap collision energy of the high-energy function set at 10-40 eV). ..... 80

**References.** ..... 81



# Supplementary Material

## 1- NMR Spectra

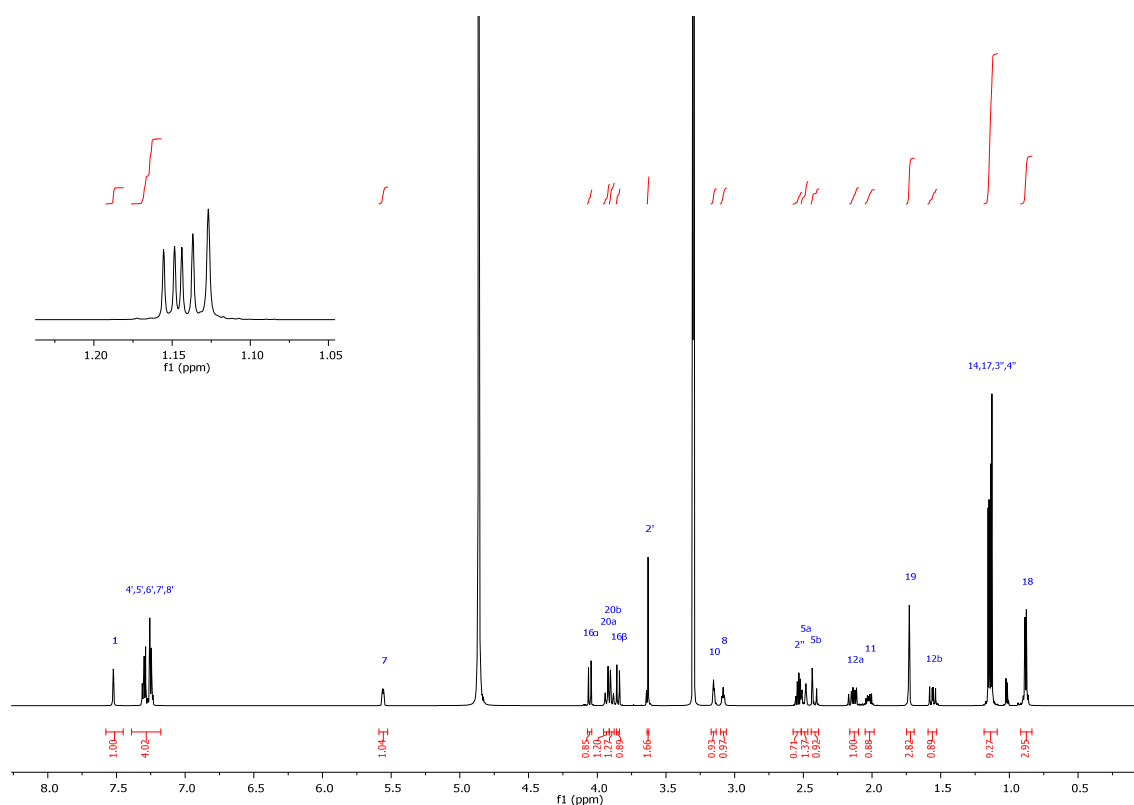

**Figure S1a.  $^1\text{H}$  NMR spectrum of DPPI (1) in  $\text{CD}_3\text{OD}$  (600 MHz).**

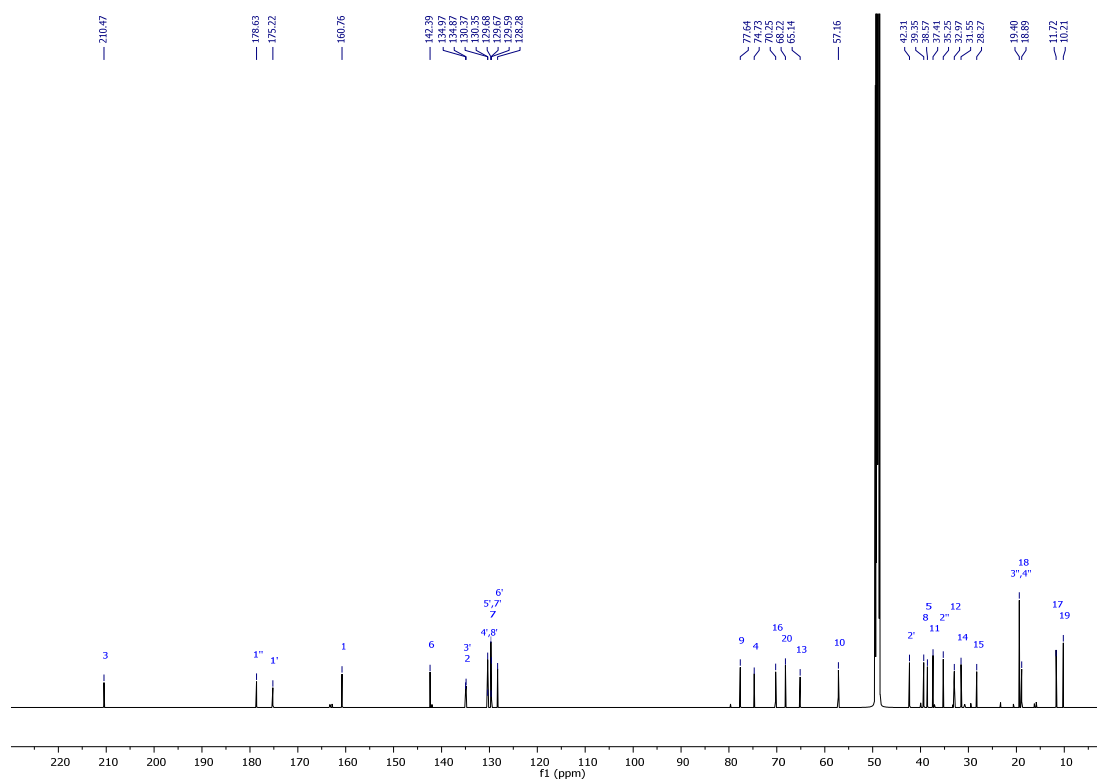

**Figure S1b.  $^{13}\text{C}$  NMR spectrum of DPPI (1) in  $\text{MeOD}$  (150 MHz).**

Supplementary Material

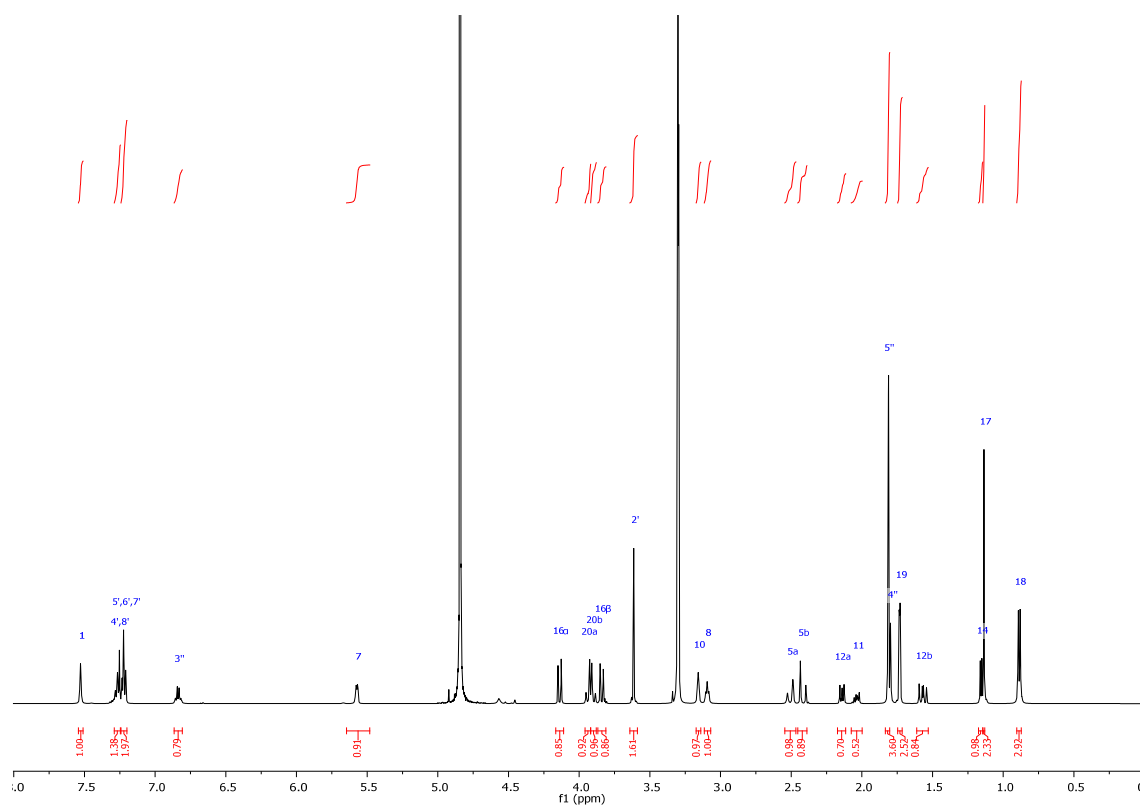

Figure S2a. <sup>1</sup>H-NMR spectrum DPPT (2) in CD<sub>3</sub>OD (500 MHz).

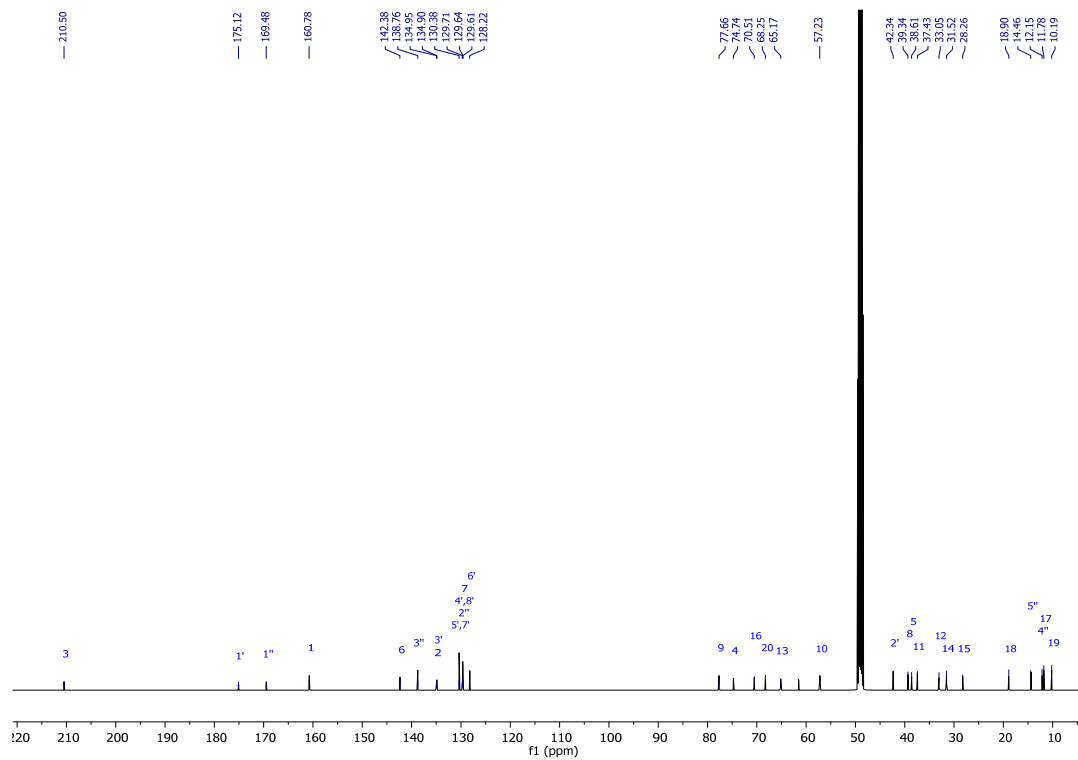

Figure S2b. <sup>13</sup>C-NMR spectrum of DPPT (2) in CD<sub>3</sub>OD (150 MHz).

## Supplementary Material

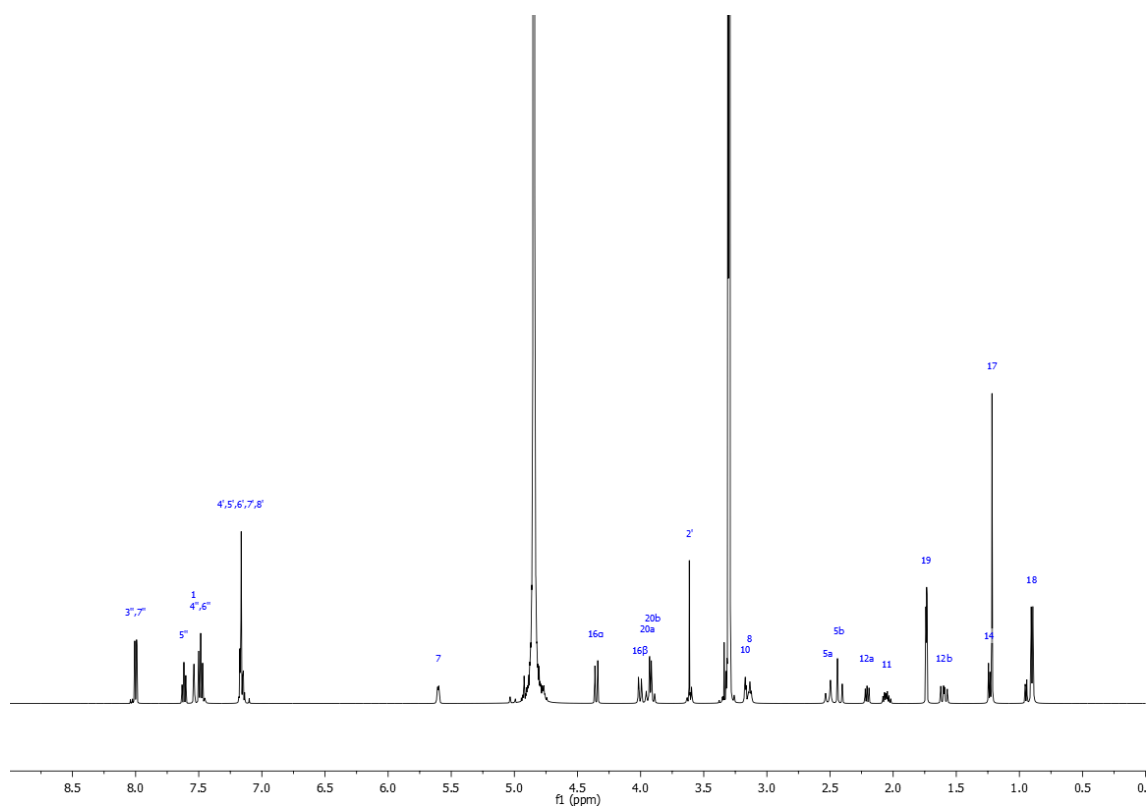

**Figure S3a.**  $^1\text{H}$ -NMR spectrum of DPPBz (**3**) in  $\text{CD}_3\text{OD}$  (400 MHz).

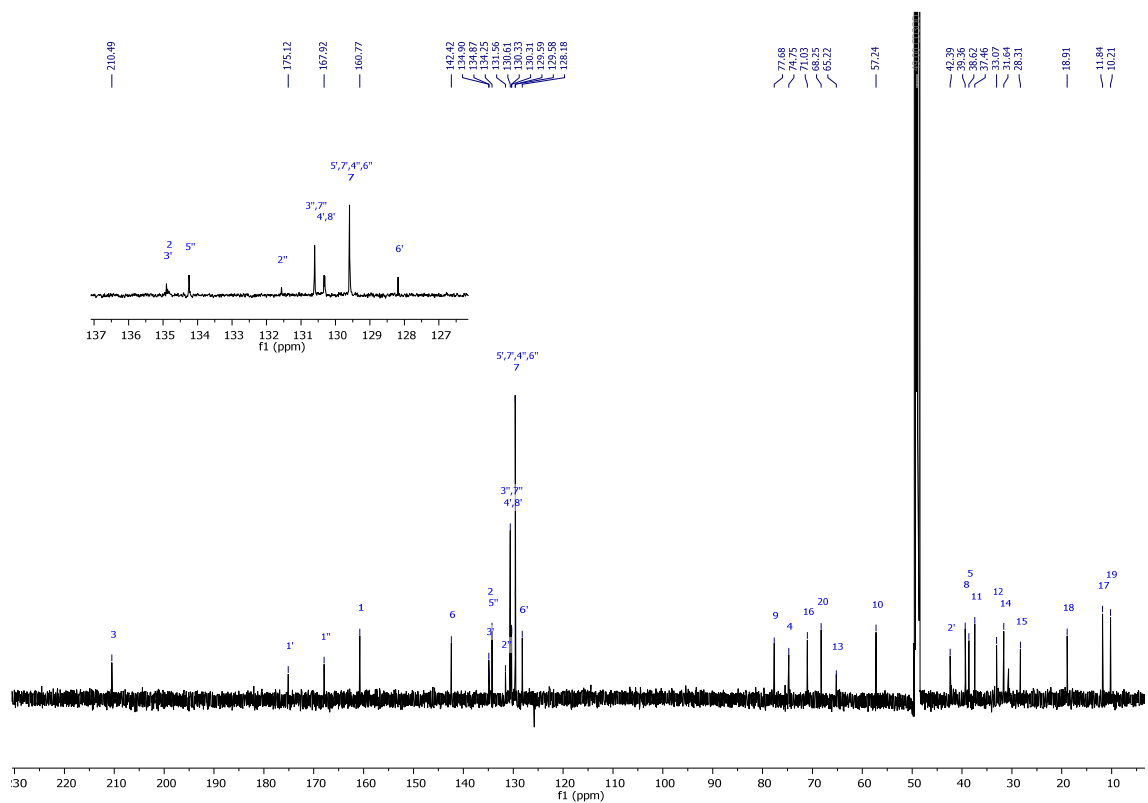

**Figure S3b.**  $^{13}\text{C}$ -NMR spectrum of DPPBz (**3**) in  $\text{CD}_3\text{OD}$  (100 MHz).

## Supplementary Material

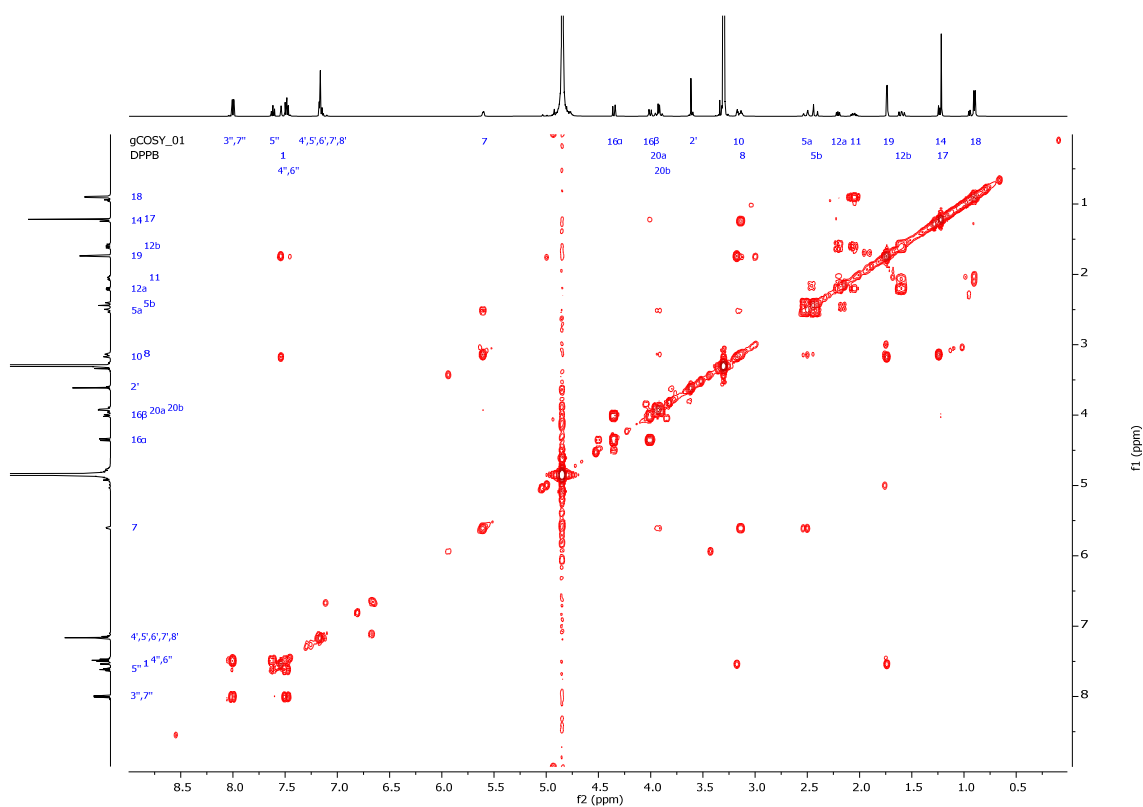

**Figure S3c.** COSY spectrum of DPPBz (**3**) in CD<sub>3</sub>OD.

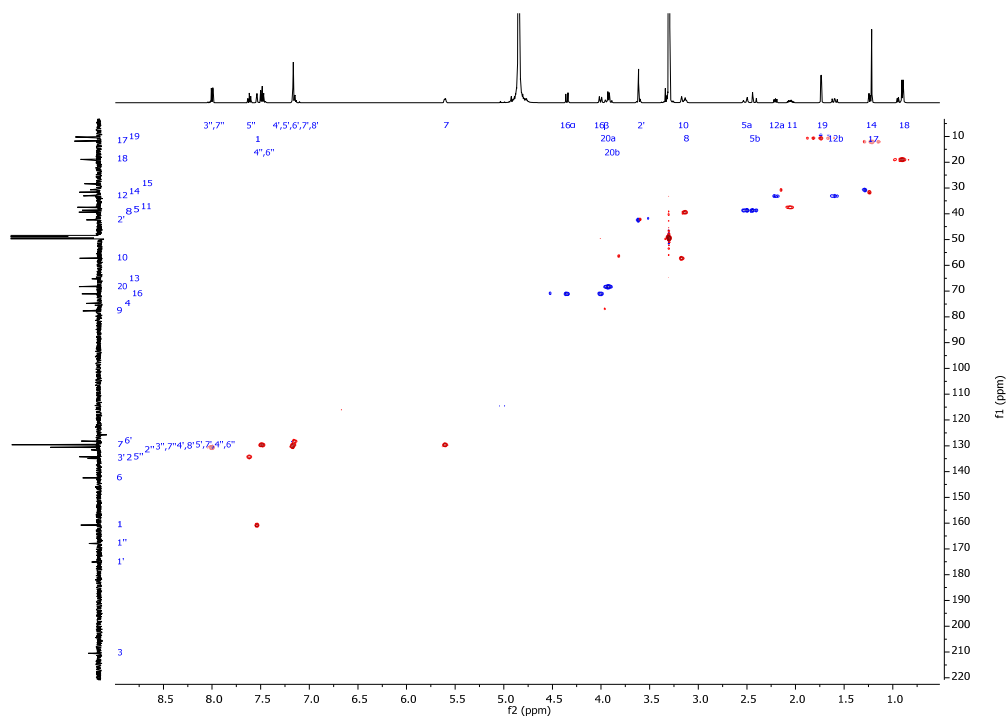

**Figure S3d.** HSQC spectrum of DPPBz (**3**) in CD<sub>3</sub>OD.

## Supplementary Material

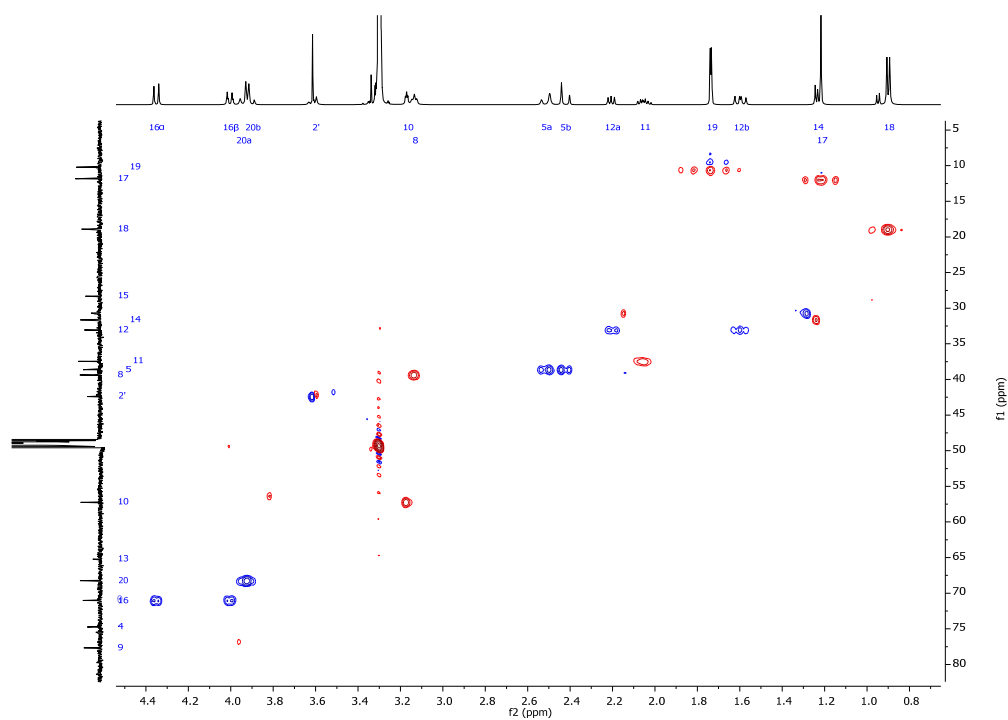

**Figure S3e.** Expansion ( $\delta_{\text{H}}$  4.7-0.6,  $\delta_{\text{C}}$  80-2) of HSQC spectrum of DPPBz (**3**) in  $\text{CD}_3\text{OD}$ .

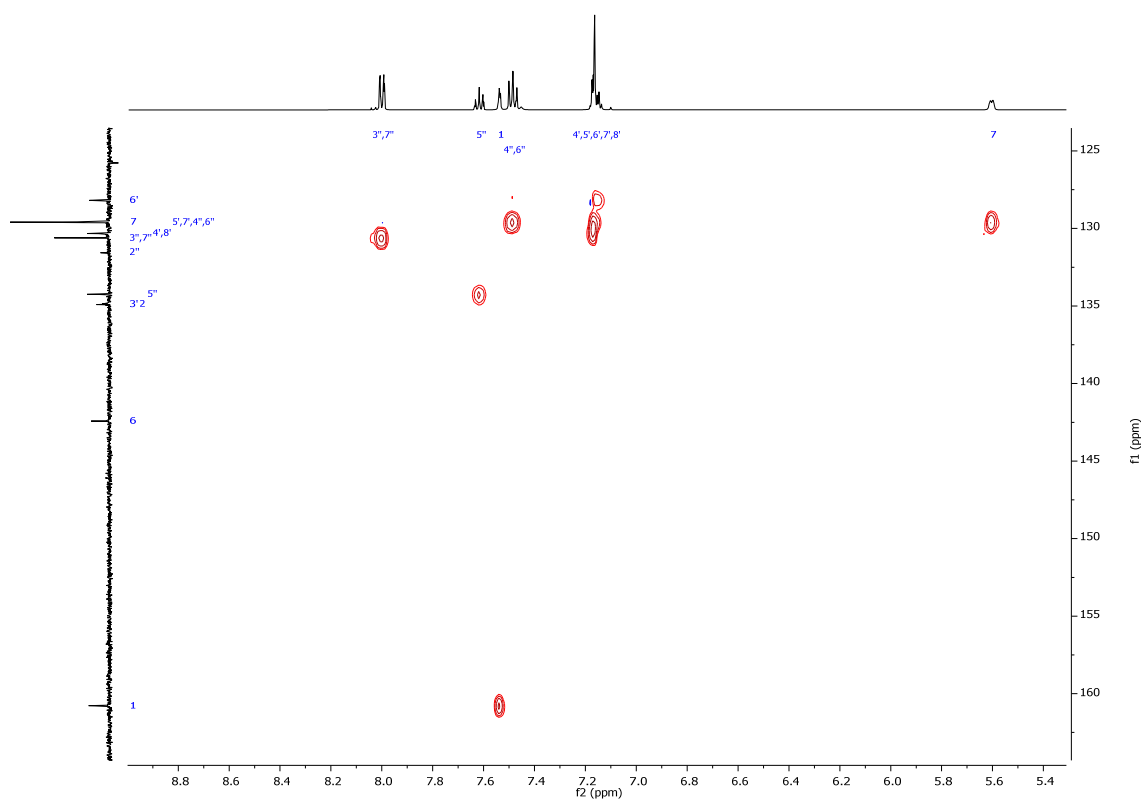

**Figure S3f.** Expansion ( $\delta_{\text{H}}$  8.3-5.4,  $\delta_{\text{C}}$  162-120) of HSQC spectrum of DPPBz (**3**) in  $\text{CD}_3\text{OD}$ .

# Supplementary Material

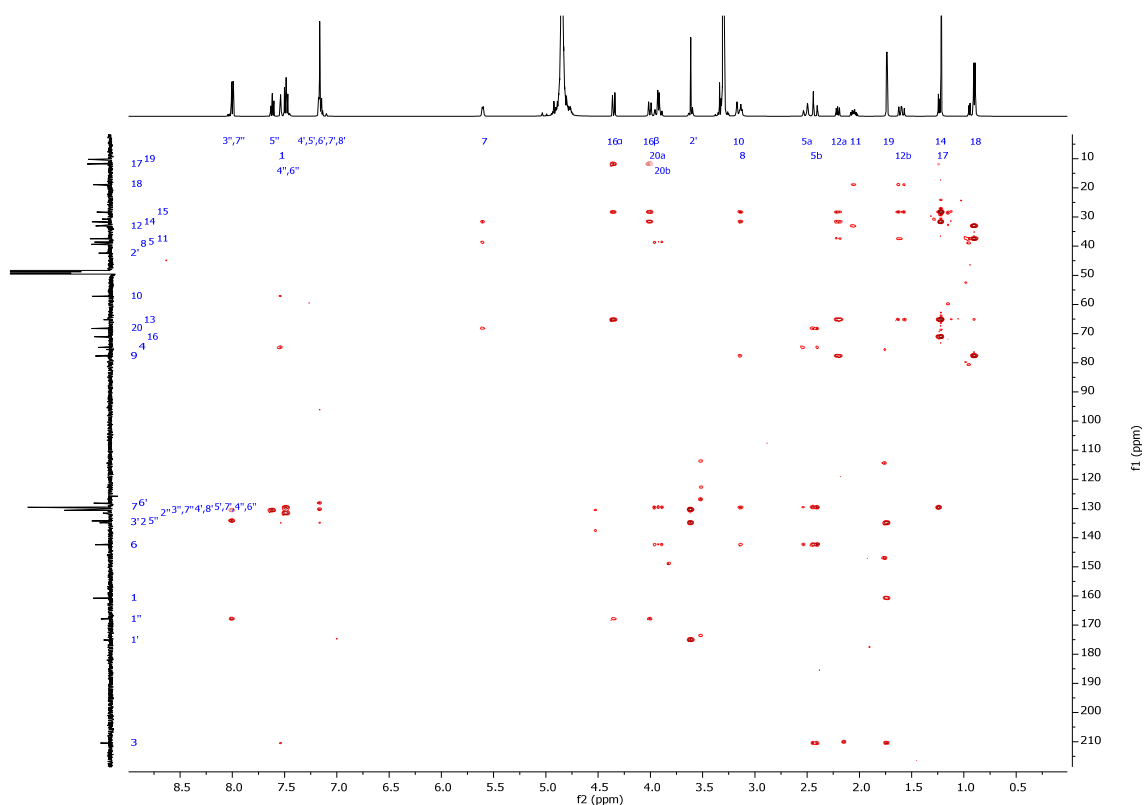

**Figure S3g.** HMBC spectrum of DPPBz (**3**) in CD<sub>3</sub>OD.

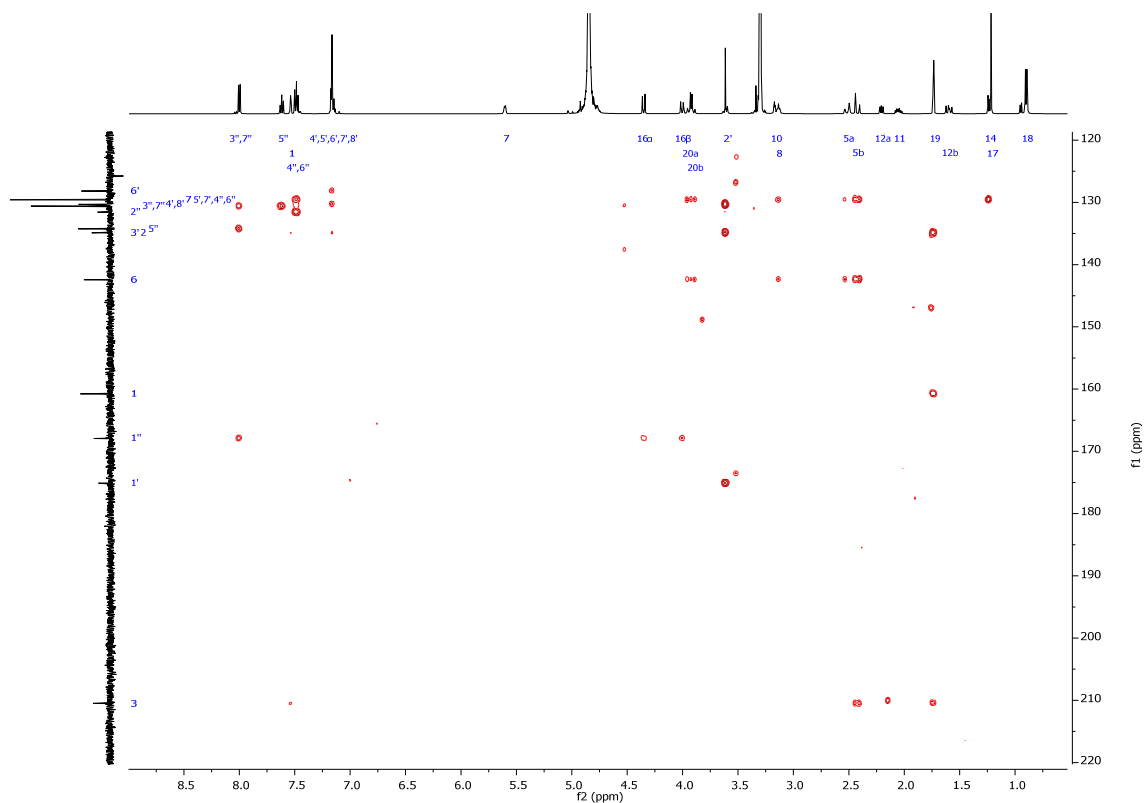

**Figure S3h.** Expansion ( $\delta_H$  8.9-0.2,  $\delta_C$  218-119) of HMBC spectrum of DPPBz (**3**) in CD<sub>3</sub>OD.

## Supplementary Material

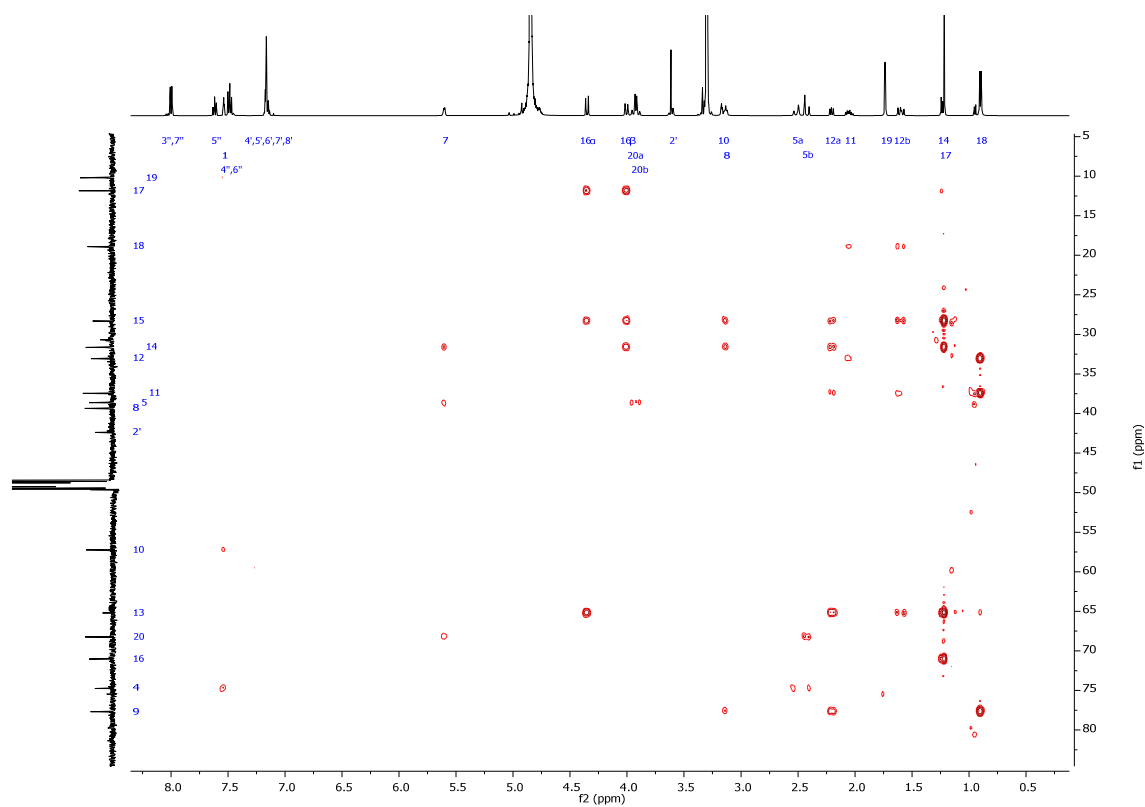

**Figure S3i.** Expansion ( $\delta_{\text{H}}$  8.4-0.4,  $\delta_{\text{C}}$  82-5) of HMBC spectrum of DPPBz (**3**) in  $\text{CD}_3\text{OD}$ .

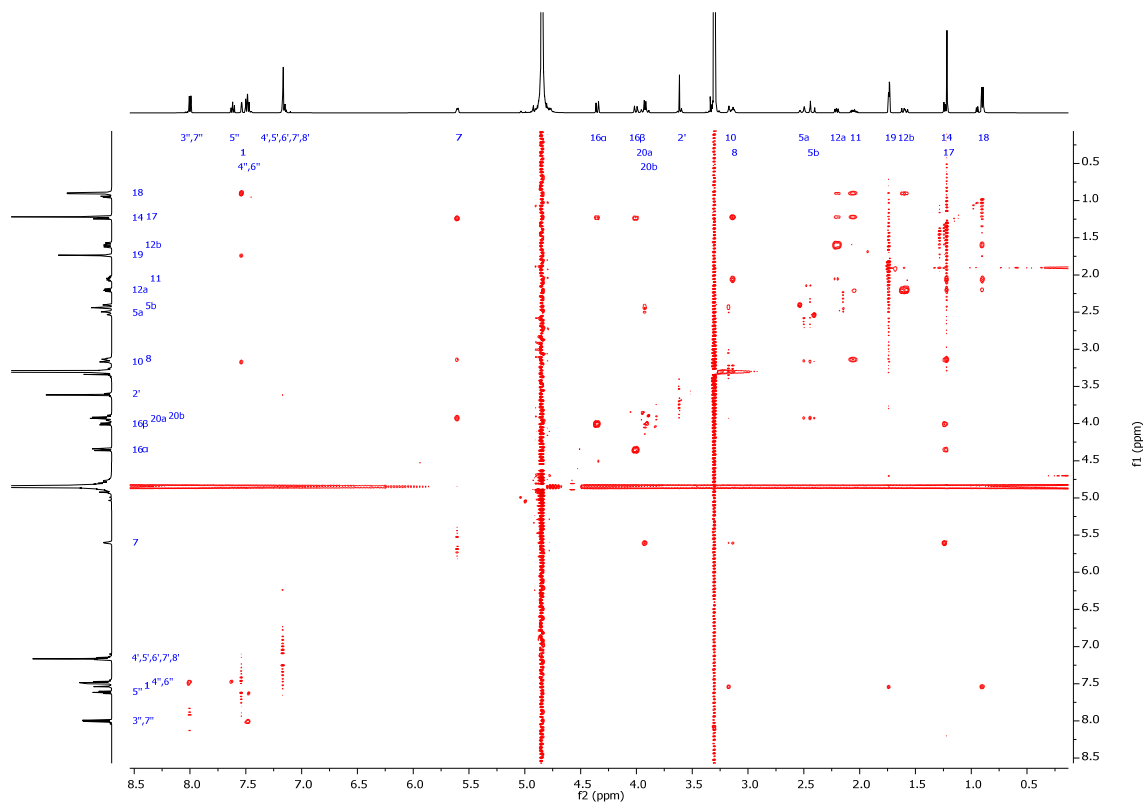

**Figure S3j.** NOESY2D spectrum of DPPBz (**3**) in  $\text{CD}_3\text{OD}$

# Supplementary Material

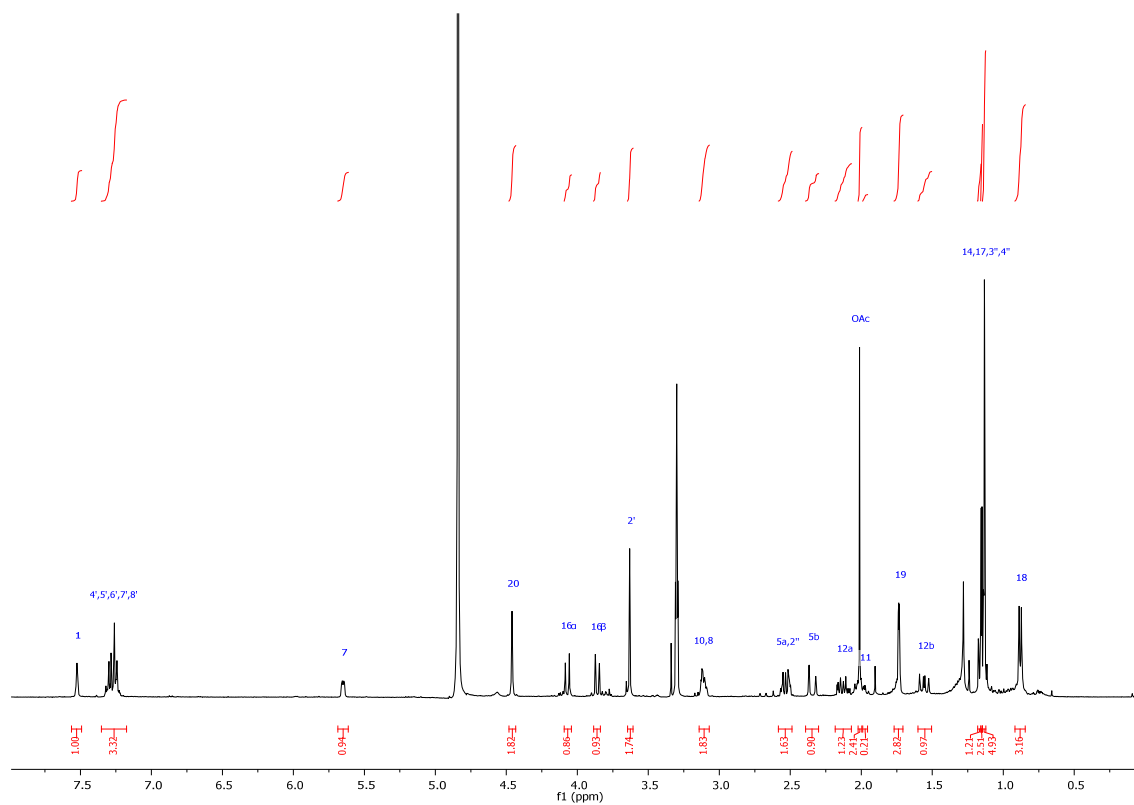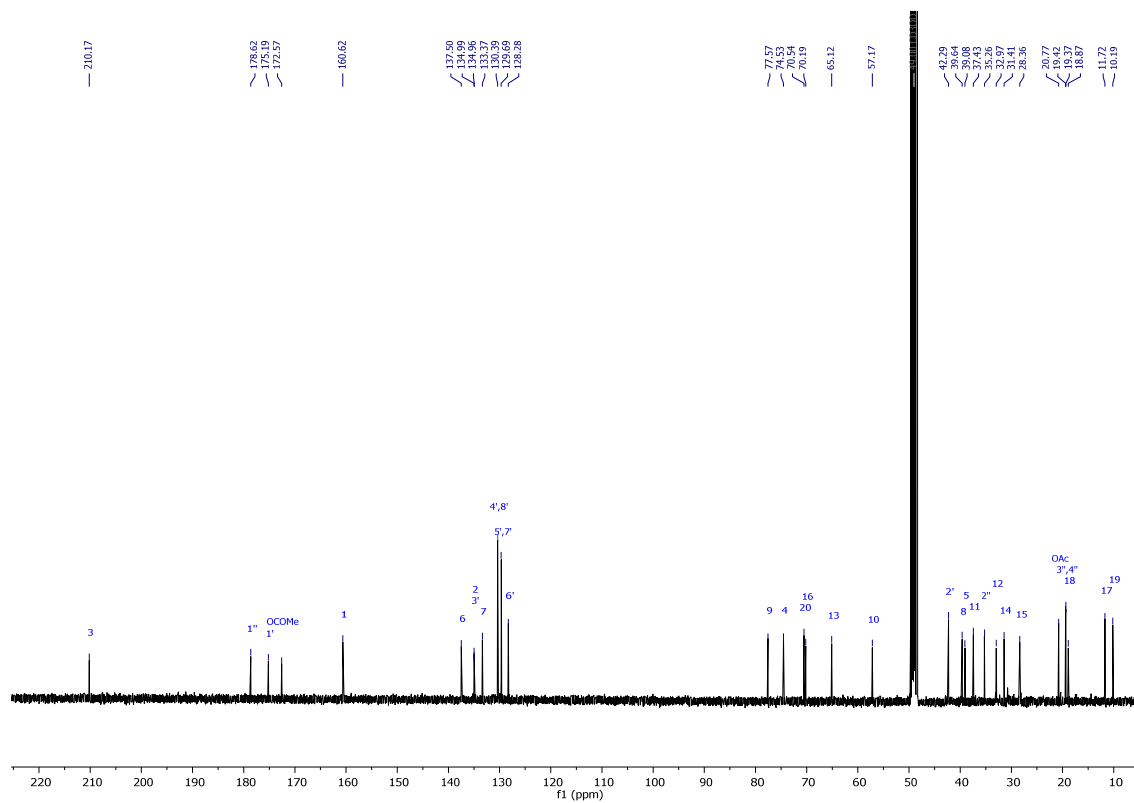



# Supplementary Material

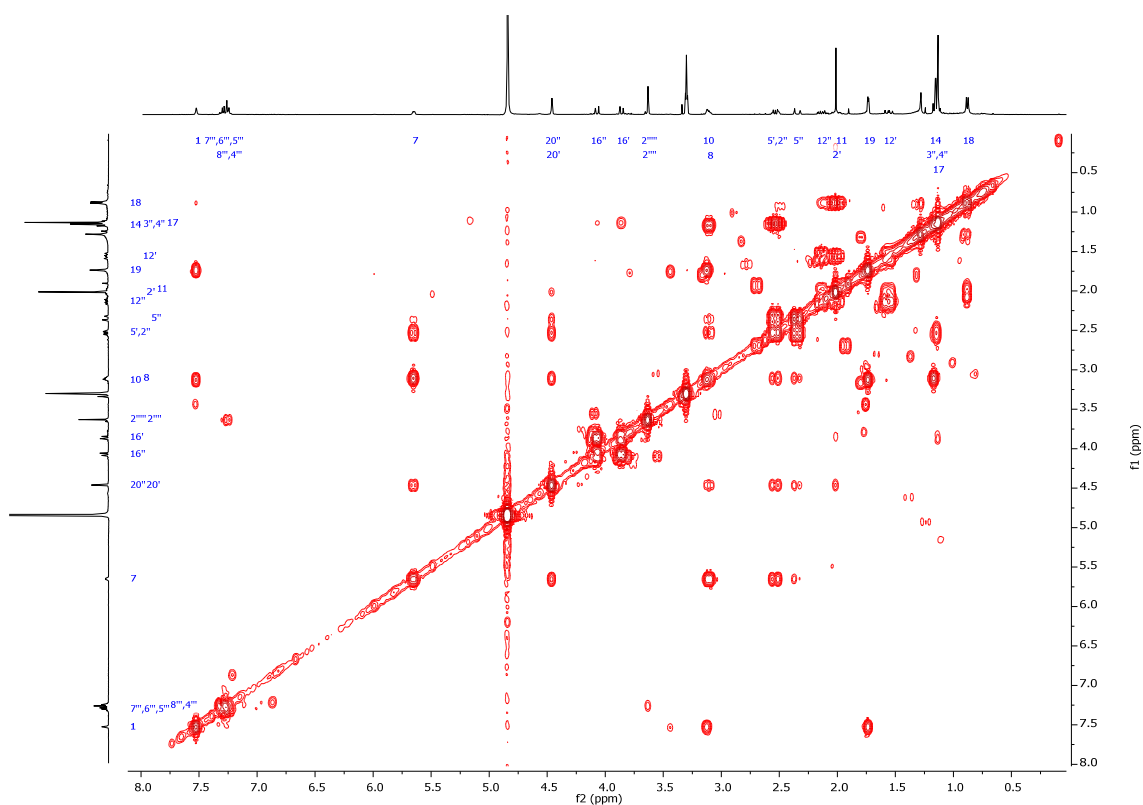

Figure S4c. COSY spectrum of AcDPPI (4) in CD<sub>3</sub>OD.

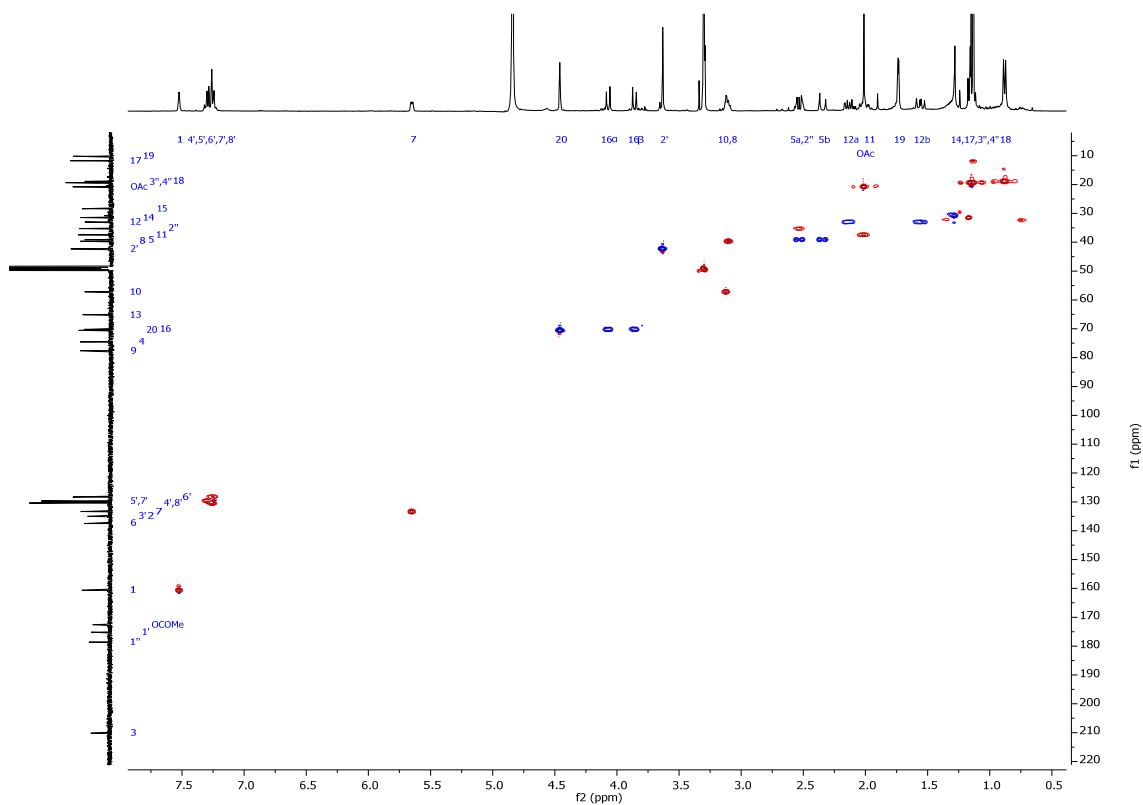

Figure S4d. HSQC spectrum of AcDPPI (4) in CD<sub>3</sub>OD.

# Supplementary Material

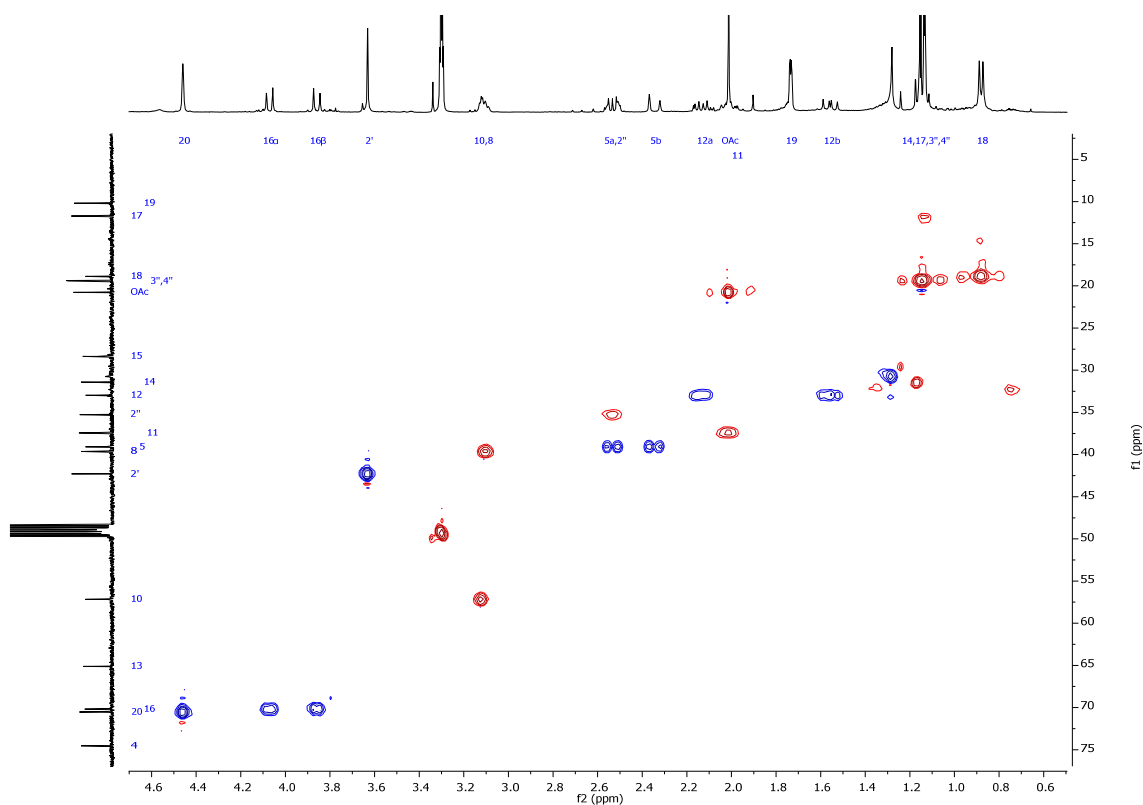

**Figure S4e.** Expansion ( $\delta_{\text{H}}$  4.7-0.5,  $\delta_{\text{C}}$  77-2) of HSQC spectrum of AcDPPI (**4**) in  $\text{CD}_3\text{OD}$ .

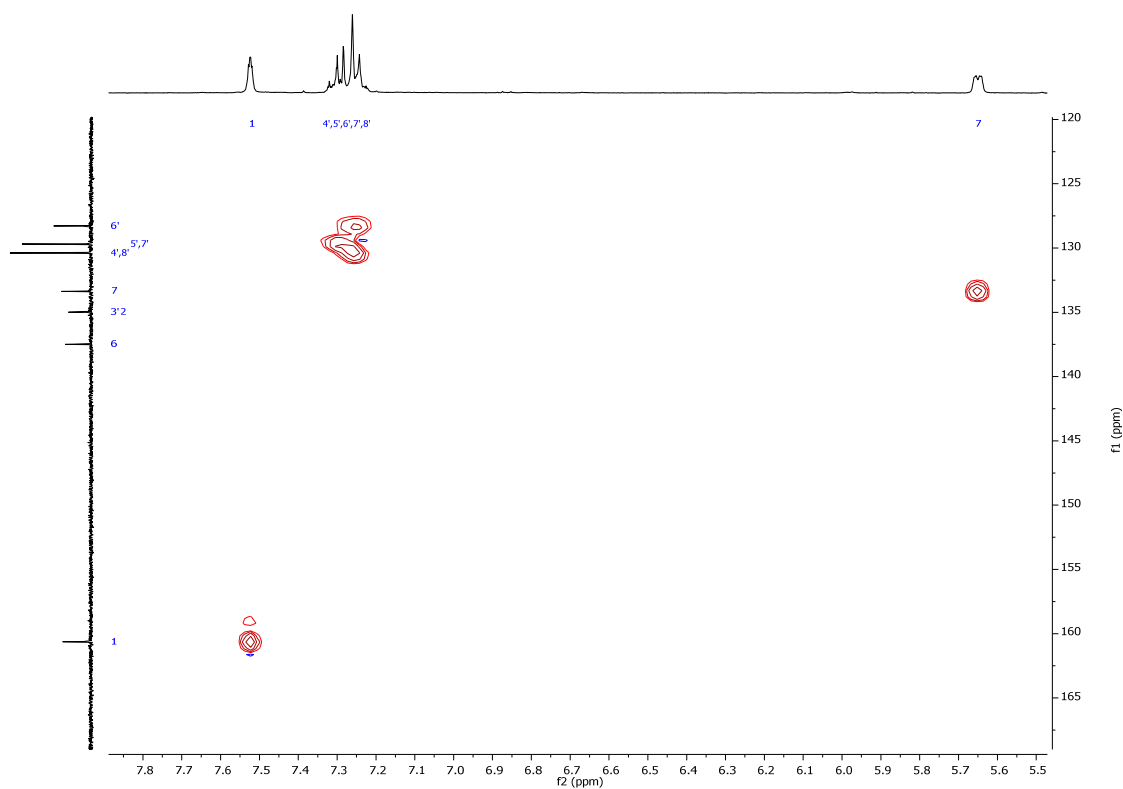

**Figure S4f.** Expansion ( $\delta_{\text{H}}$  7.8-5.5,  $\delta_{\text{C}}$  165-120) of HSQC spectrum of AcDPPI (**4**) in  $\text{CD}_3\text{OD}$ .

# Supplementary Material

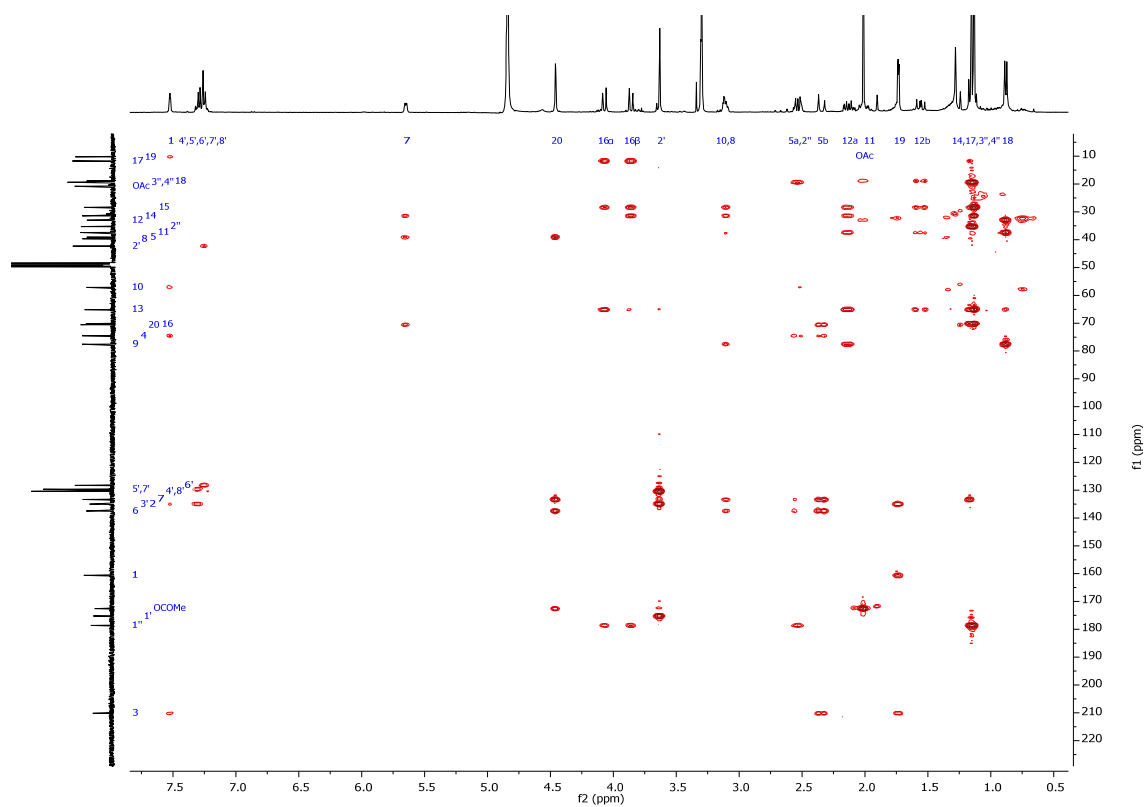

**Figure S4g.** HMBC spectrum of AcDPPI (4) in CD<sub>3</sub>OD.

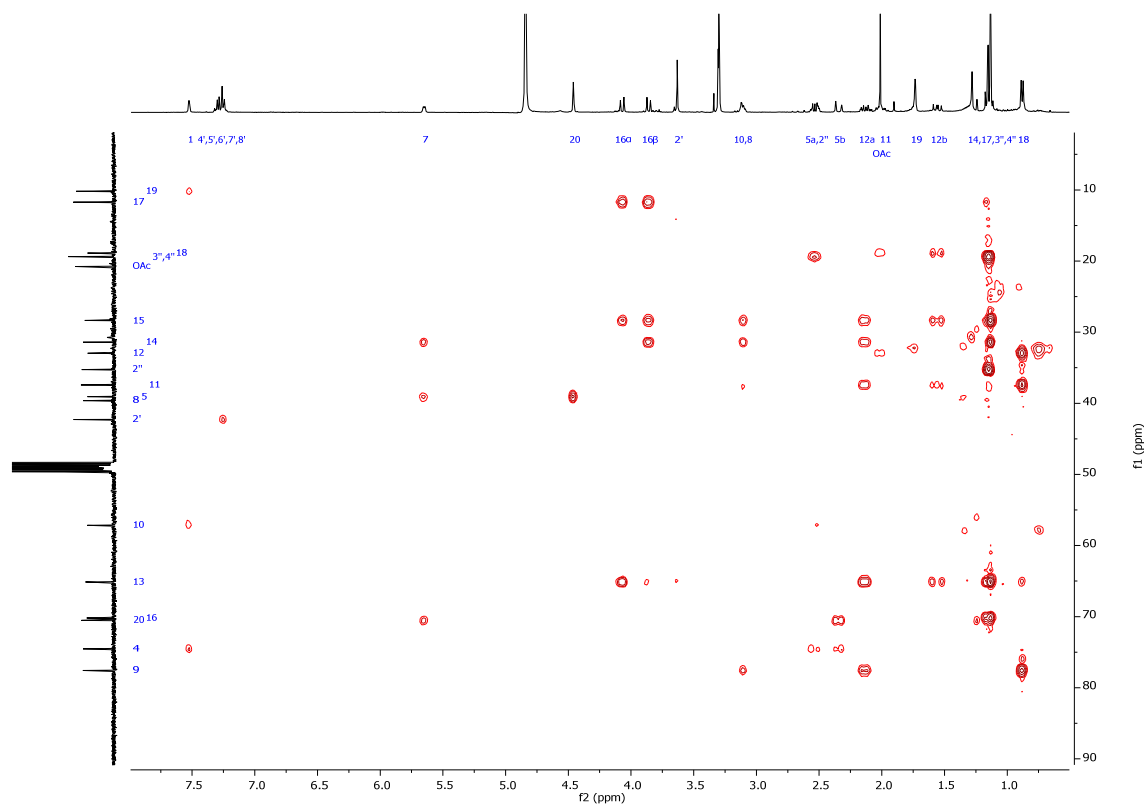

**Figure S4h.** Expansion ( $\delta_H$  8.0-0.4,  $\delta_C$  91-5) of HMBC spectrum of AcDPPI (4) in CD<sub>3</sub>OD

## Supplementary Material

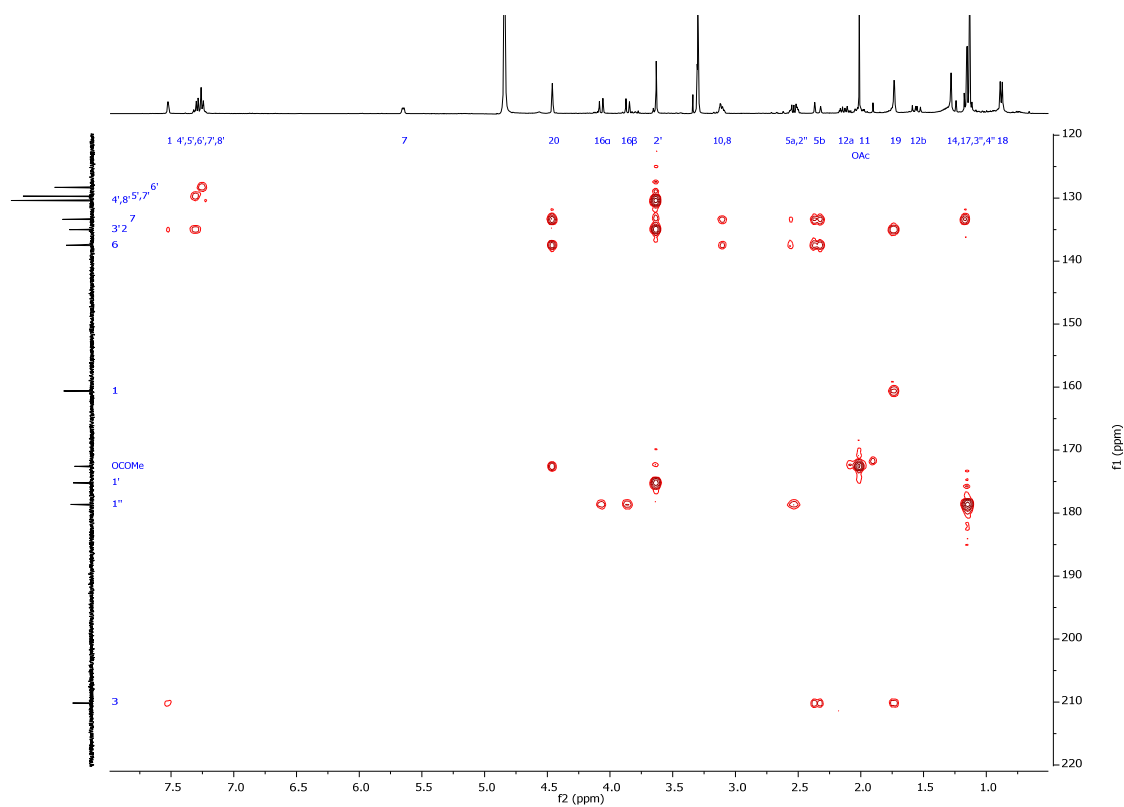

**Figure S4i.** Expansion ( $\delta_{\text{H}}$  8.0-0.4,  $\delta_{\text{C}}$  220-120) of HMBC spectrum of AcDPPI (4) in CD<sub>3</sub>OD

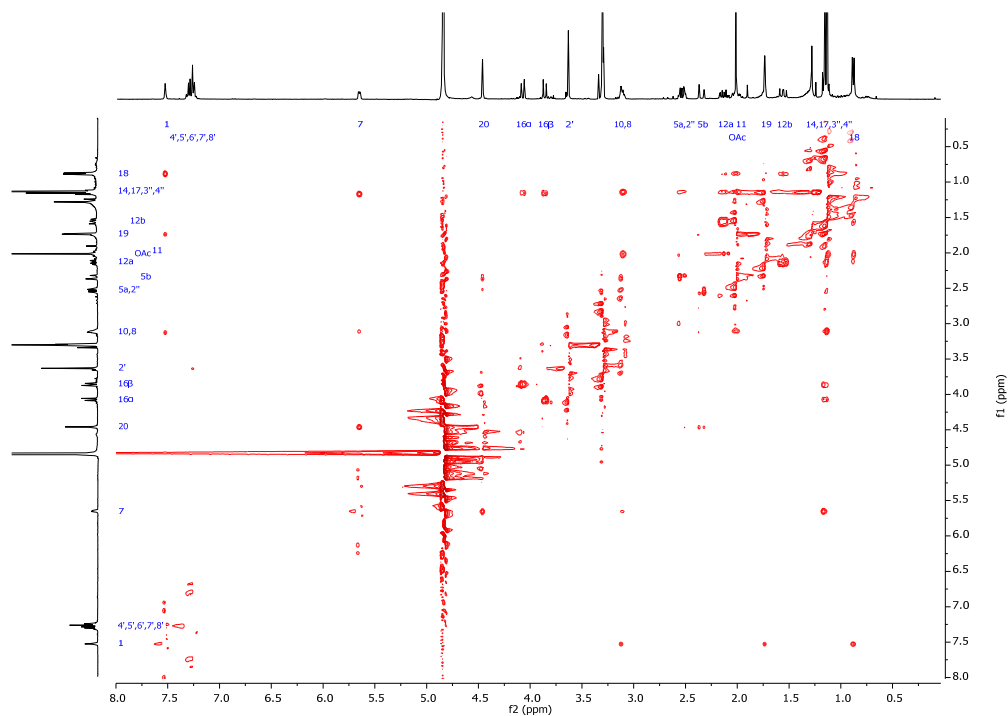

**Figure S4j.** NOESY2D spectrum of AcDPPI (4) in CD<sub>3</sub>OD.

# Supplementary Material

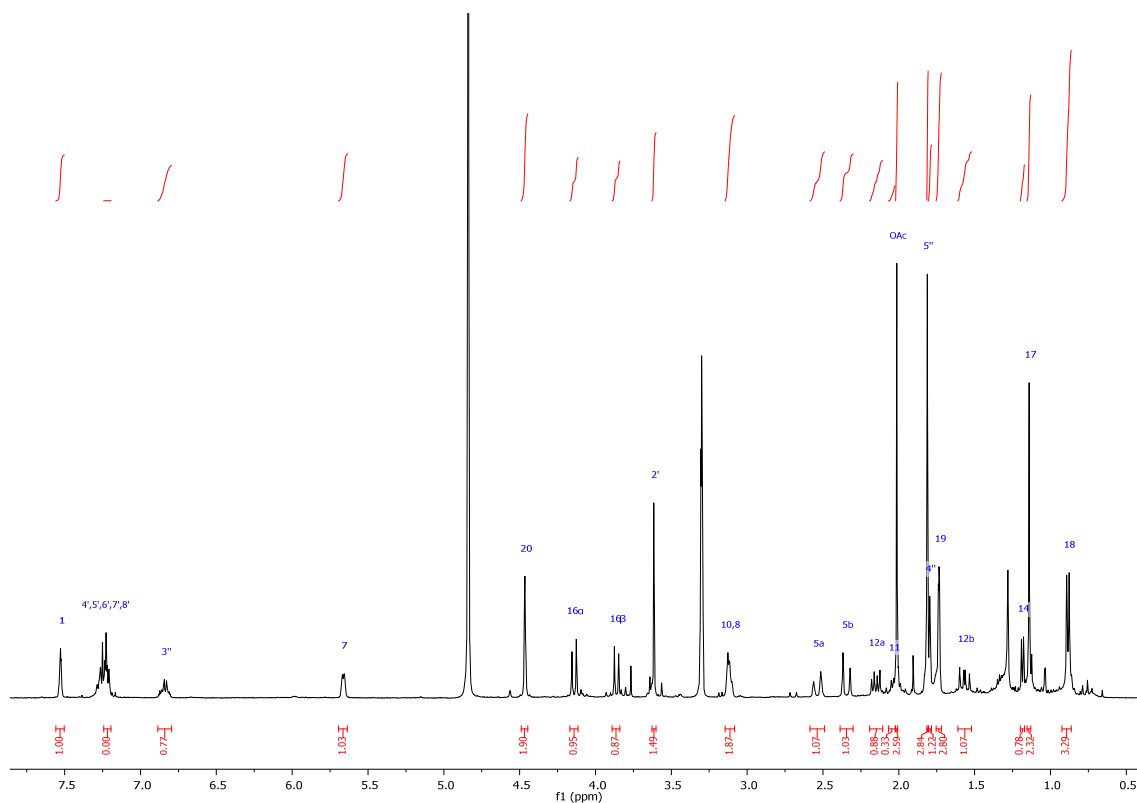

**Figure S5a.**  $^1\text{H}$  NMR spectrum of AcDPPT (**5**) in  $\text{CD}_3\text{OD}$  (400 MHz).

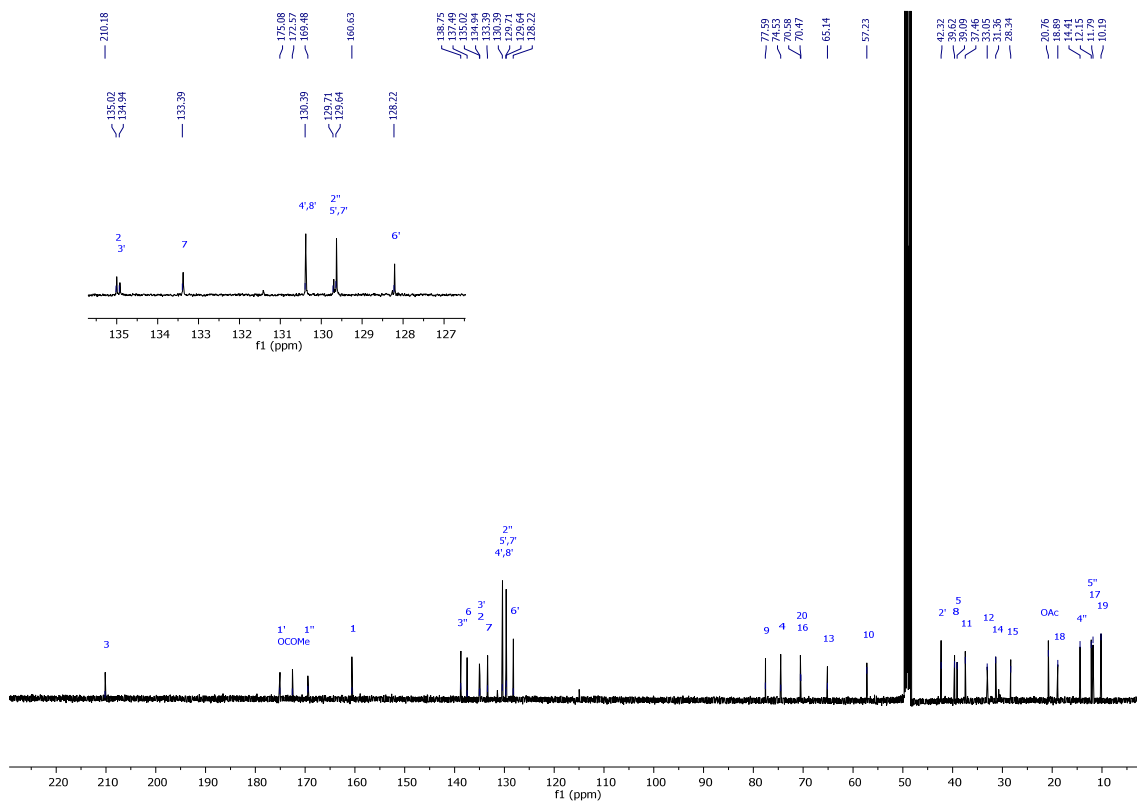

**Figure S5b.**  $^{13}\text{C}$  NMR spectrum of AcDPPT (**5**) in  $\text{CD}_3\text{OD}$  (100 MHz).

## Supplementary Material

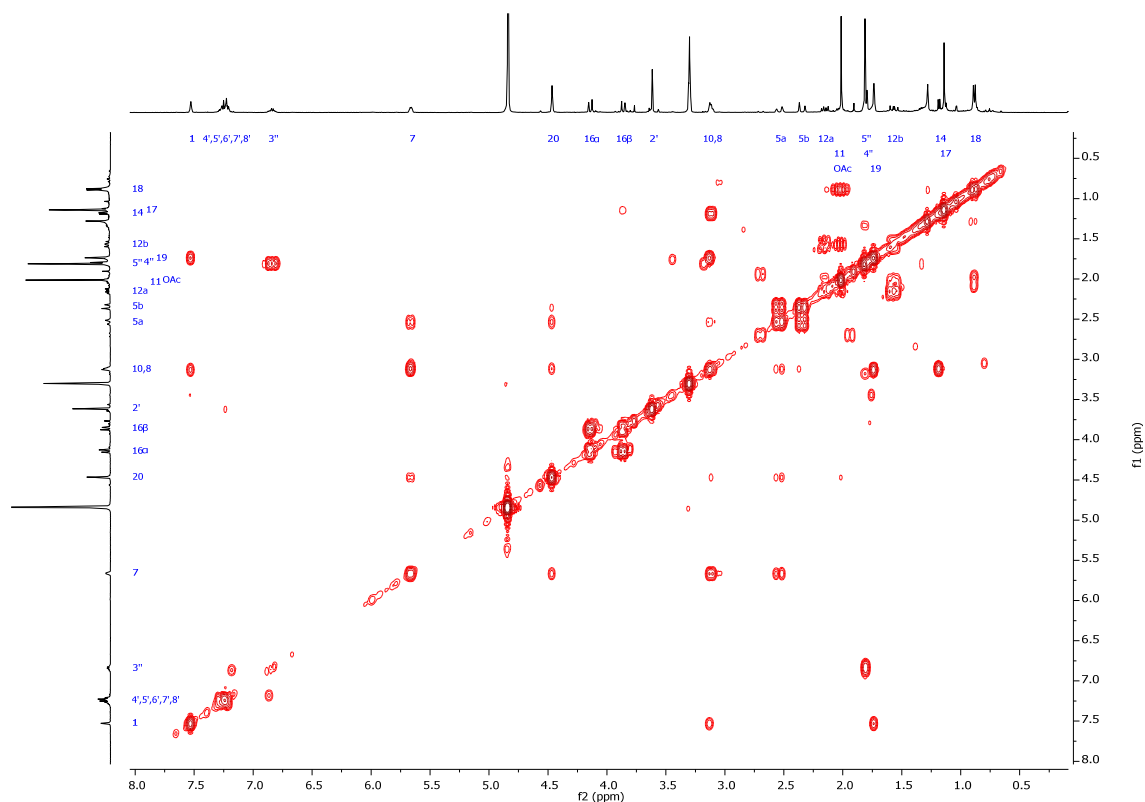

**Figure S5c.** COSY spectrum of AcDPPT (**5**) in CD<sub>3</sub>OD.

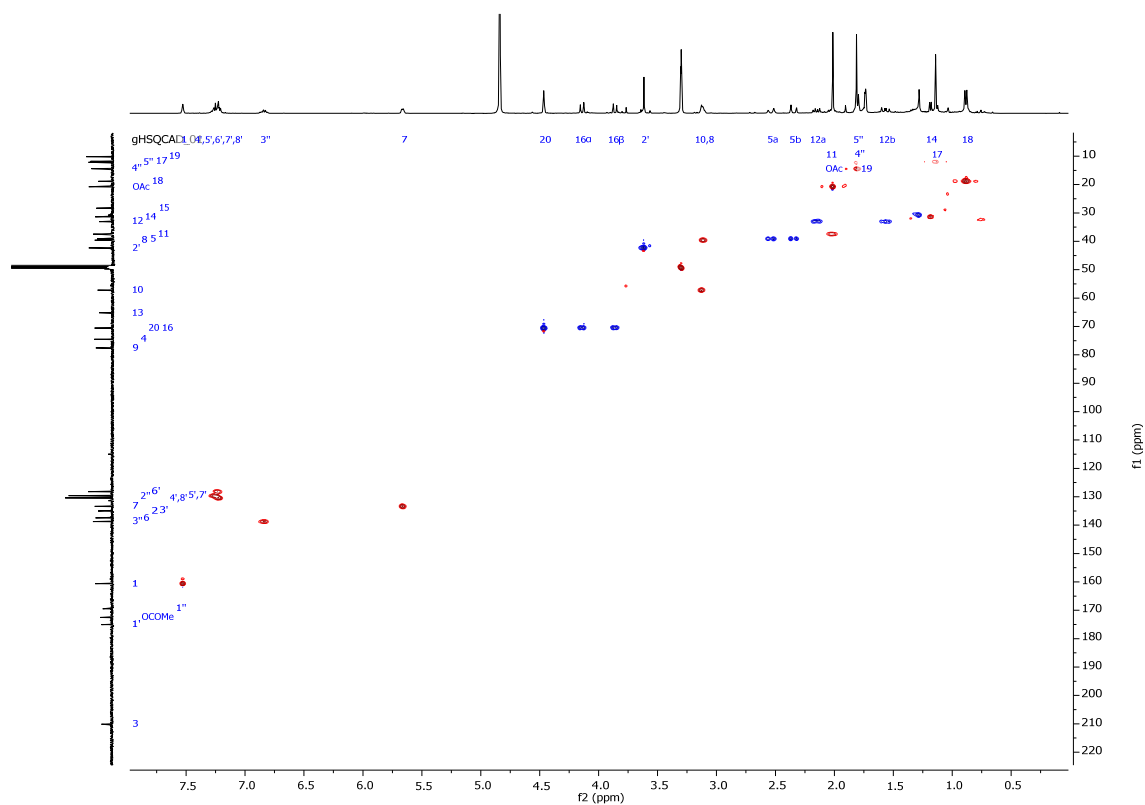

**Figure S5d.** HSQC spectrum of AcDPPT (**5**) in CD<sub>3</sub>OD.

## Supplementary Material

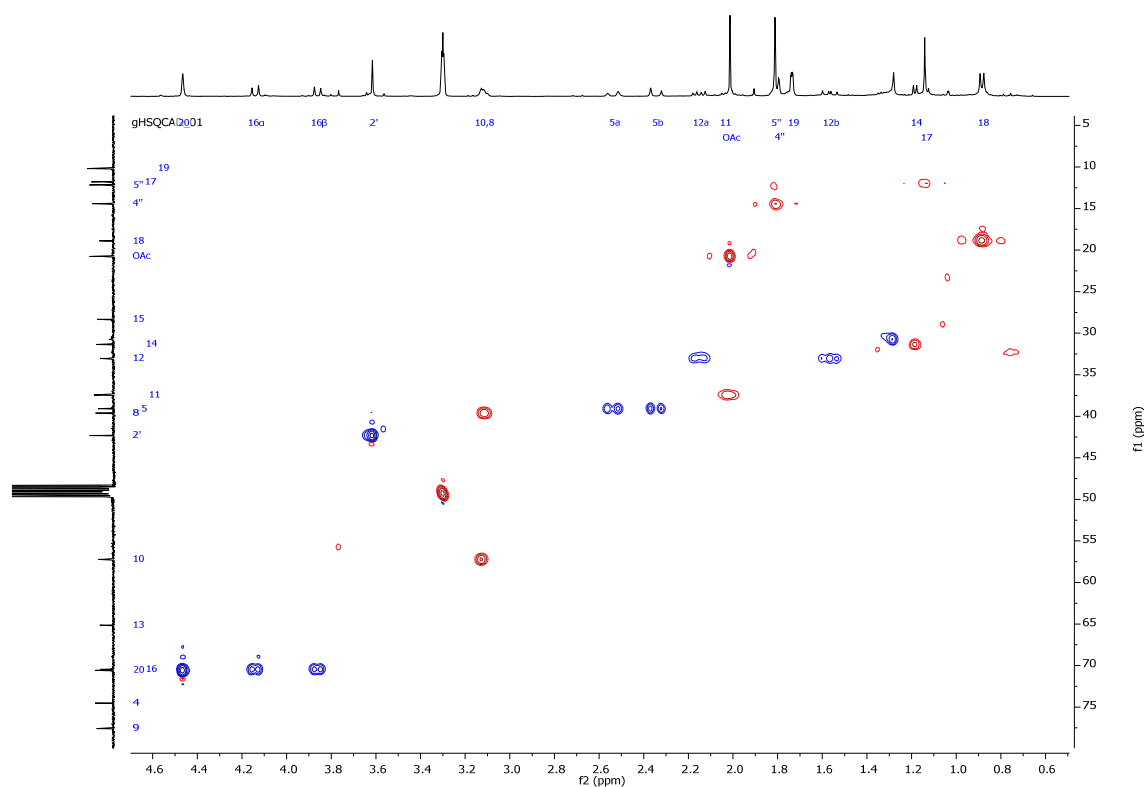

**Figure S5e.** Expansion ( $\delta_{\text{H}}$  4.7-0.5,  $\delta_{\text{C}}$  78-4) of HSQC spectrum of AcDPPT (5) in CD<sub>3</sub>OD.

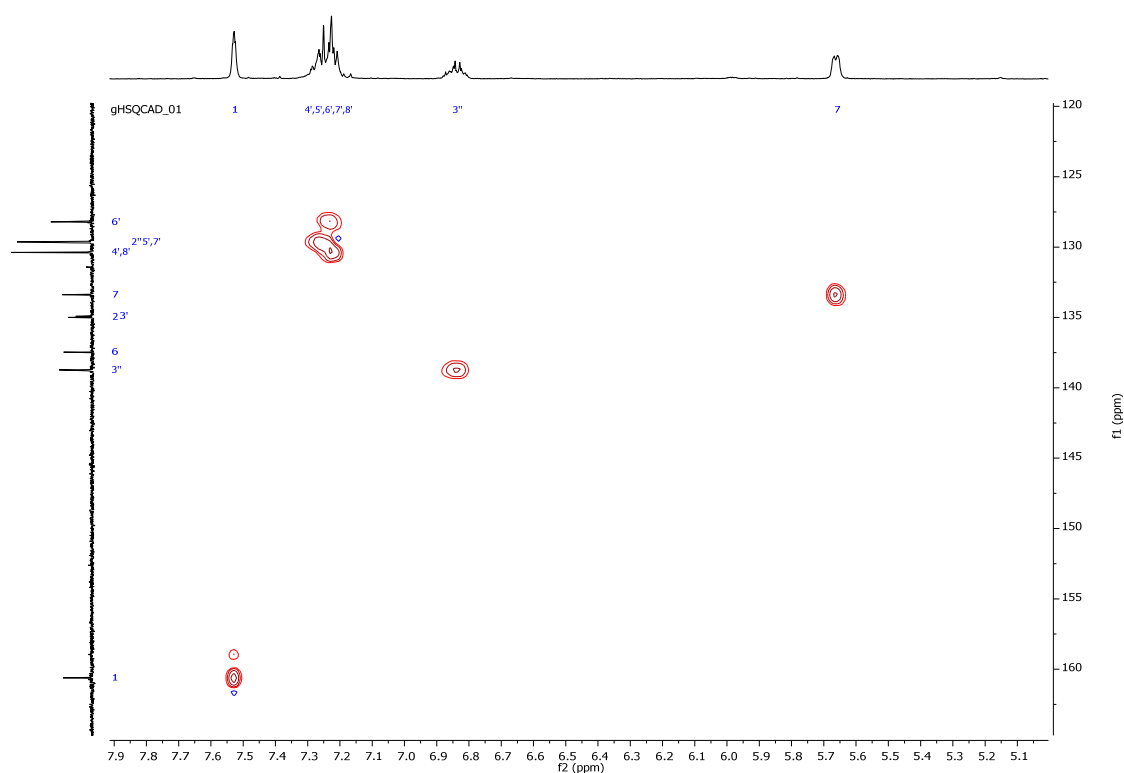

**Figure S5f.** Expansion ( $\delta_{\text{H}}$  7.9-5.0,  $\delta_{\text{C}}$  165-120) of HSQC spectrum of AcDPPT (5) in CD<sub>3</sub>OD.

# Supplementary Material

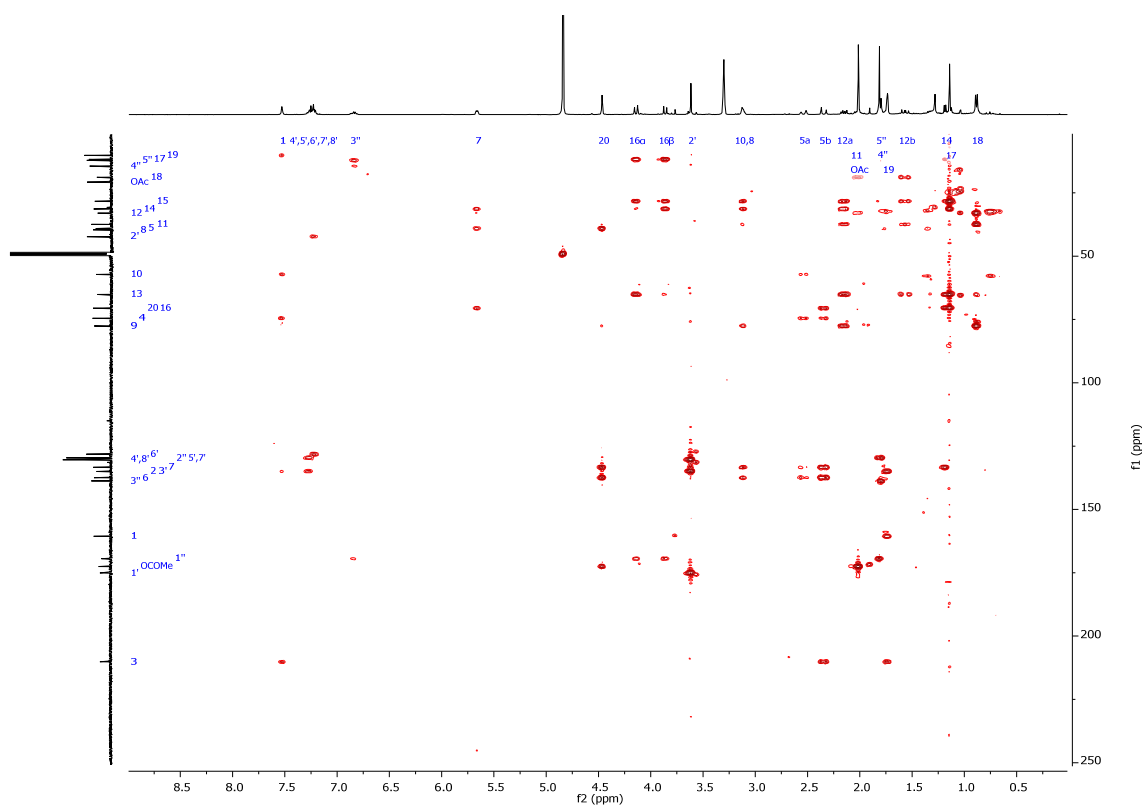

**Figure S5g.** HMBC spectrum of AcDPPT (**5**) in CD<sub>3</sub>OD.

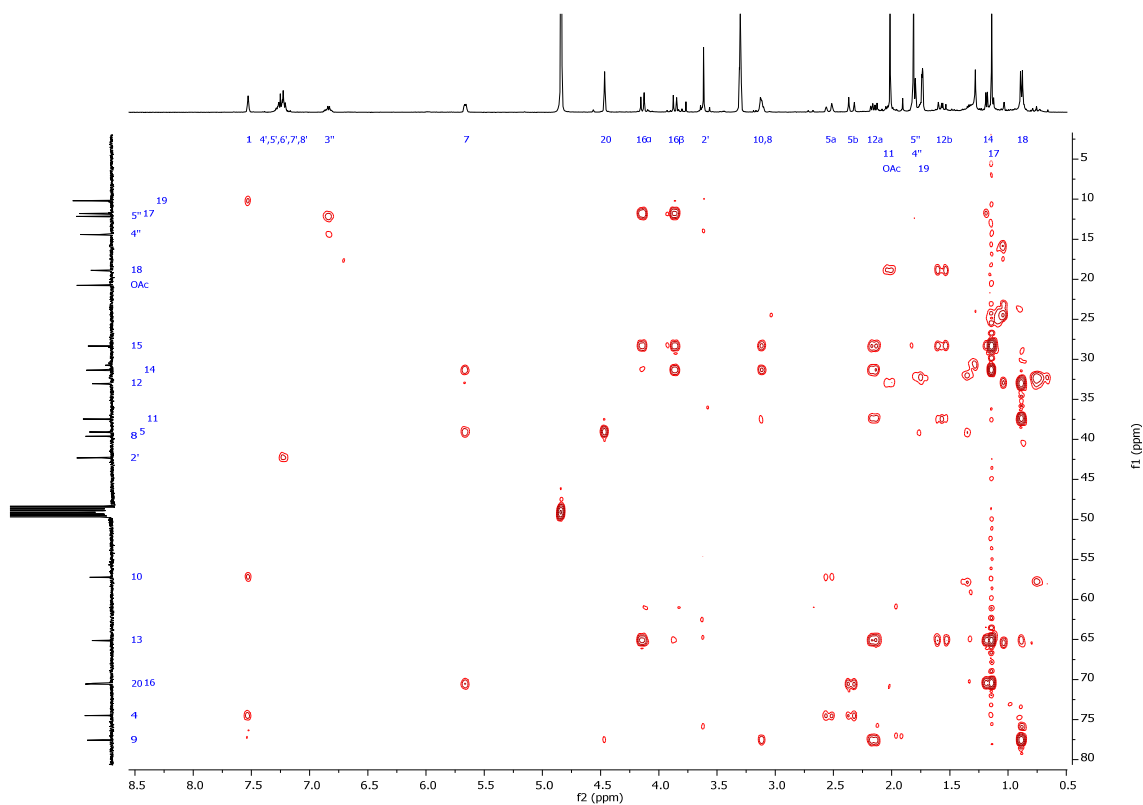

**Figure S5h.** Expansion ( $\delta_{\text{H}}$  8.5-0.5,  $\delta_{\text{C}}$  80-2) of HMBC spectrum of AcDPPT (**5**) in CD<sub>3</sub>OD.



## Supplementary Material

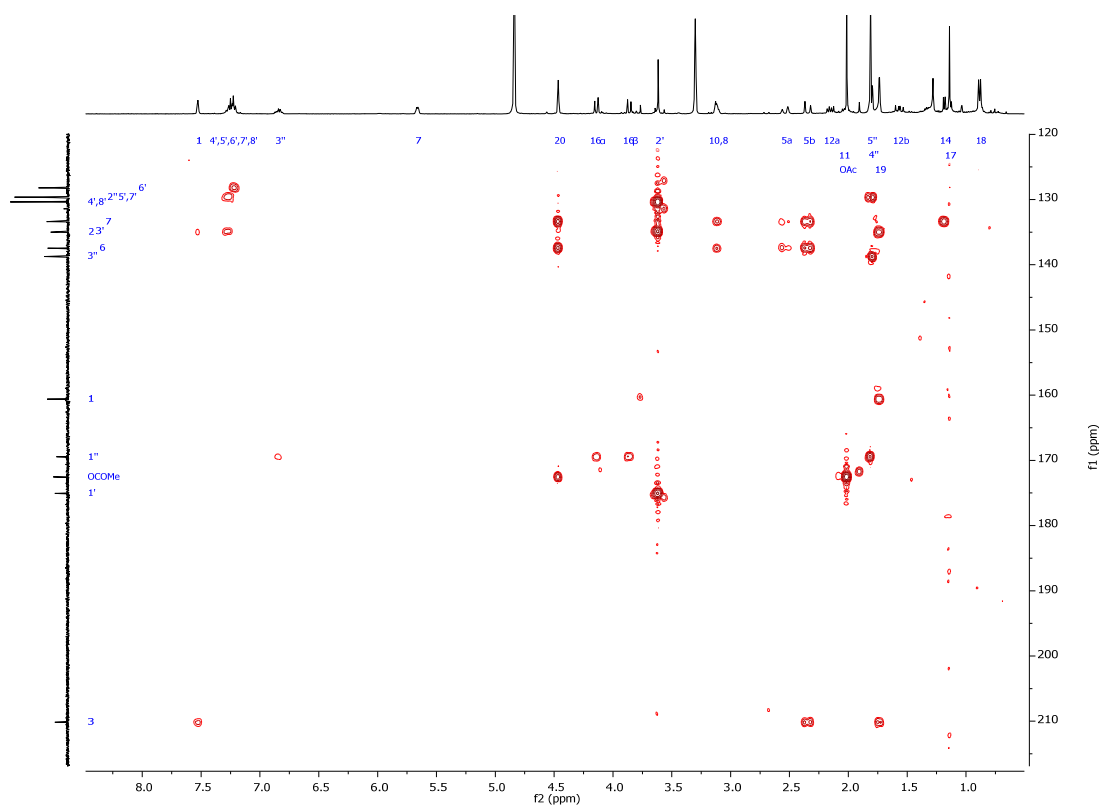

**Figure S5i.** Expansion ( $\delta_{\text{H}}$  8.5-0.5,  $\delta_{\text{C}}$  215-120) of HMBC spectrum of AcDPPT (**5**) in  $\text{CD}_3\text{OD}$ .

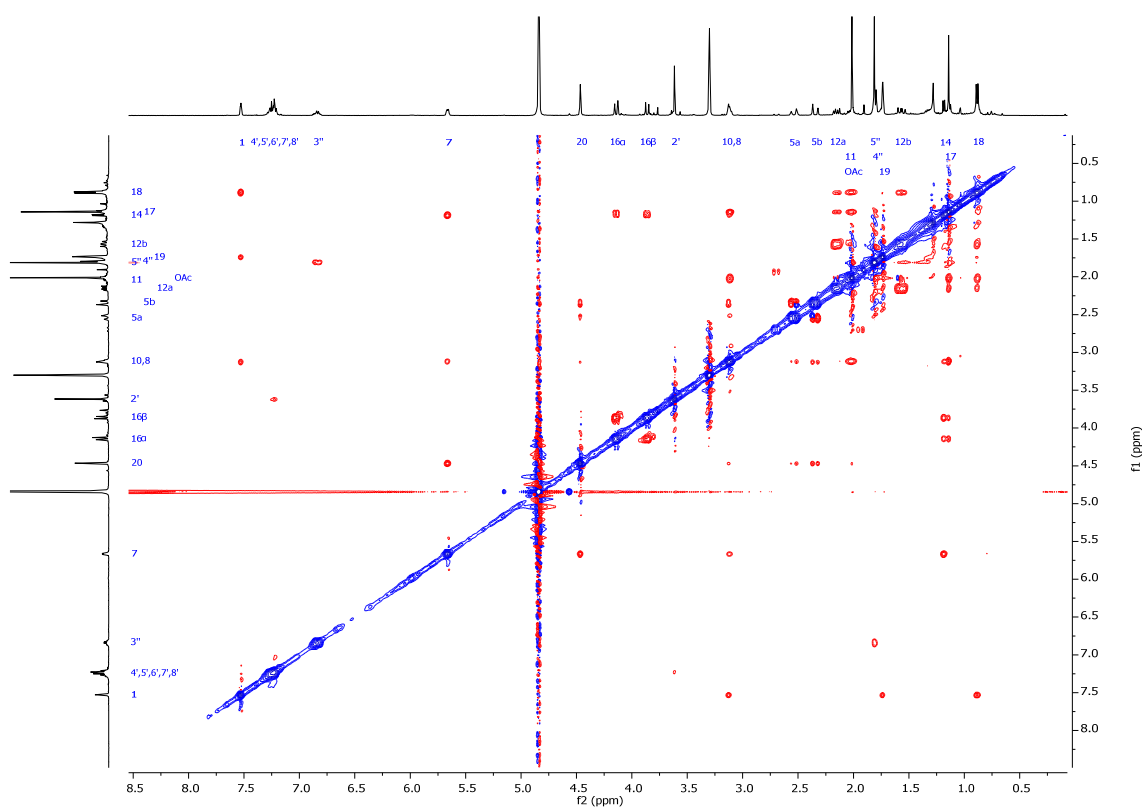

**Figure S5j.** NOESY2D spectrum of AcDPPT (**5**) in  $\text{CD}_3\text{OD}$ .

# Supplementary Material

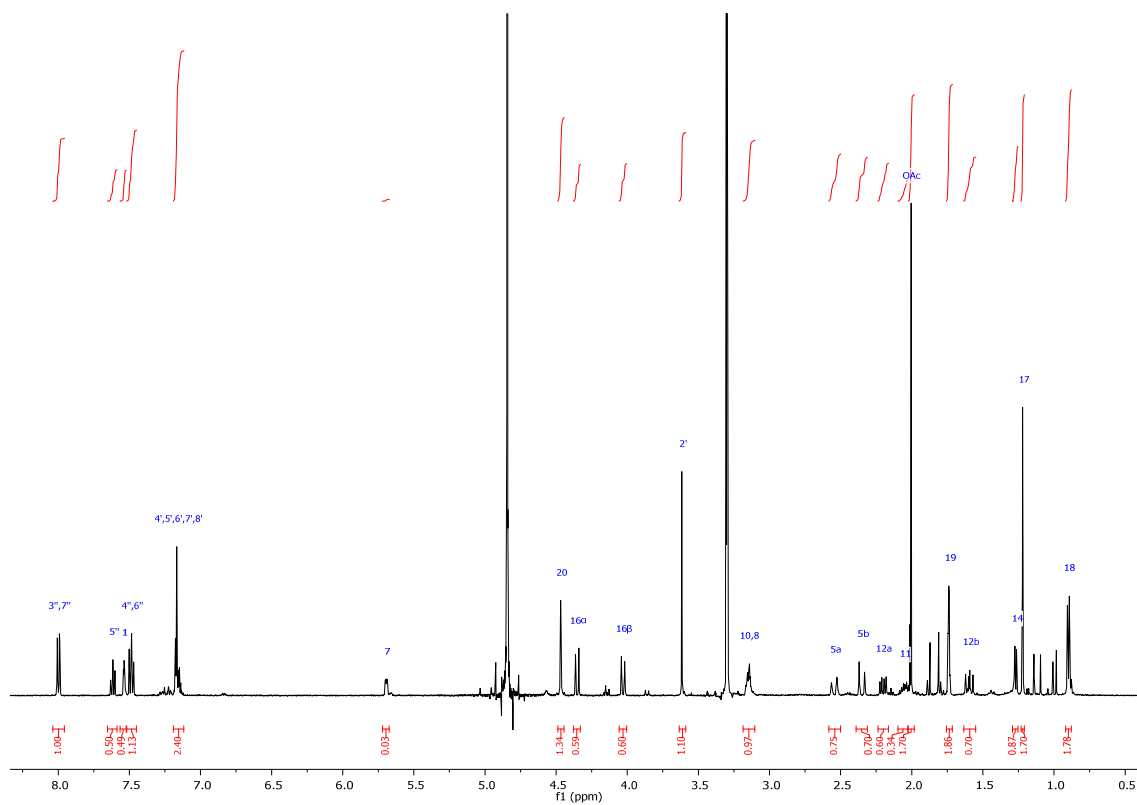

**Figure S6a.**  $^1\text{H}$ -NMR spectrum of AcDPPBz (**6**) in  $\text{CD}_3\text{OD}$  (400 MHz).

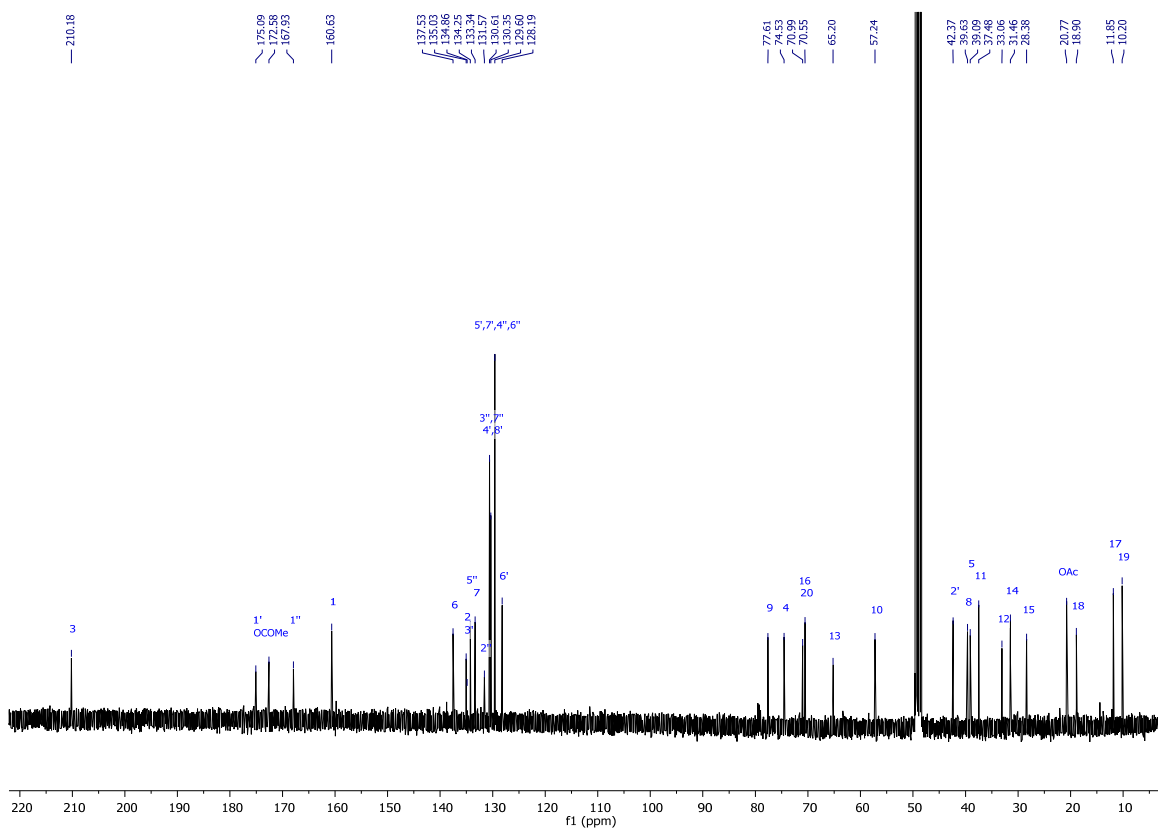

**Figure S6b.**  $^{13}\text{C}$ -NMR spectrum of AcDPPBz (**6**) in  $\text{CD}_3\text{OD}$  (125 MHz).

## Supplementary Material

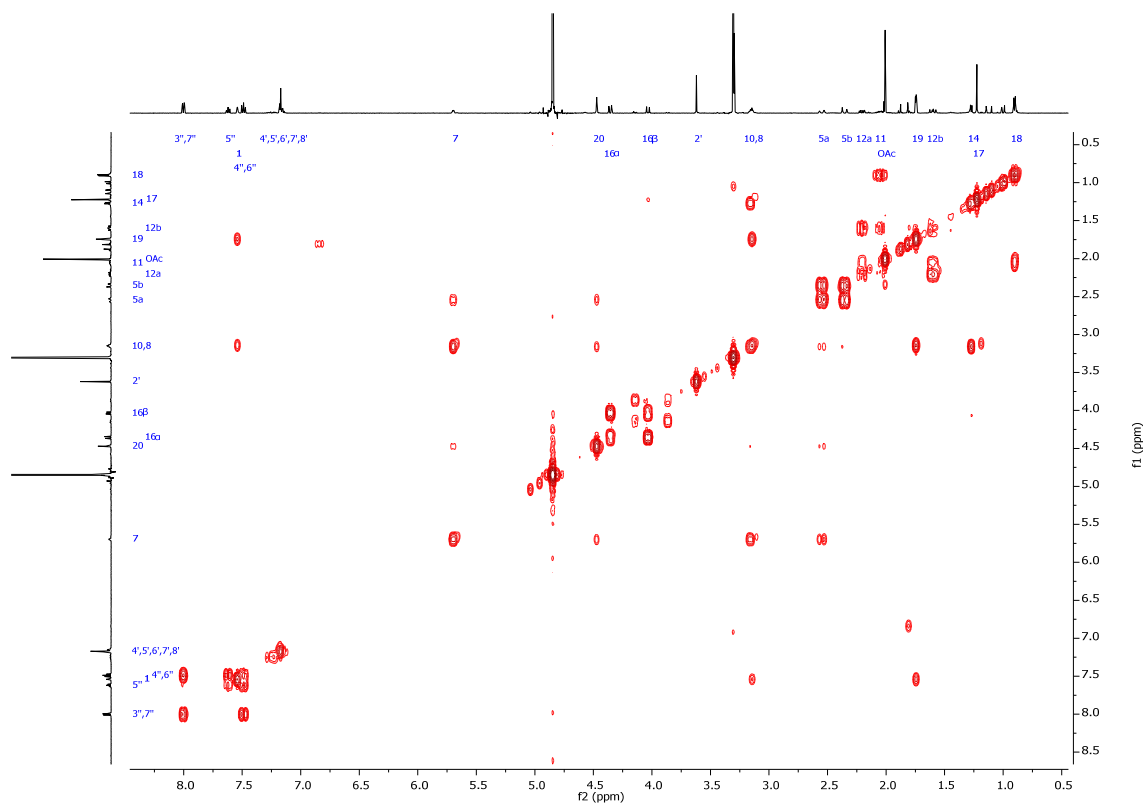

**Figure S6c.** COSY spectrum of AcDPPBz (**6**) in CD<sub>3</sub>OD.

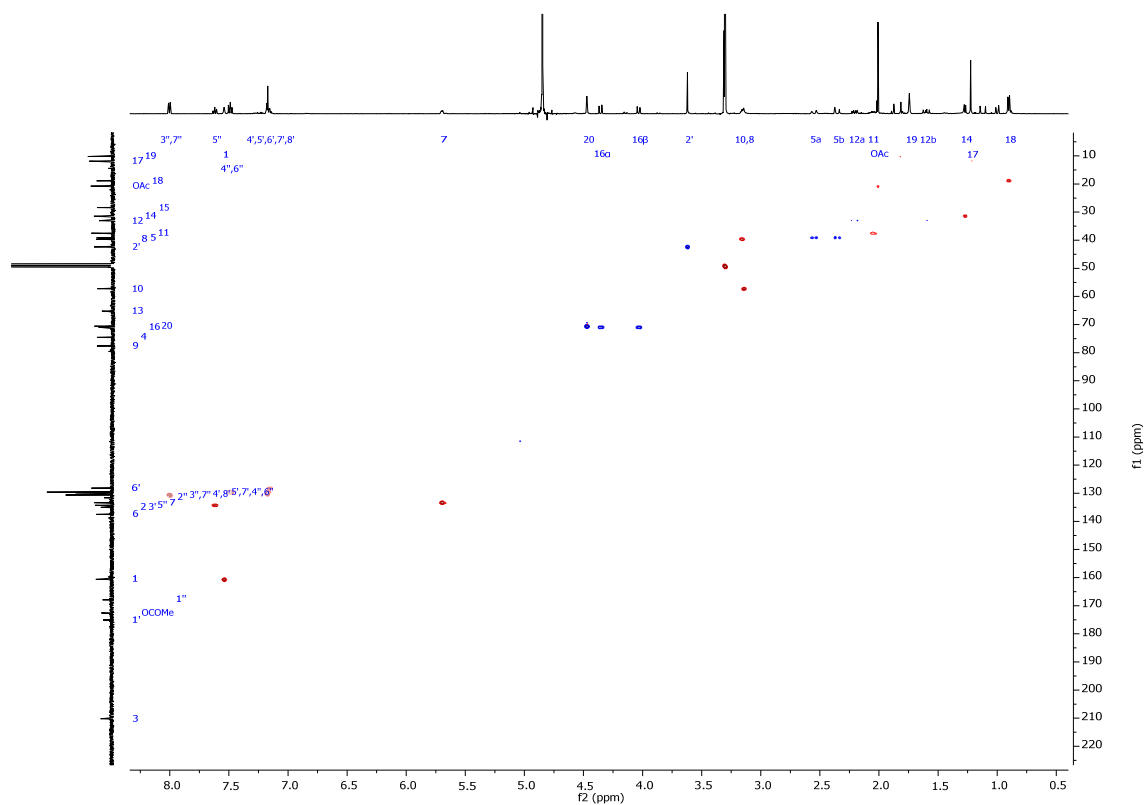

**Figure S6d.** HSQC spectrum of AcDPPBz (**6**) in CD<sub>3</sub>OD.

# Supplementary Material

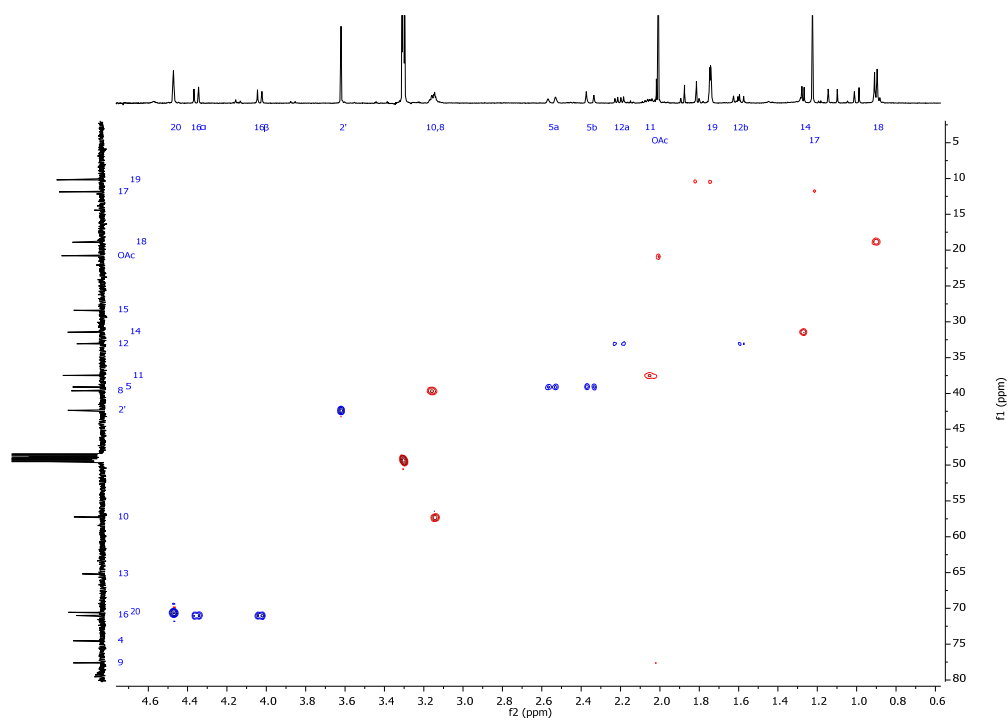

**Figure S6e.** Expansion ( $\delta_{\text{H}}$  4.7-0.6,  $\delta_{\text{C}}$  80-4) of HSQC spectrum of AcDPPBz (**6**) in  $\text{CD}_3\text{OD}$ .

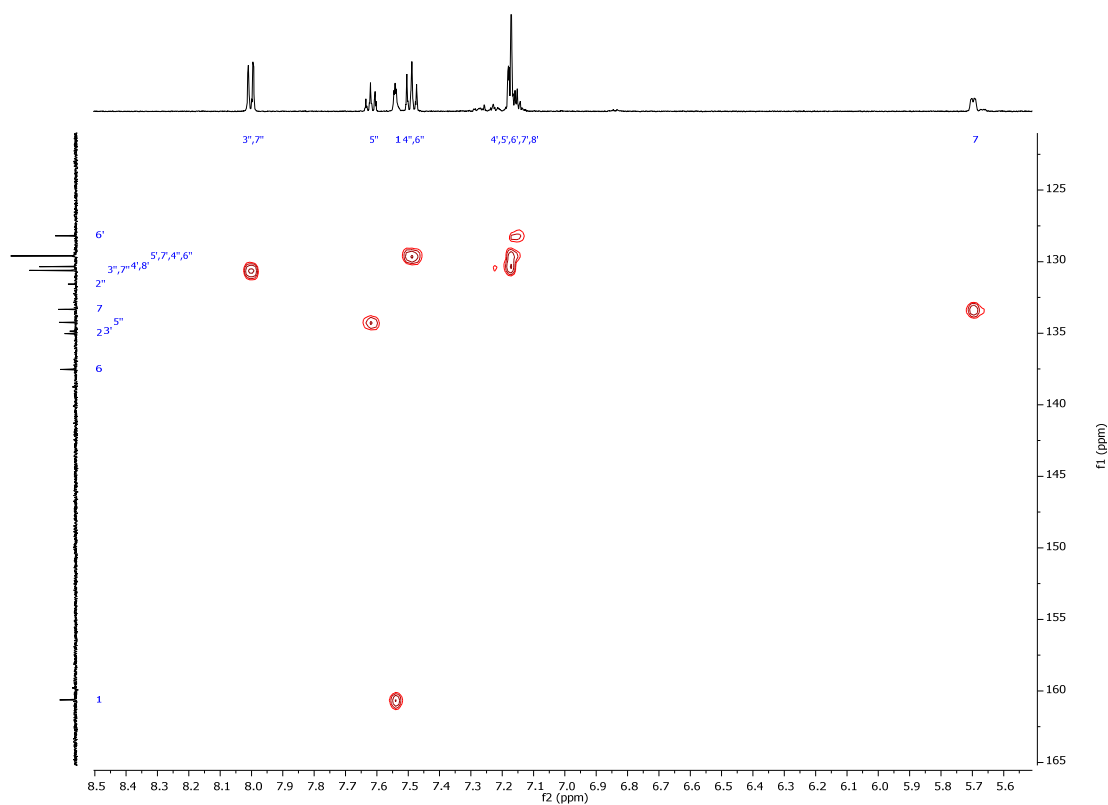

**Figure S6f.** Expansion ( $\delta_{\text{H}}$  8.5-5.5,  $\delta_{\text{C}}$  165-123) of HSQC spectrum of AcDPPBz (**6**) in  $\text{CD}_3\text{OD}$ .

## Supplementary Material

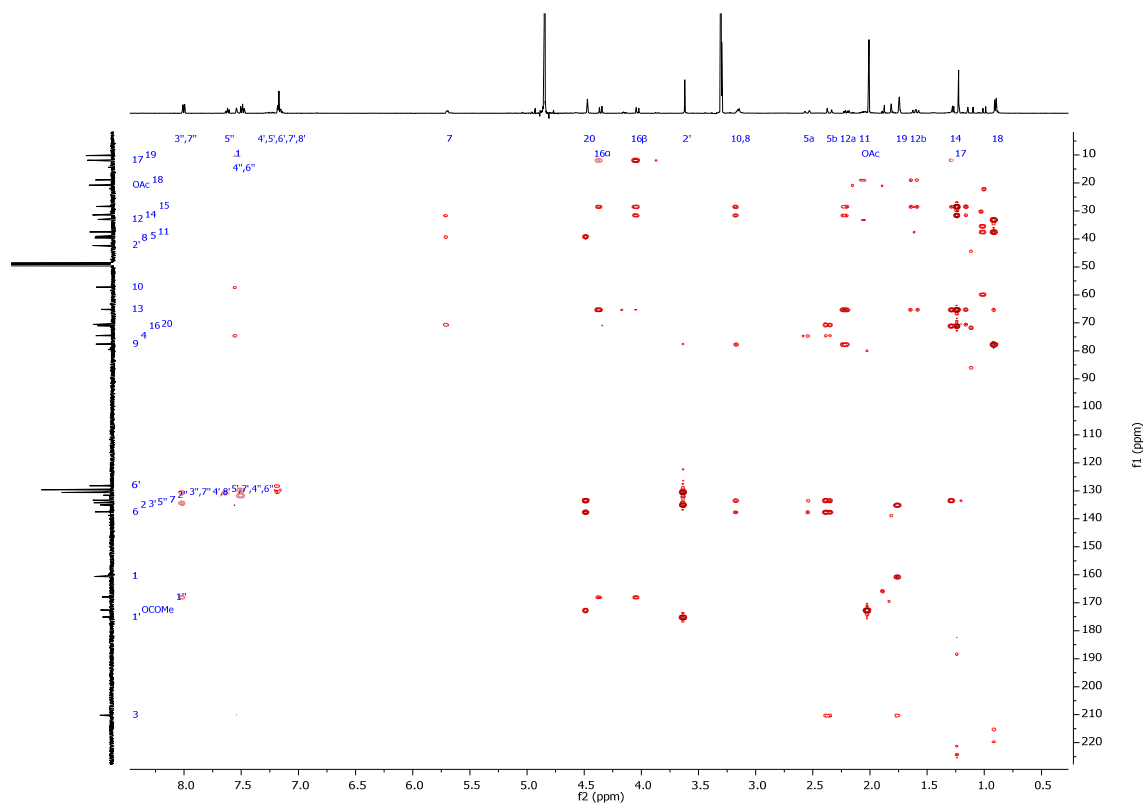

**Figure S6g.** HMBC spectrum of AcDPPBz (**6**) in CD<sub>3</sub>OD.

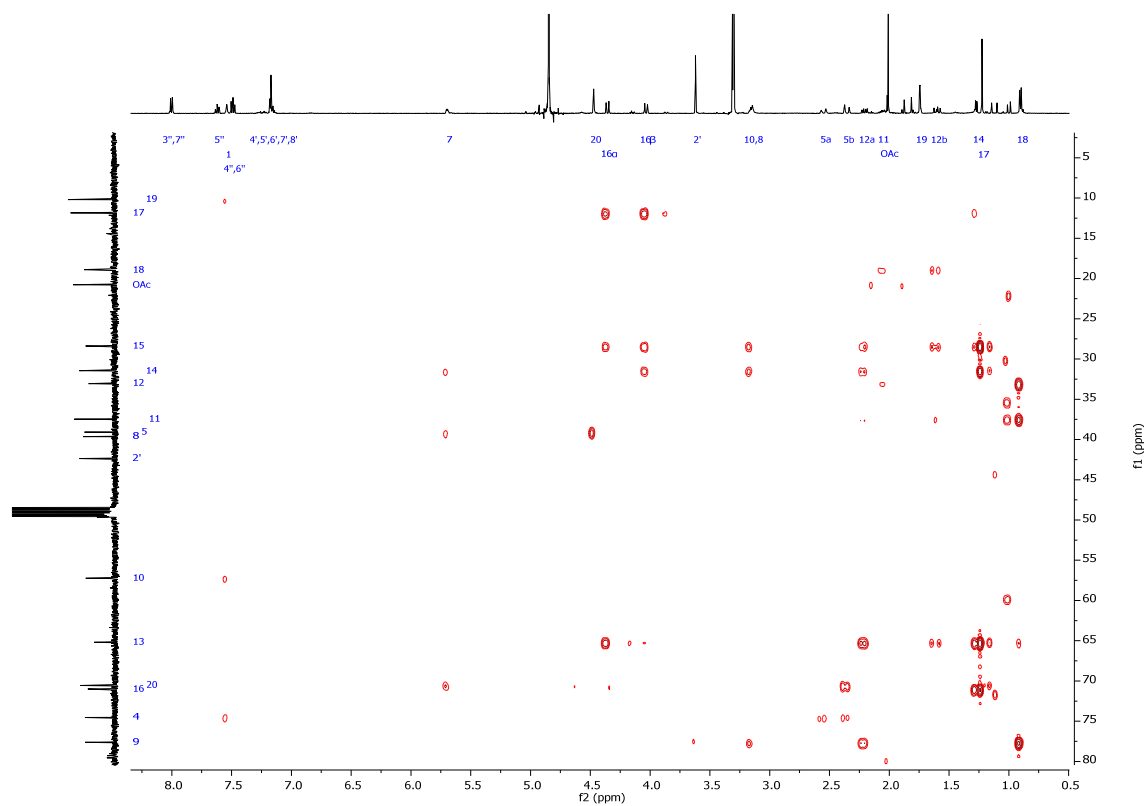

**Figure S6h.** Expansion ( $\delta_H$  8.3-0.5,  $\delta_C$  80-3) of HMBC spectrum of AcDPPBz (**6**) in CD<sub>3</sub>OD.

## Supplementary Material

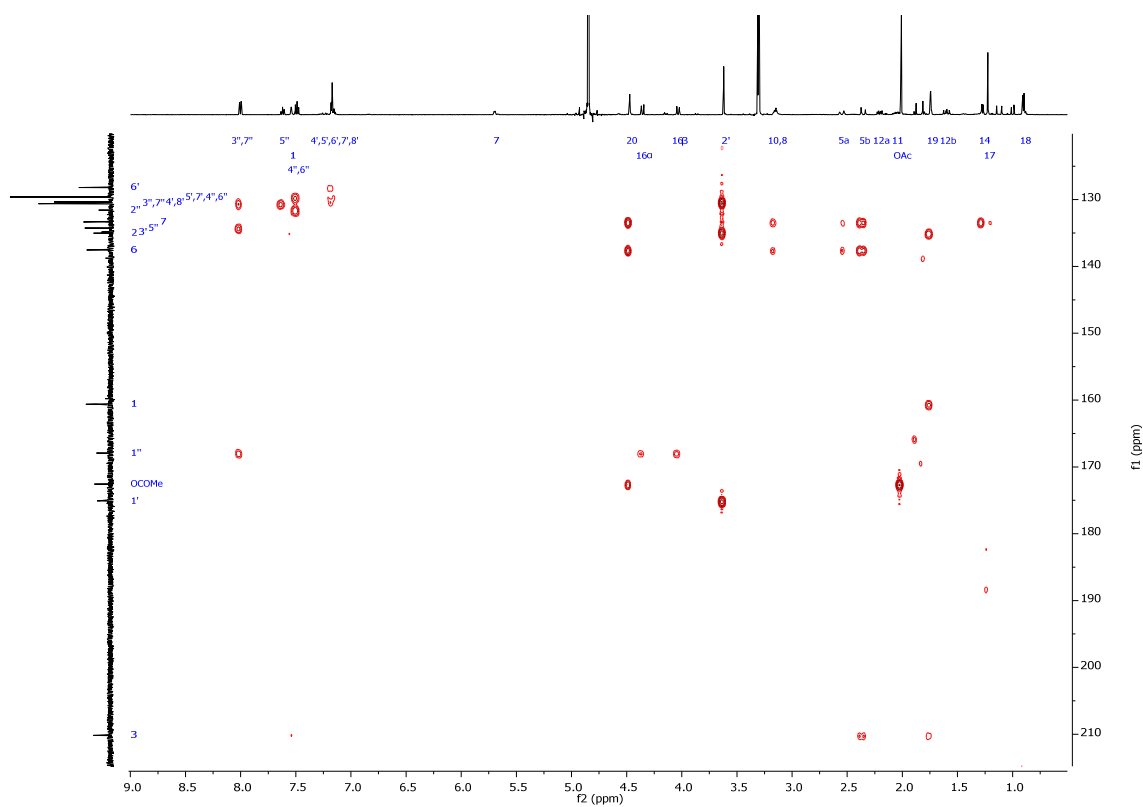

**Figure S6i.** Expansion ( $\delta_{\text{H}}$  9.0-0.5,  $\delta_{\text{C}}$  215-120) of HMBC spectrum of AcDPPBz (**6**) in  $\text{CD}_3\text{OD}$ .

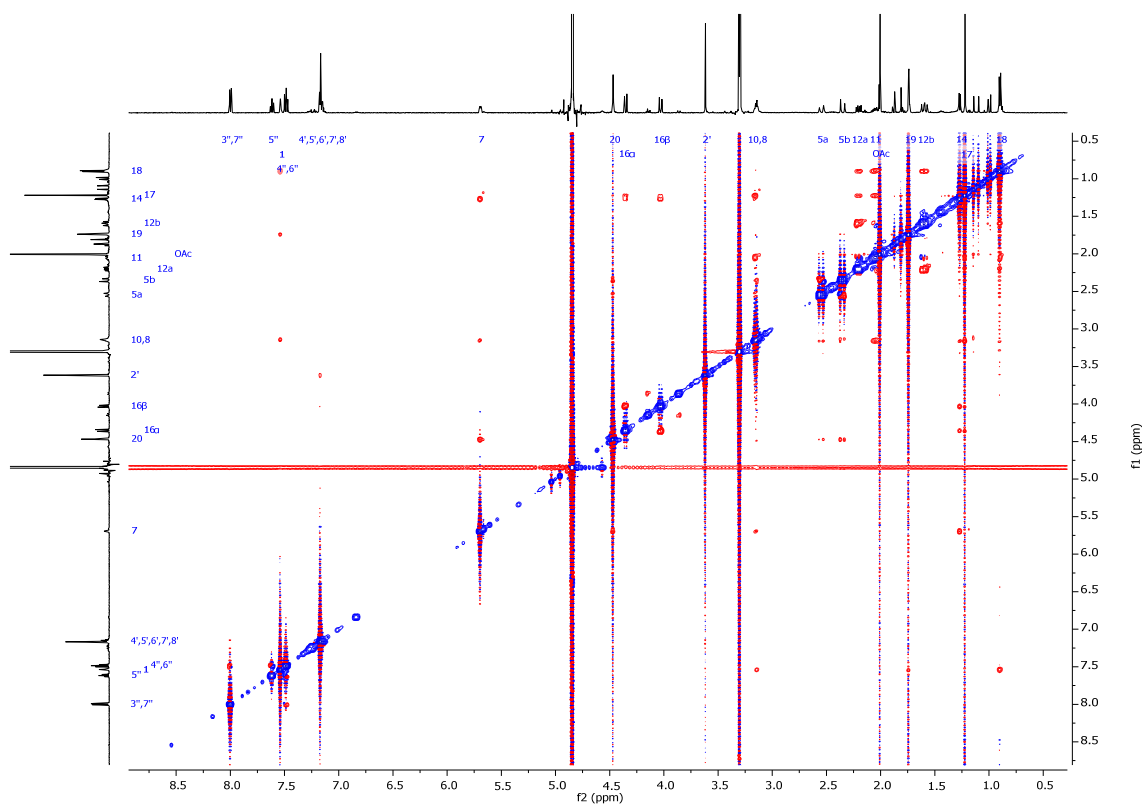

**Figure S6j.** NOESY2D spectrum of AcDPPBz (**6**) in  $\text{CD}_3\text{OD}$ .

# Supplementary Material

PROTON\_01

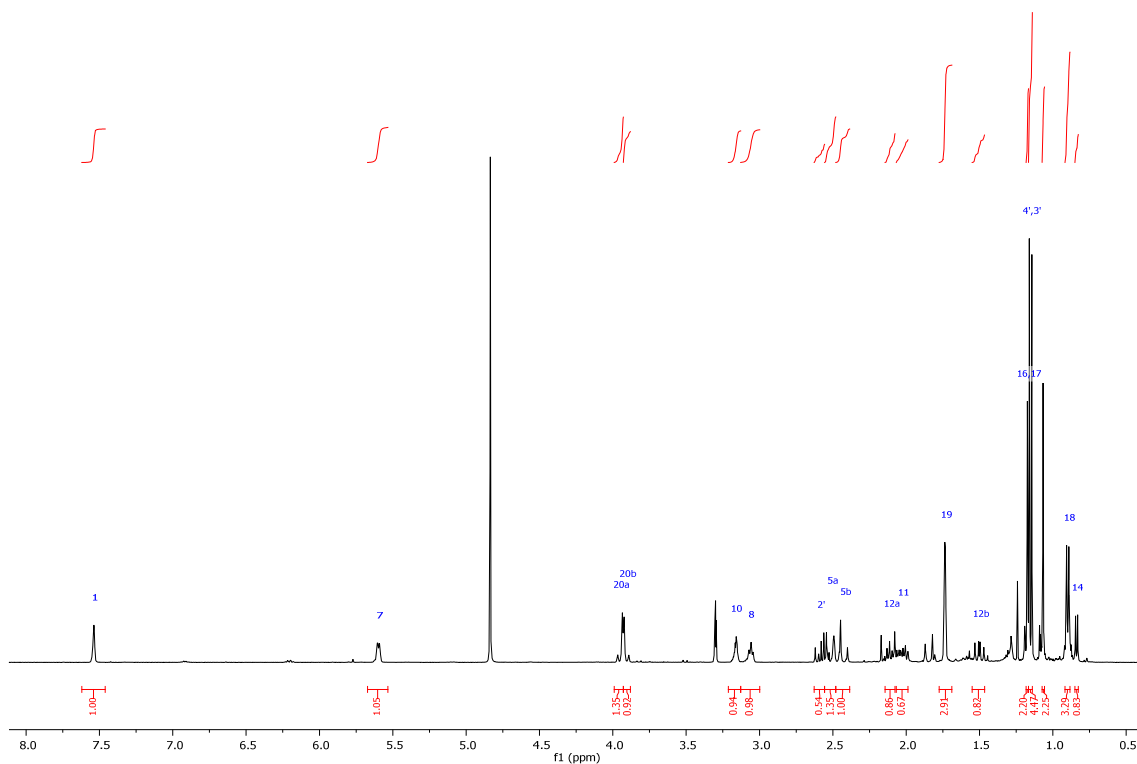

**Figure S7a.**  $^1\text{H}$ -NMR spectrum of DPB (7) in  $\text{CDCl}_3$  (400 MHz).

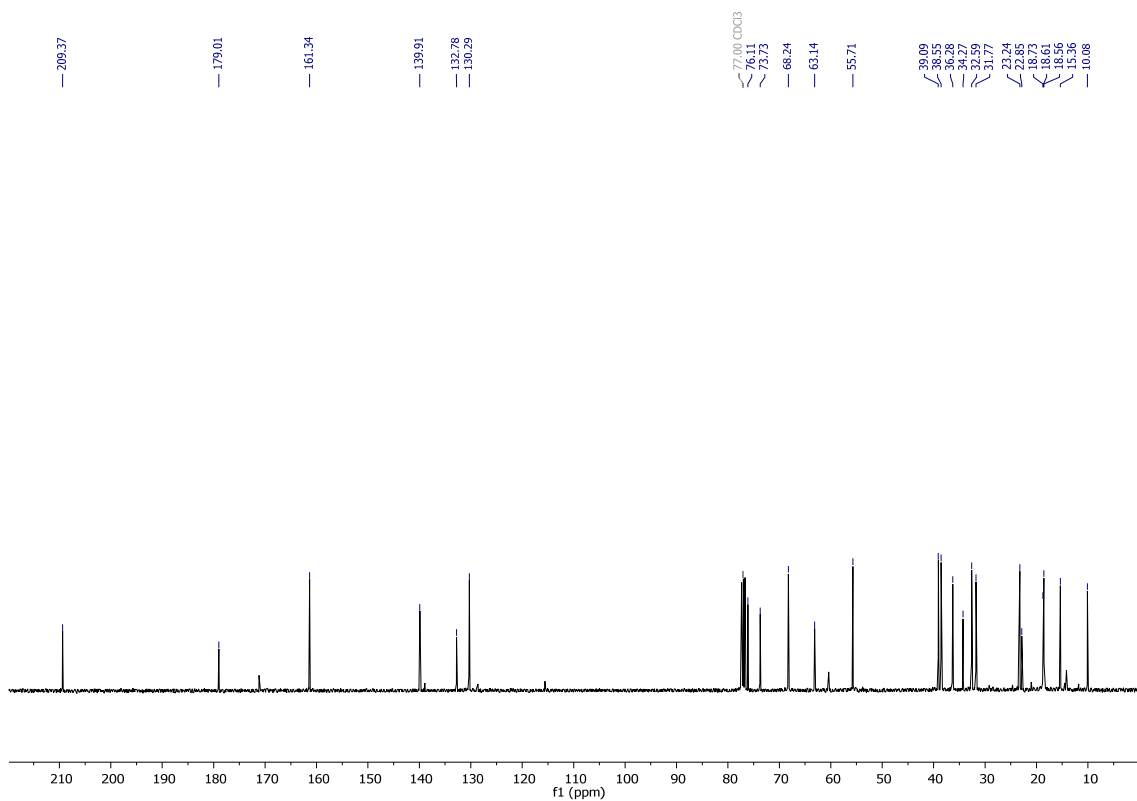

**Figure S7b.**  $^{13}\text{C}$ -NMR spectrum of DPB (7) in  $\text{CDCl}_3$  (100 MHz).

# Supplementary Material

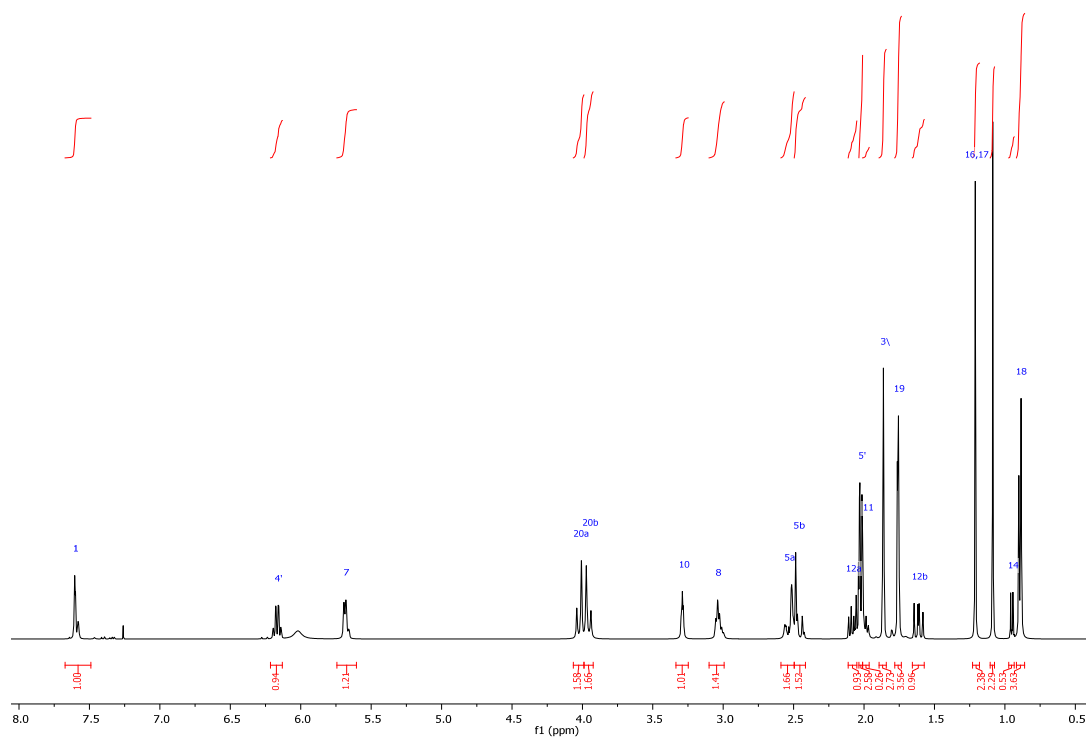

**Figure S8a.** <sup>1</sup>H-NMR spectrum of DPA (**8**) in CDCl<sub>3</sub> (400 MHz).

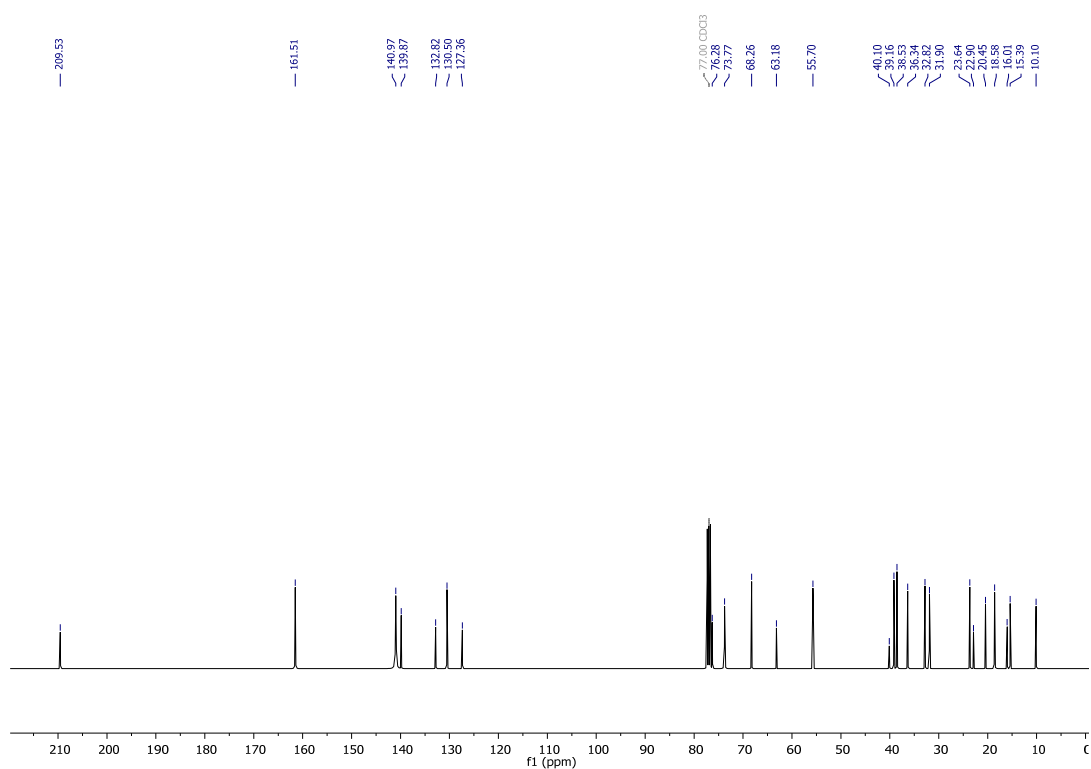

**Figure S8b.** <sup>13</sup>C-NMR spectrum of DPA (**8**) in CDCl<sub>3</sub> (100 MHz).



# Supplementary Material

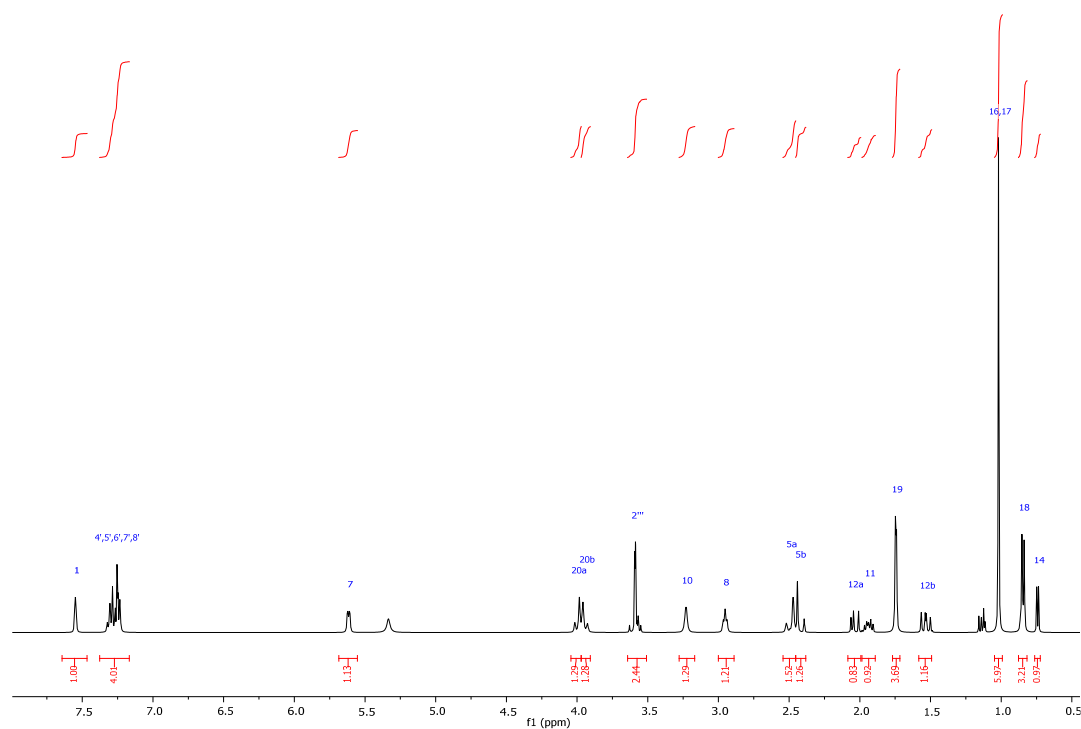

**Figure S9a.** <sup>1</sup>H-NMR spectrum of DPP (9) in CDCl<sub>3</sub> (400 MHz).

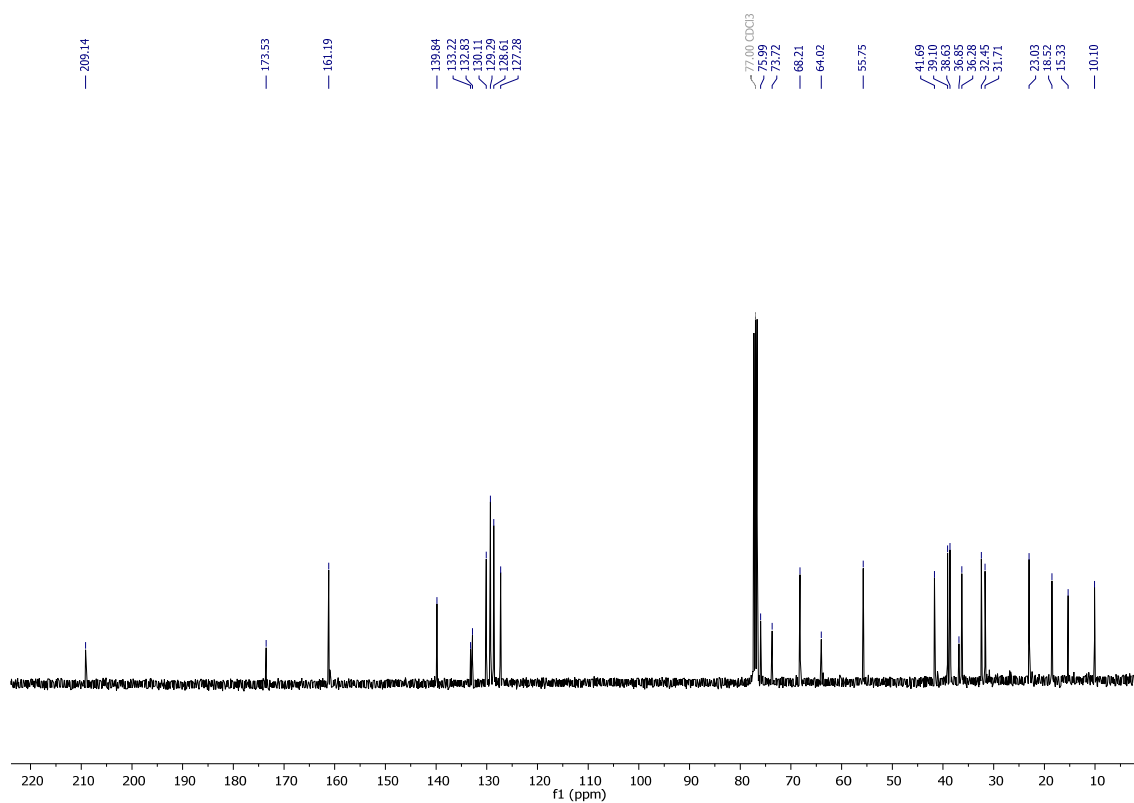

**Figure S9b.** <sup>13</sup>C-NMR of DPP (9) in CDCl<sub>3</sub> (100 MHz).

Supplementary Material

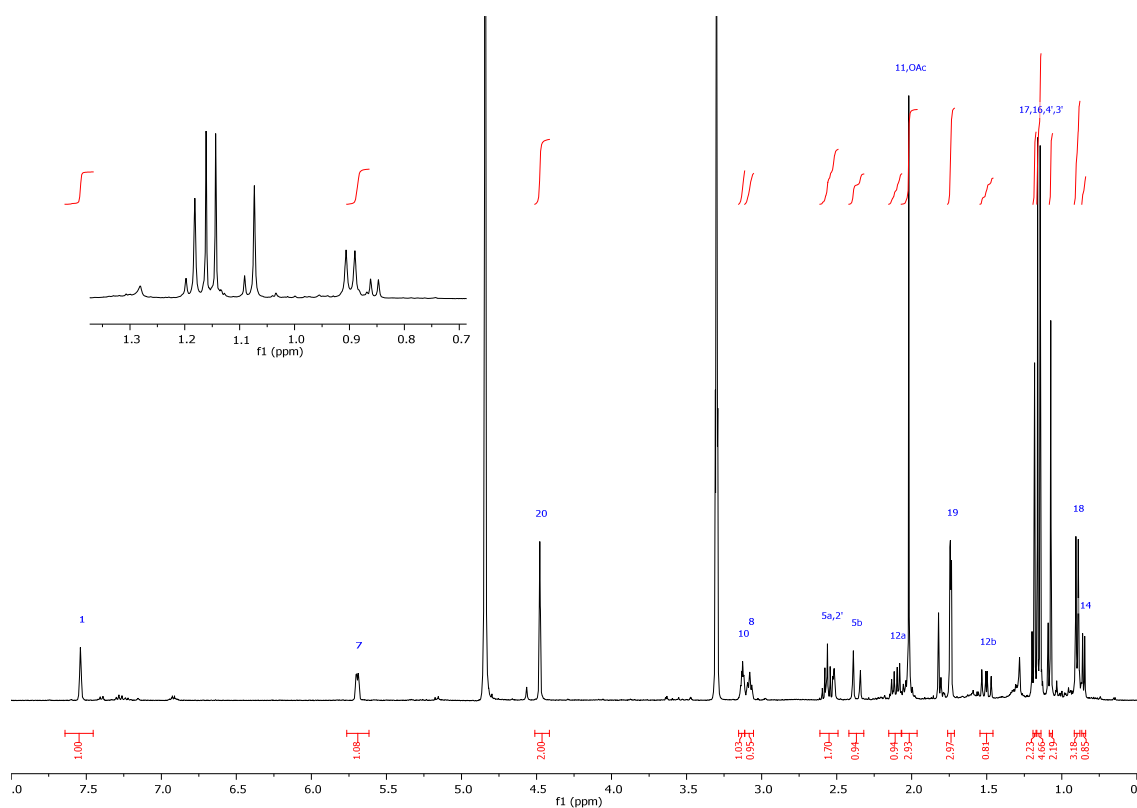

Figure S10a. <sup>1</sup>H-NMR spectrum of AcDPB (10) in CD<sub>3</sub>OD (400 MHz).

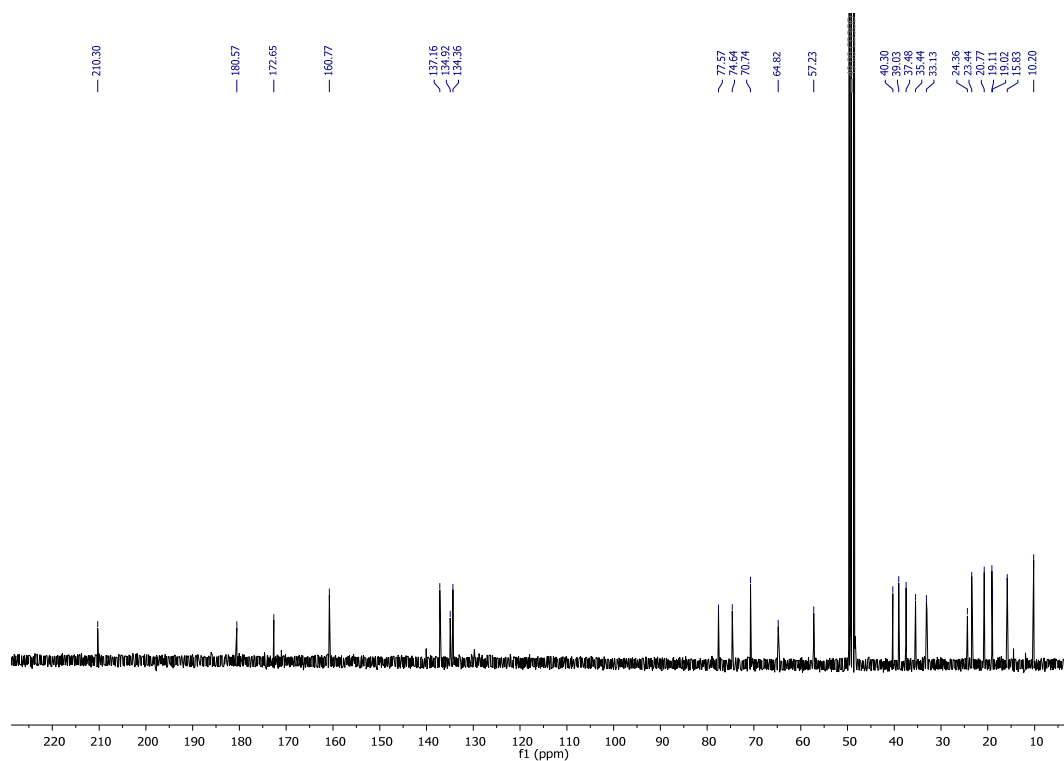

Figure S10b. <sup>13</sup>C-NMR spectrum of AcDPB (10) in CD<sub>3</sub>OD (100 MHz).

# Supplementary Material

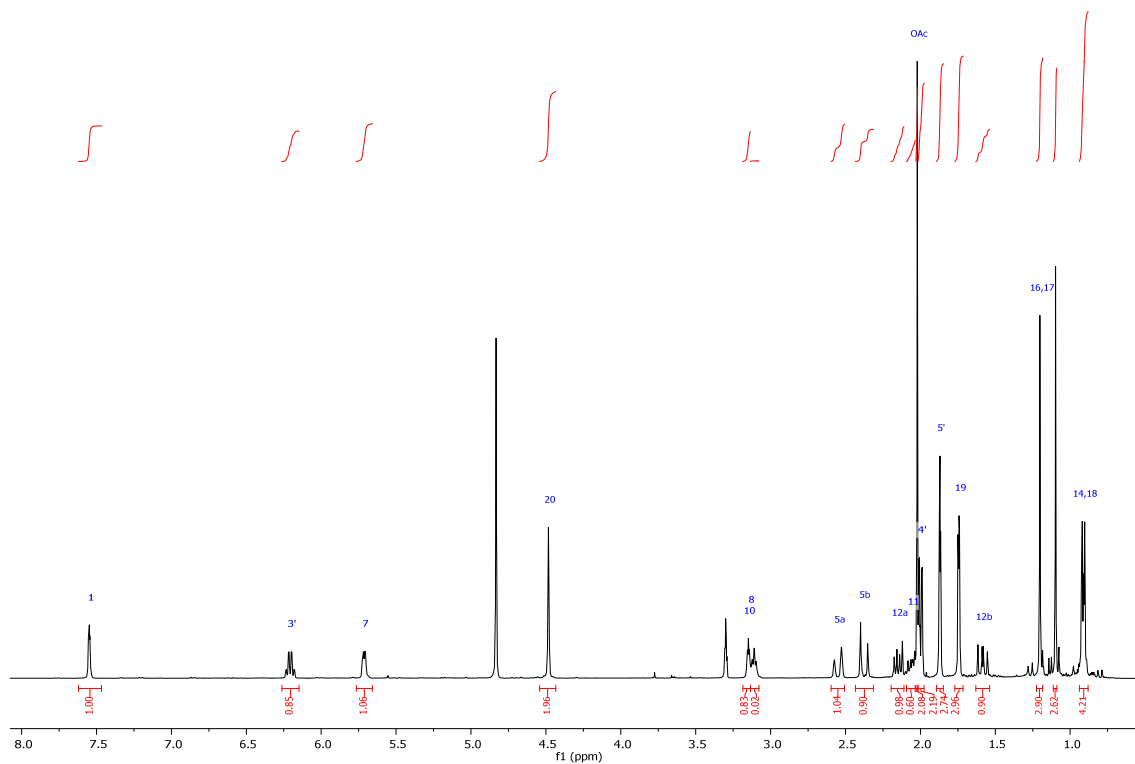

**Figure S11a.** <sup>1</sup>H-NMR spectrum AcDPA (11) in CD<sub>3</sub>OD (400 MHz).

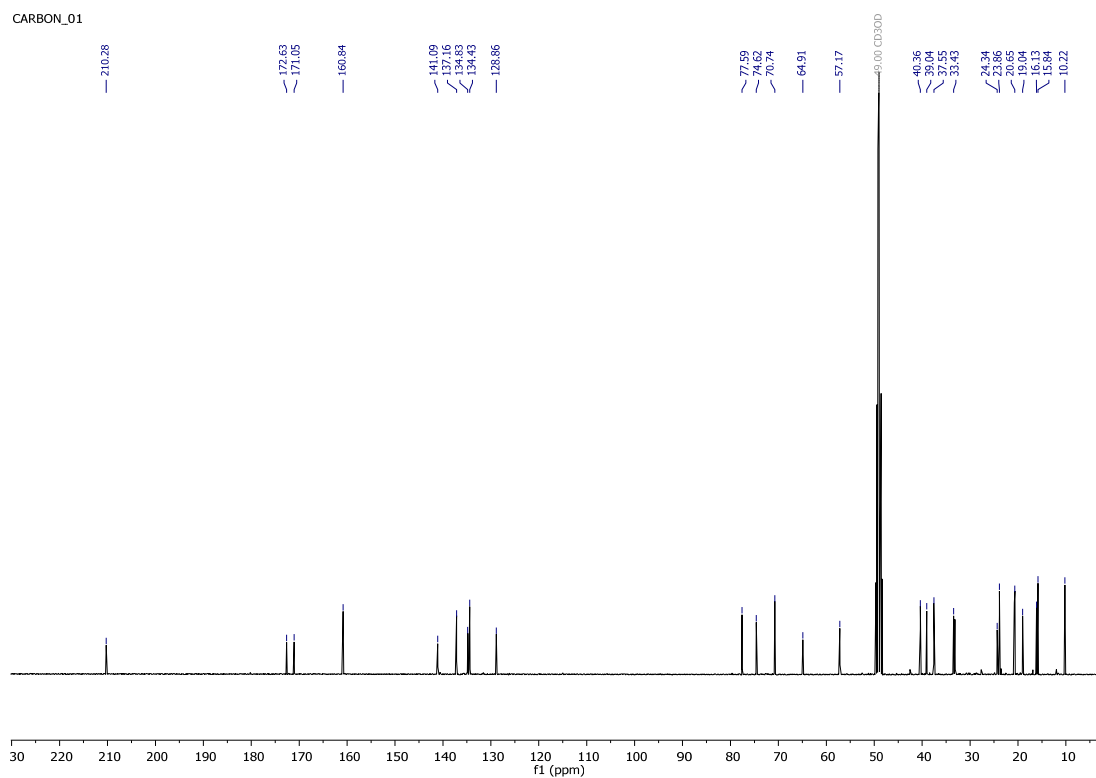

**Figure S11b.** <sup>13</sup>C-NMR spectrum of AcDPA (11) in CD<sub>3</sub>OD (100 MHz).

# Supplementary Material

PROTON\_01

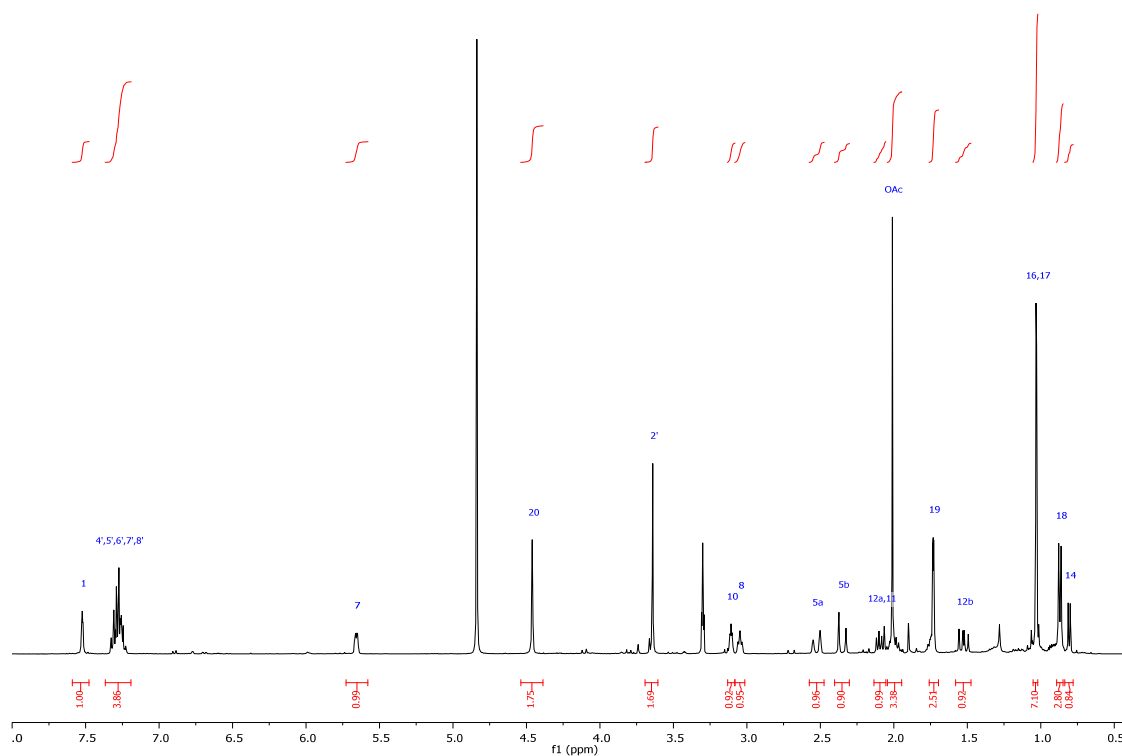

**Figure S12a.** <sup>1</sup>H-NMR spectrum of AcDPP (12) in CD<sub>3</sub>OD (400 MHz).

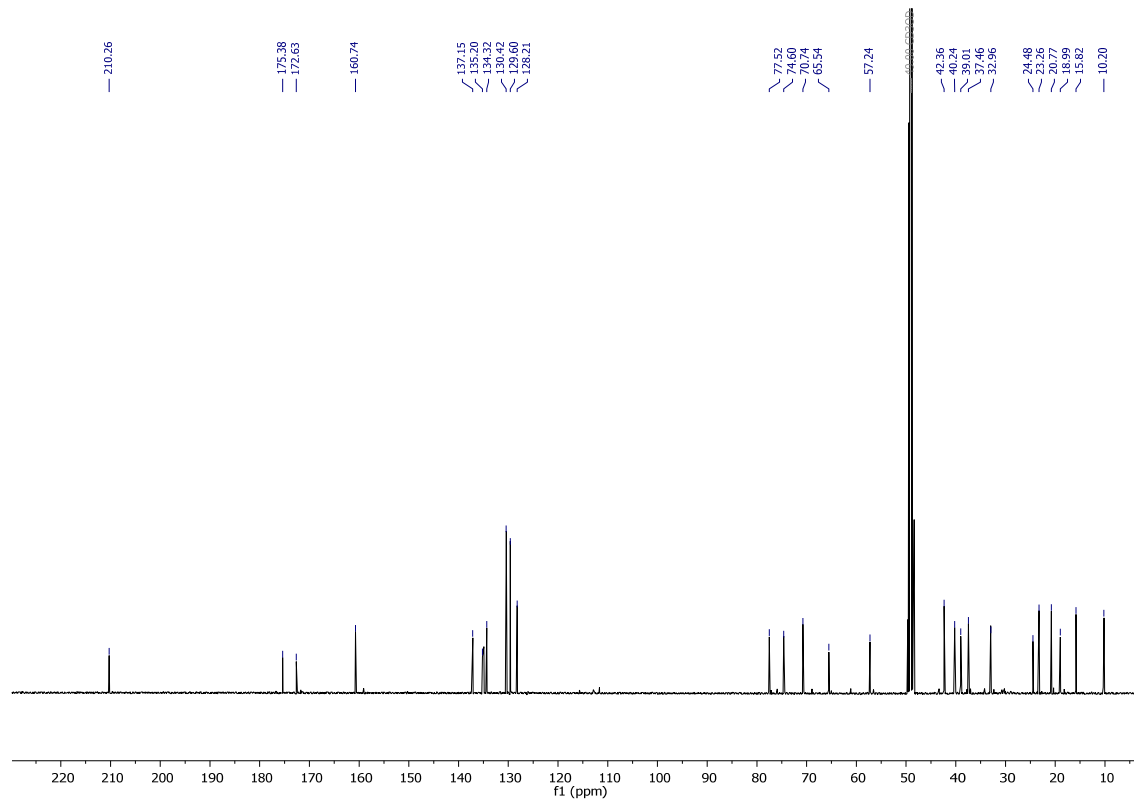

**Figure S12b.** <sup>13</sup>C-NMR spectrum of AcDPP (12) in CD<sub>3</sub>OD (100 MHz).

# Supplementary Material

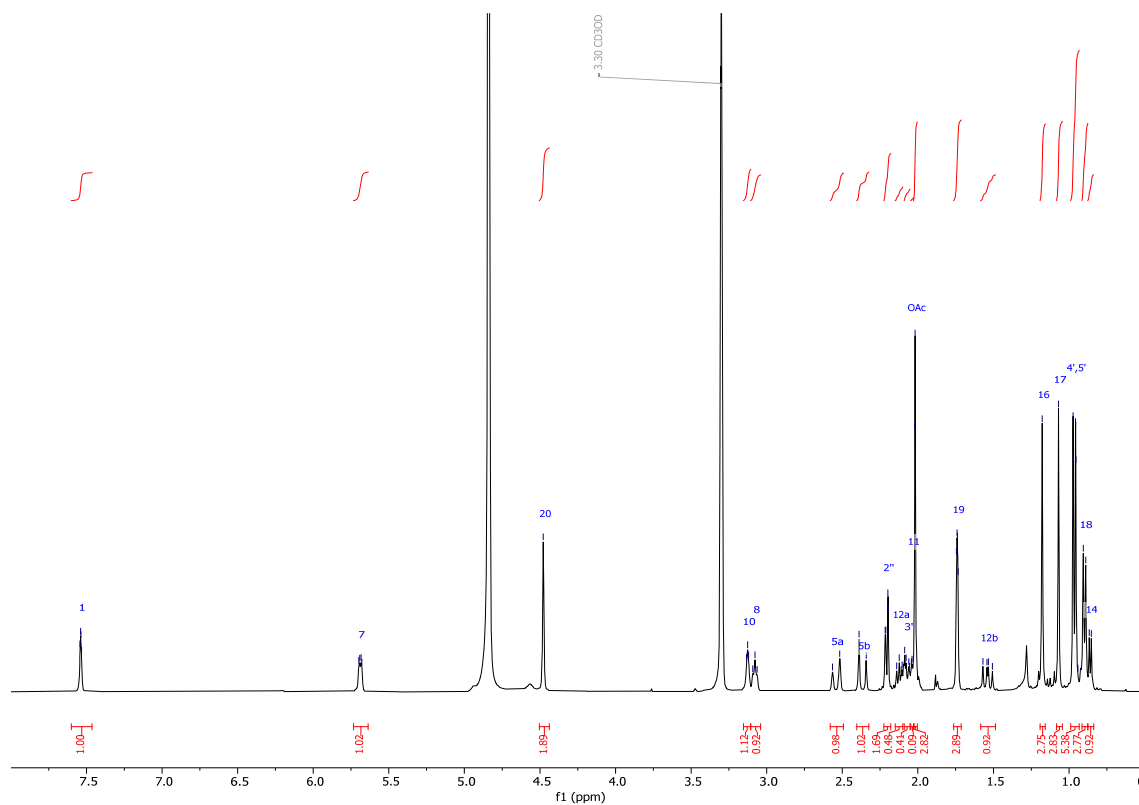

**Figure S13a.** <sup>1</sup>H-NMR spectrum of AcDPiPn (13) in CD<sub>3</sub>OD (500 MHz).

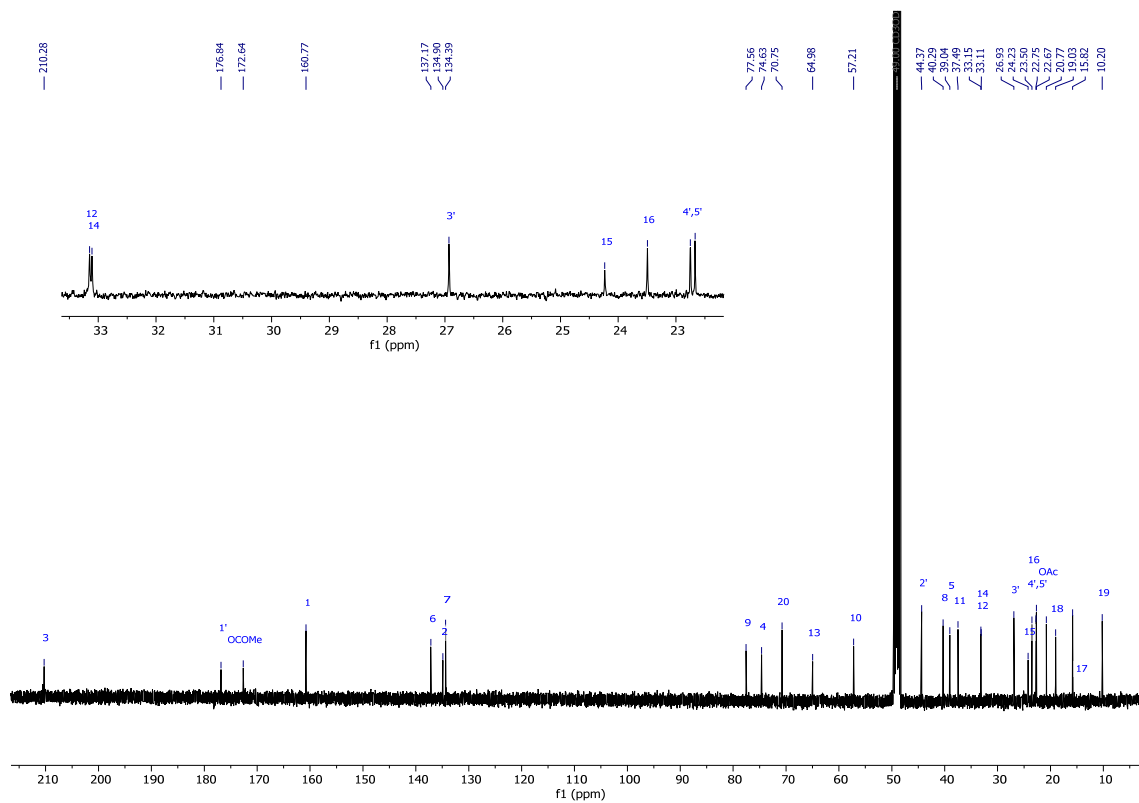

**Figure S13b.** <sup>13</sup>C-NMR spectrum of AcDPiPn (13) in CD<sub>3</sub>OD (125 MHz).

## Supplementary Material

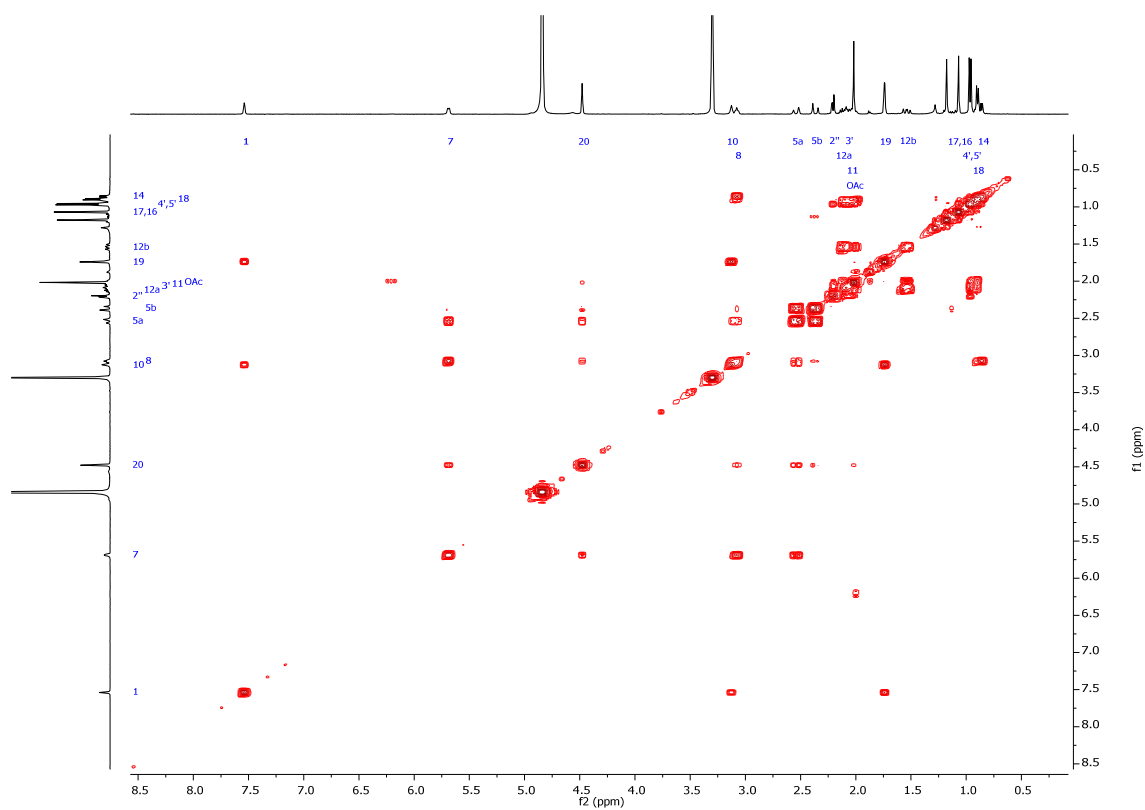

**Figure S13c.** COSY spectrum of AcDPiPn (**13**) in CD<sub>3</sub>OD.

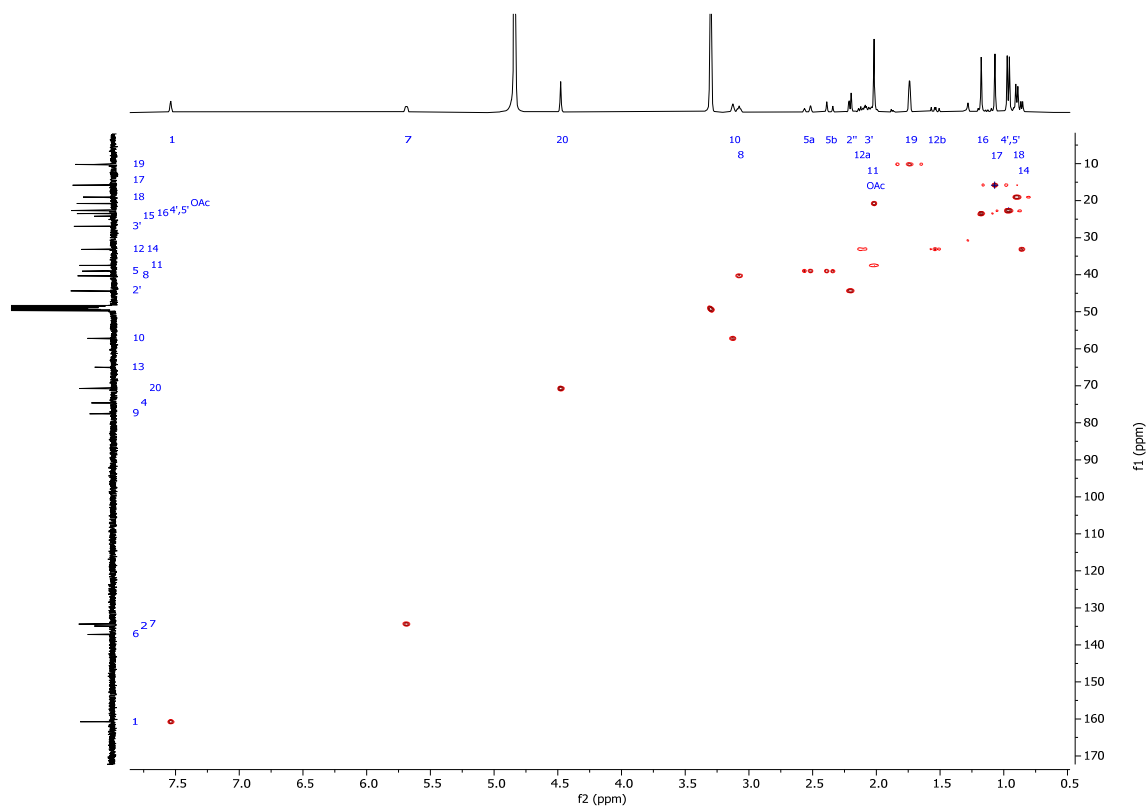

**Figure S13d.** HSQC spectrum of AcDPiPn (**13**) in CD<sub>3</sub>OD.

## Supplementary Material

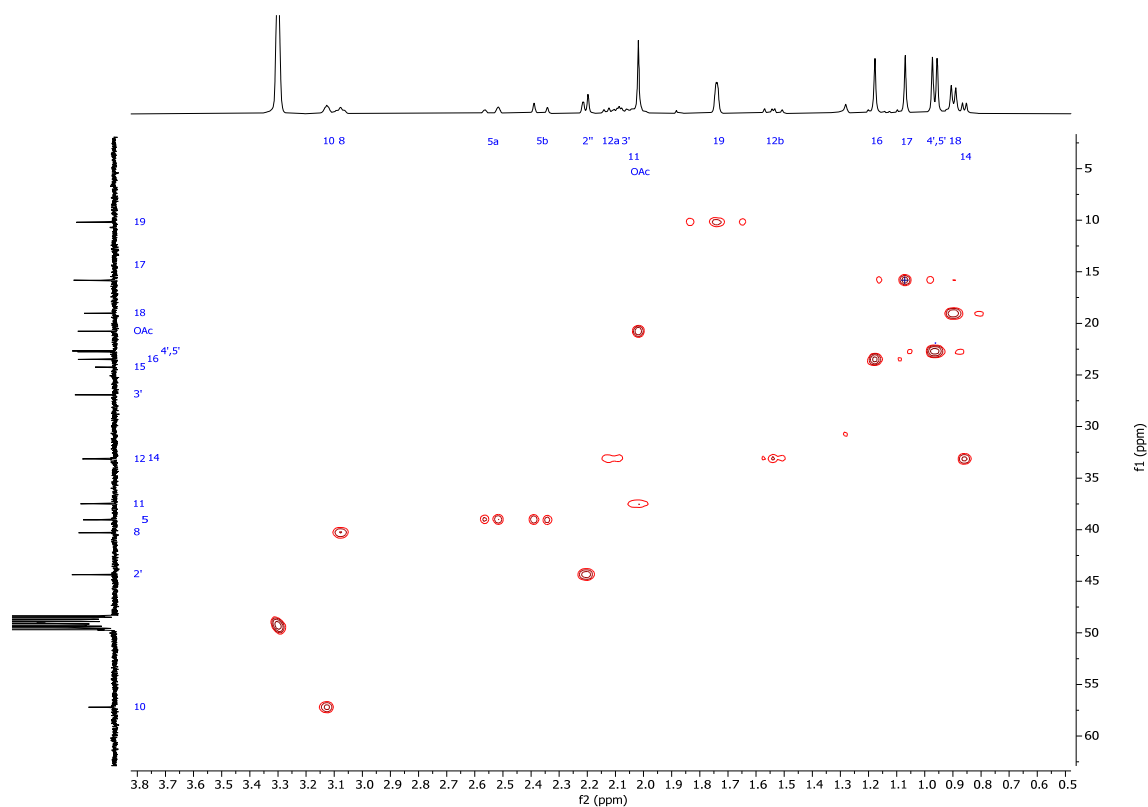

**Figure S13e.** Expansion ( $\delta_{\text{H}}$  3.8-0.2,  $\delta_{\text{C}}$  62-3) of HSQC spectrum of AcDPiPn (**13**) in CD<sub>3</sub>OD.

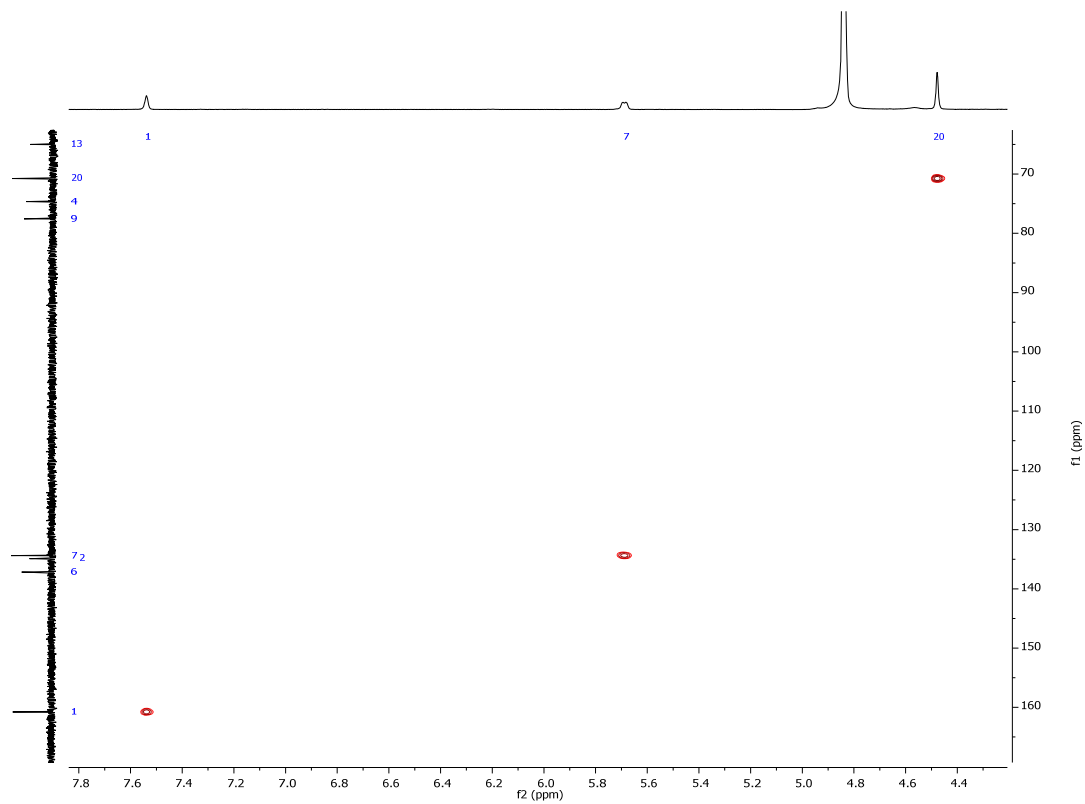

**Figure S13f.** Expansion ( $\delta_{\text{H}}$  7.8-4.2,  $\delta_{\text{C}}$  170-65) of HSQC spectrum of AcDPiPn (**13**) in CD<sub>3</sub>OD.

# Supplementary Material

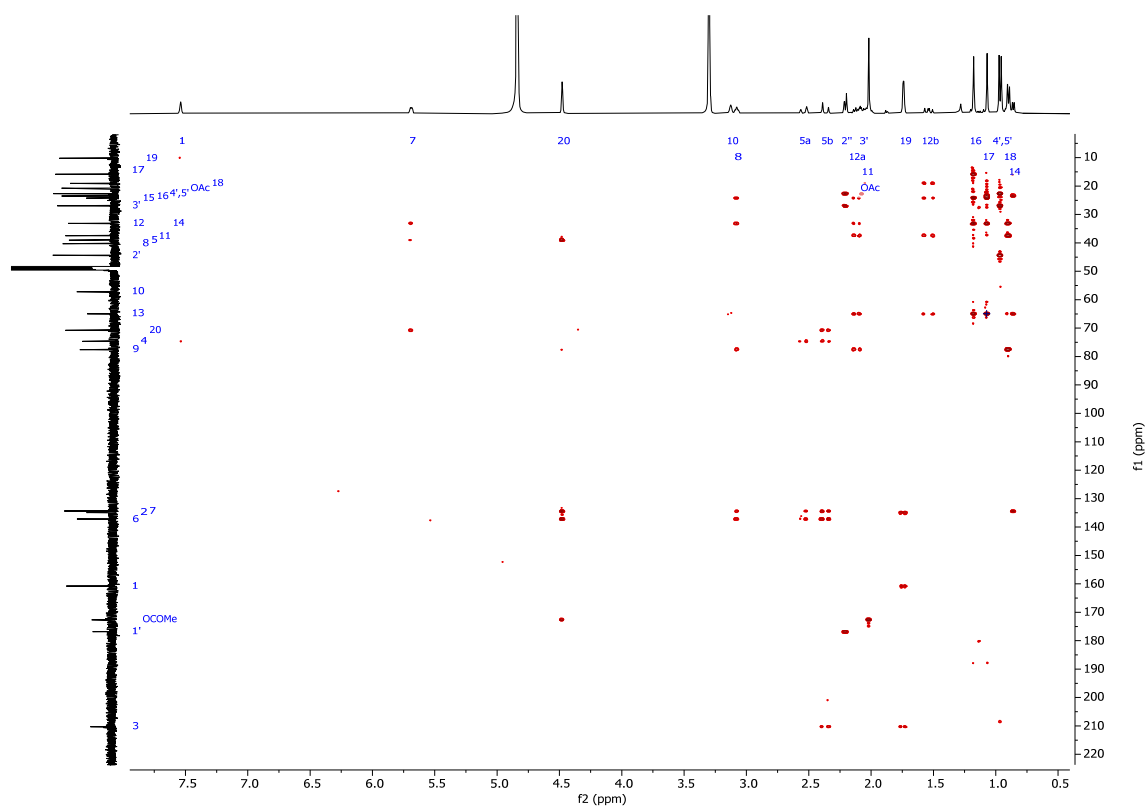

**Figure S13g.** HMBC spectrum of AcDPiPn (**13**) in CD<sub>3</sub>OD.

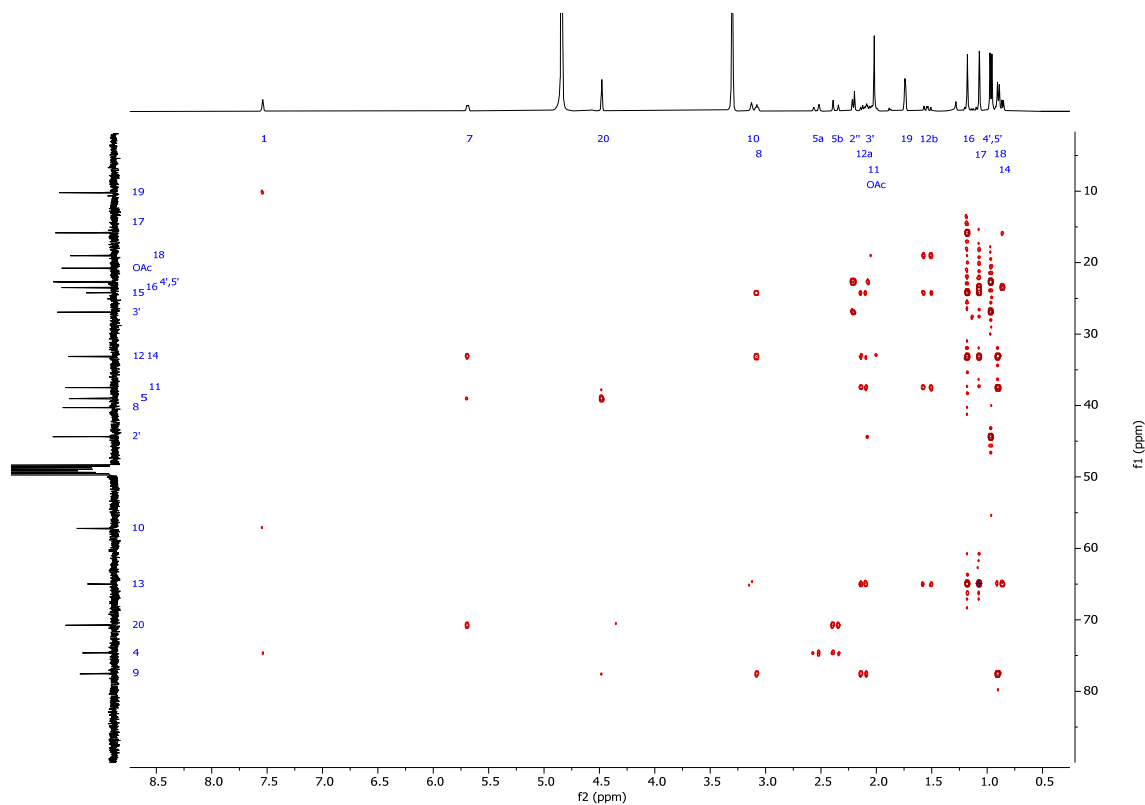

**Figure S13h.** Expansion ( $\delta_H$  8.7-0.2,  $\delta_C$  90-3) of HMBC spectrum of AcDPiPn (**13**) in CD<sub>3</sub>OD.



# Supplementary Material

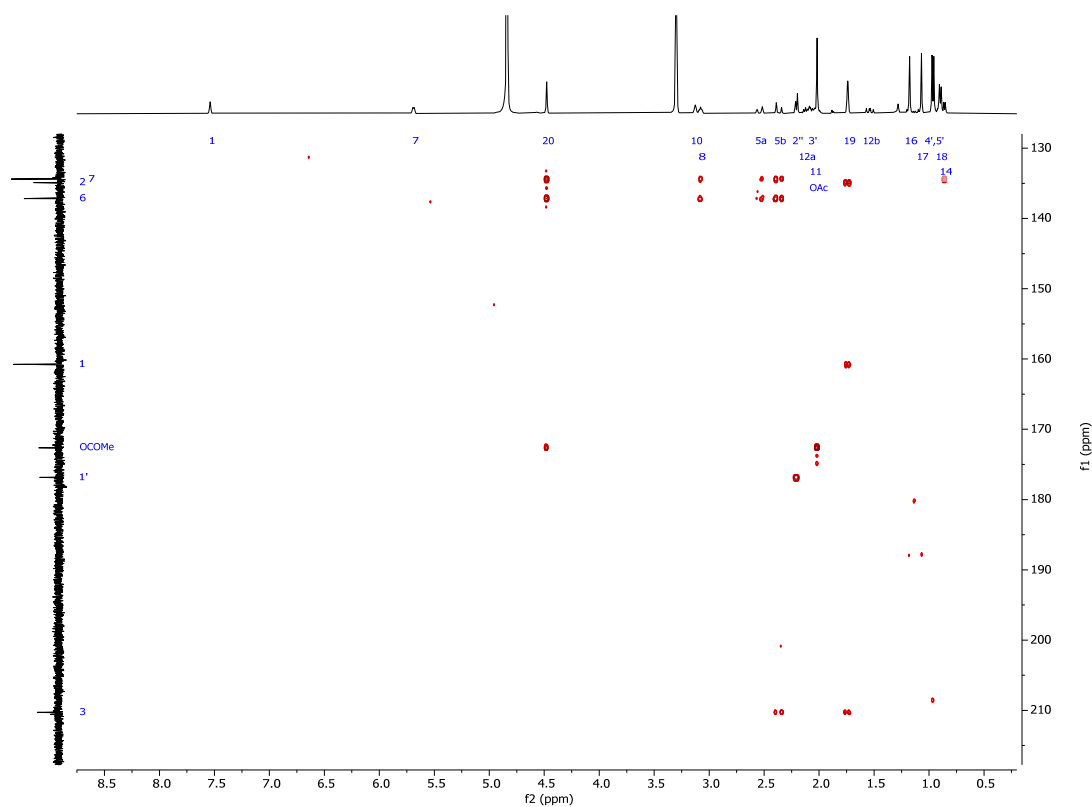

**Figure S13i.** Expansion ( $\delta_{\text{H}}$  8.7-0.2,  $\delta_{\text{C}}$  215-128) of HMBC spectrum of AcDPiPn (**13**) in  $\text{CD}_3\text{OD}$ .

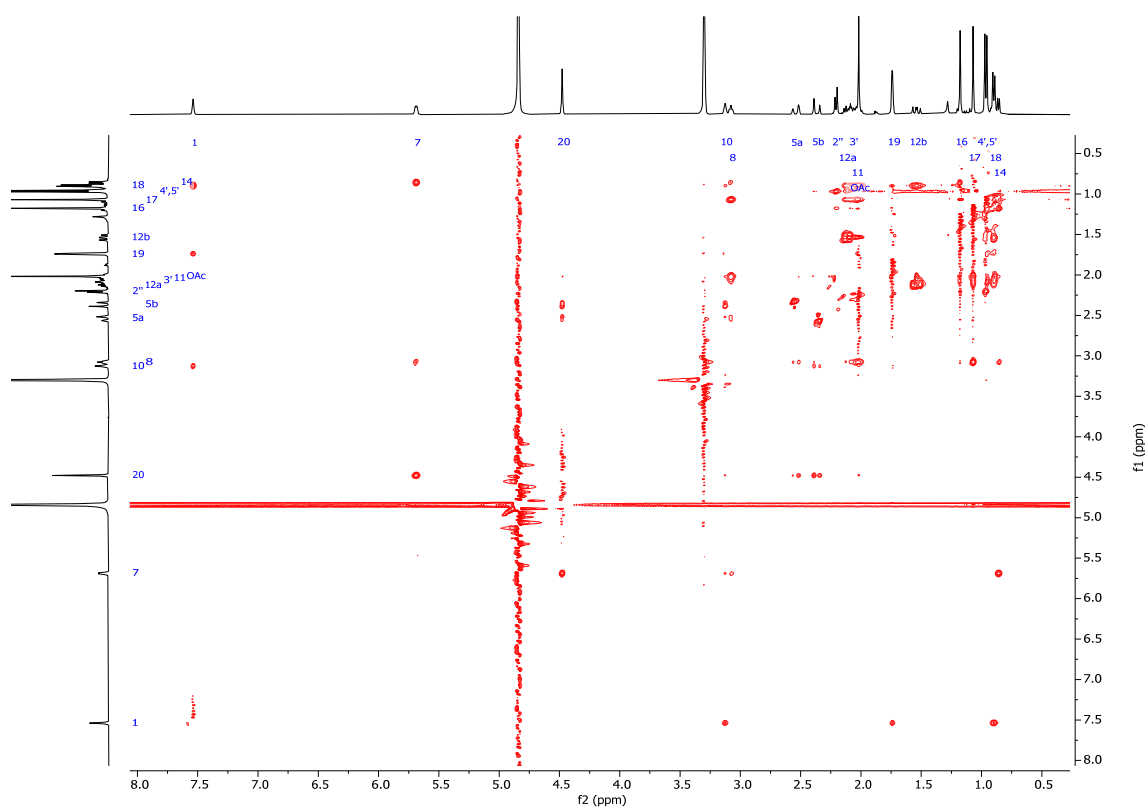

**Figure S13j.** NOESY2D spectrum of AcDPiPn (**13**) in  $\text{CD}_3\text{OD}$ .

# Supplementary Material

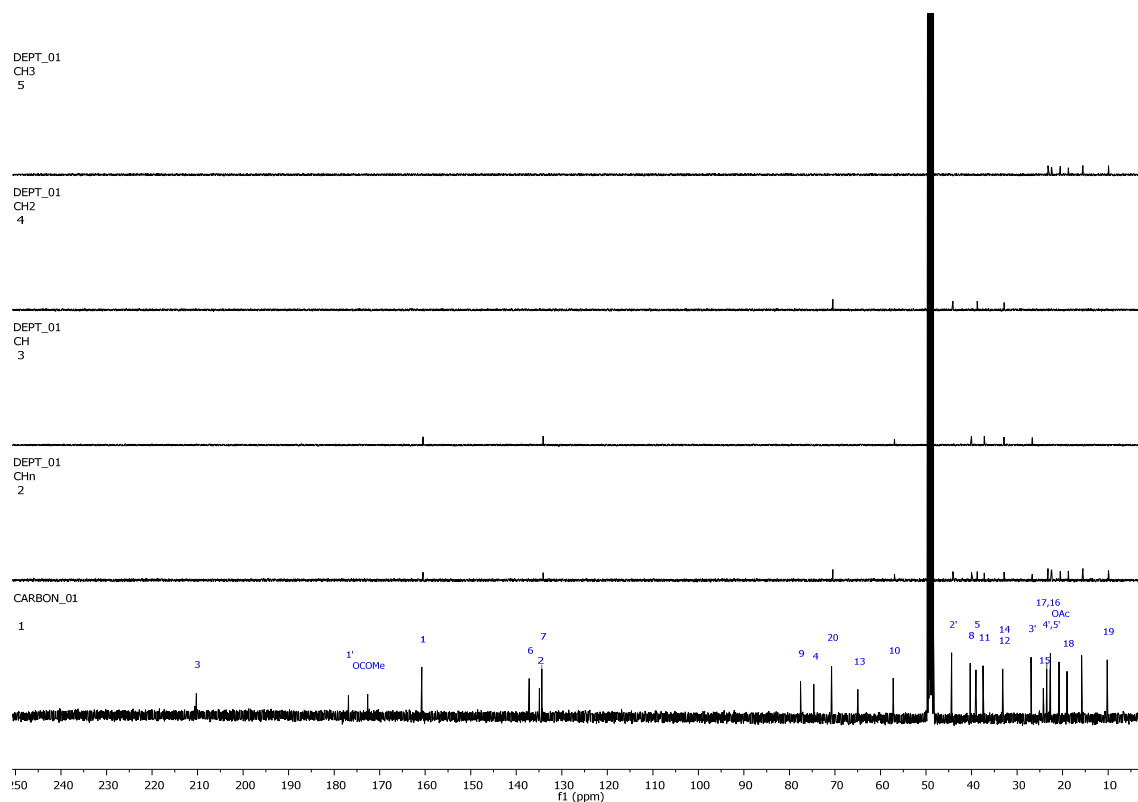

**Figure S13k.** DEPT spectrum of AcDPiPn (**13**) in CD<sub>3</sub>OD.

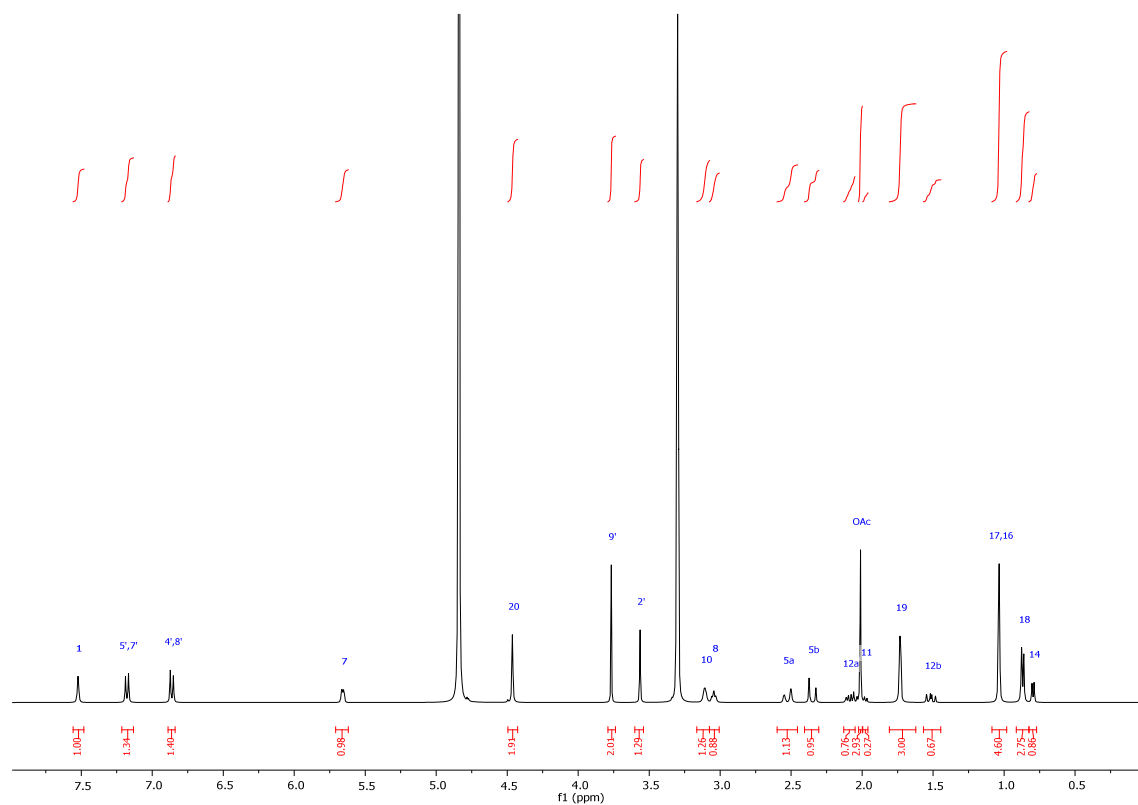

**Figure S14a.** <sup>1</sup>H-NMR spectrum of AcDPMcOP (**14**) in CD<sub>3</sub>OD (400 MHz).

## Supplementary Material

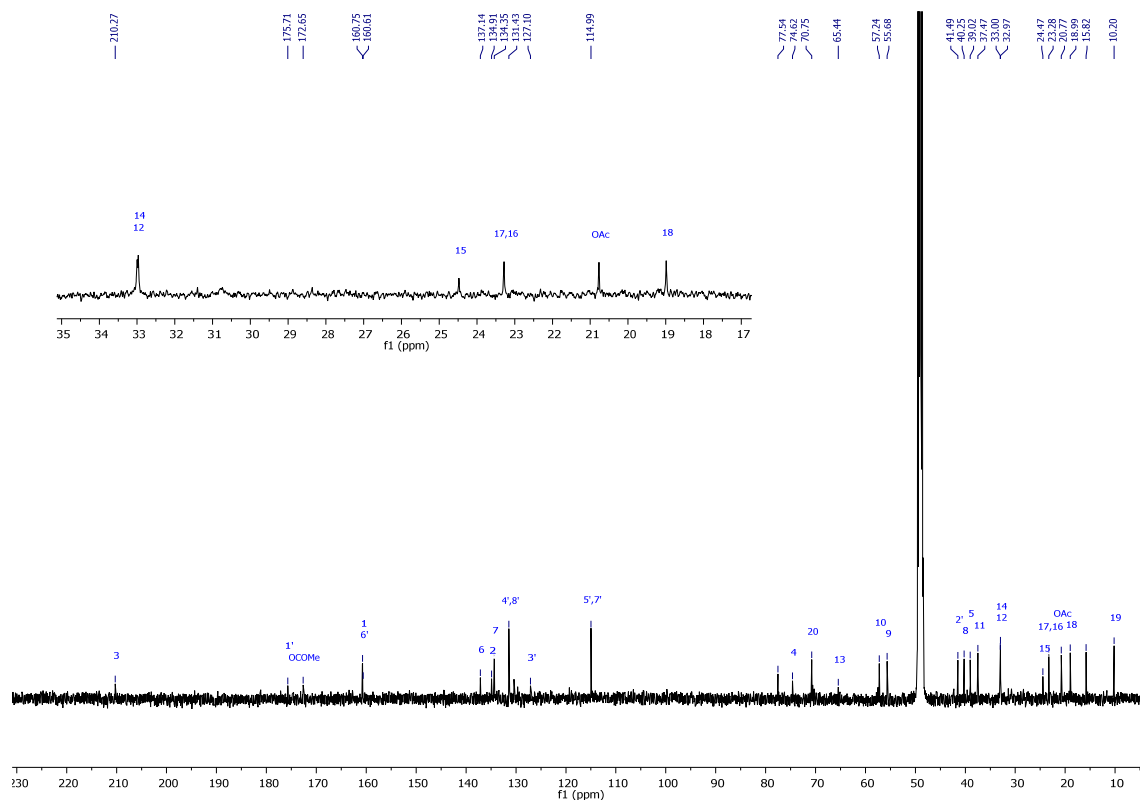

**Figure S14b.**  $^{13}\text{C}$ -NMR spectrum of AcDPMcOP (**14**) in  $\text{CD}_3\text{OD}$  (100 MHz).

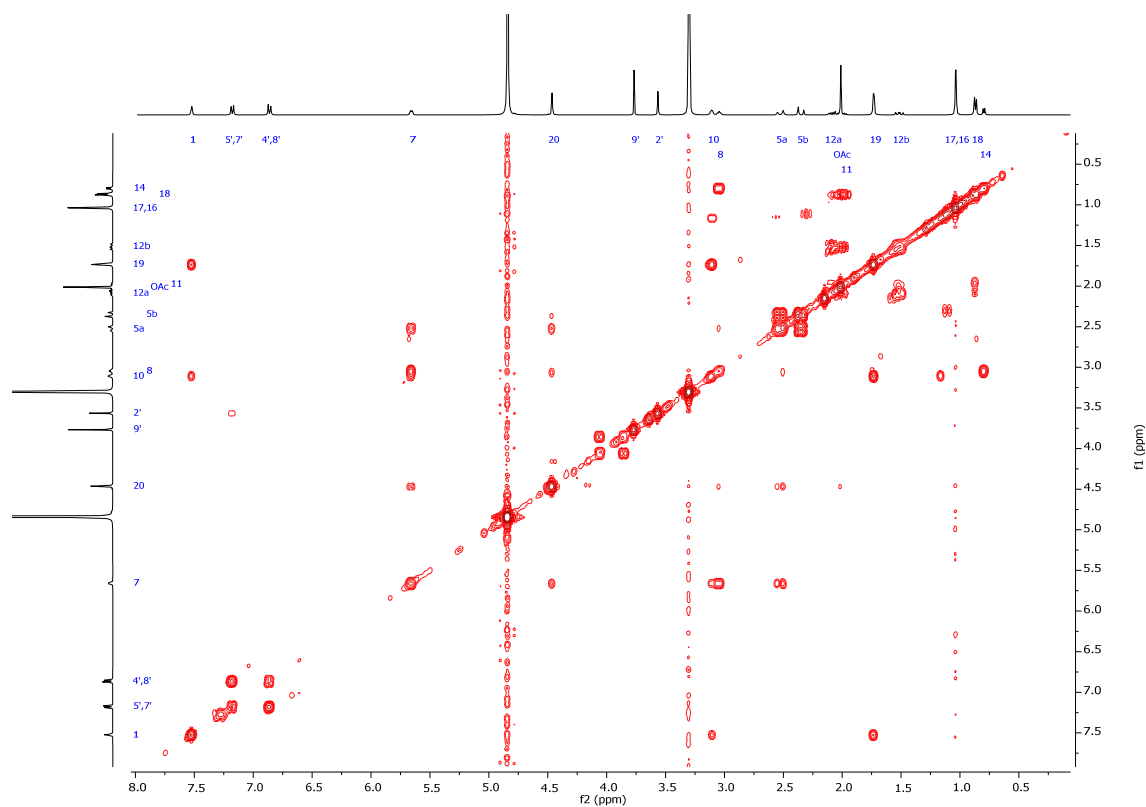

**Figure S14c.** COSY spectrum of AcDPMcOP (**14**) in  $\text{CD}_3\text{OD}$ .

# Supplementary Material

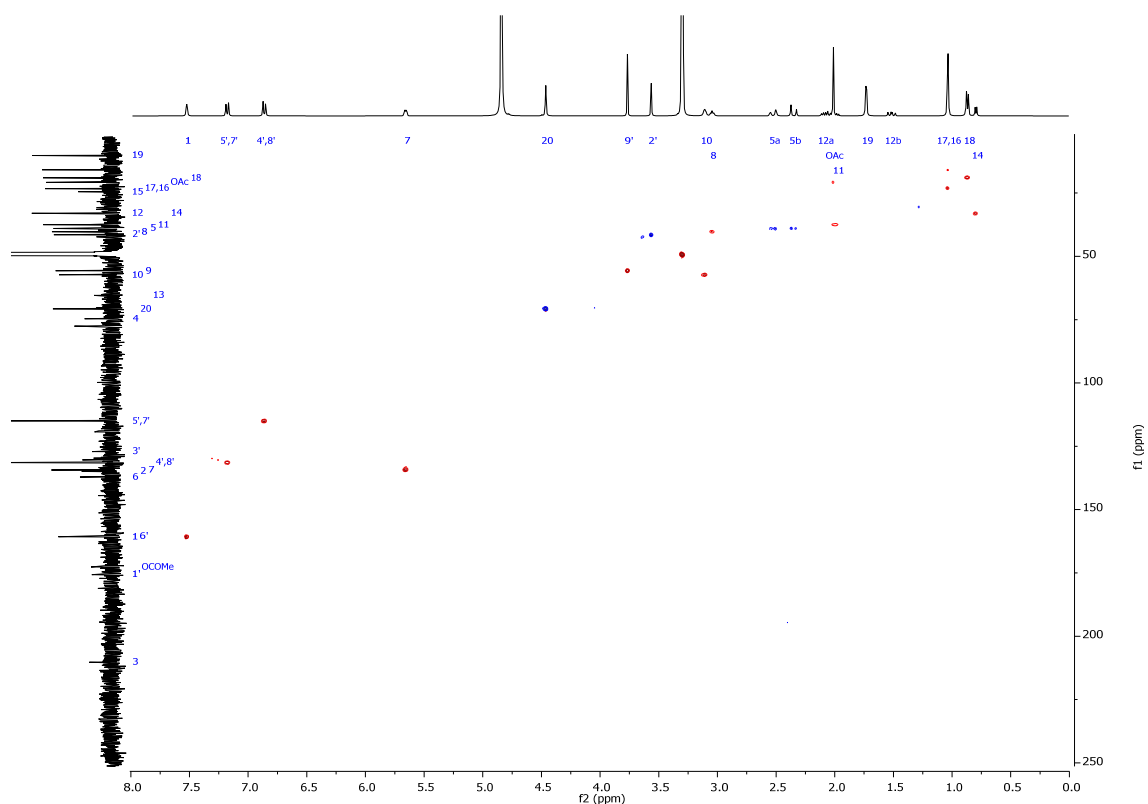

**Figure S14d.** HSQC spectrum of AcDPMcOP (**14**) in CD<sub>3</sub>OD.

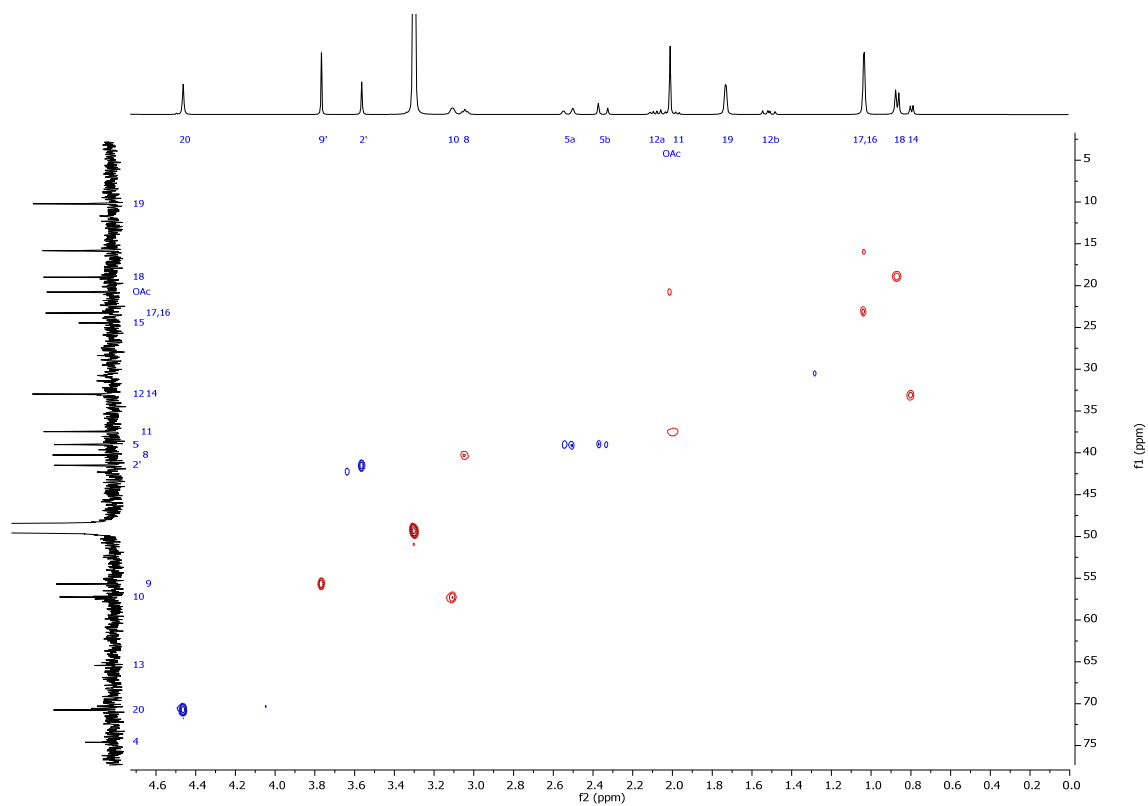

**Figure S14e.** Expansion ( $\delta_{\text{H}}$  4.7-0.1,  $\delta_{\text{C}}$  77-2) of HSQC spectrum of AcDPMcOP (**14**) in CD<sub>3</sub>OD.

# Supplementary Material

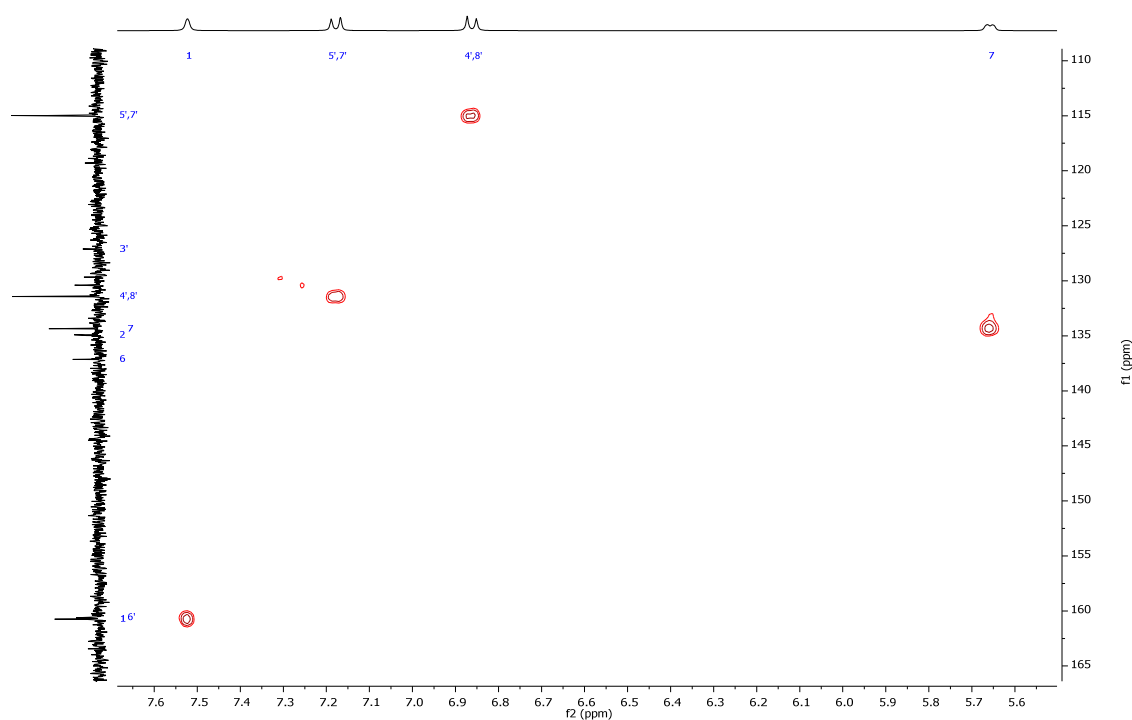

**Figure S14f.** Expansion ( $\delta_{\text{H}}$  7.7-5.5,  $\delta_{\text{C}}$  165-110) of HSQC spectrum of AcDPMcOP (**14**) in CD<sub>3</sub>OD.

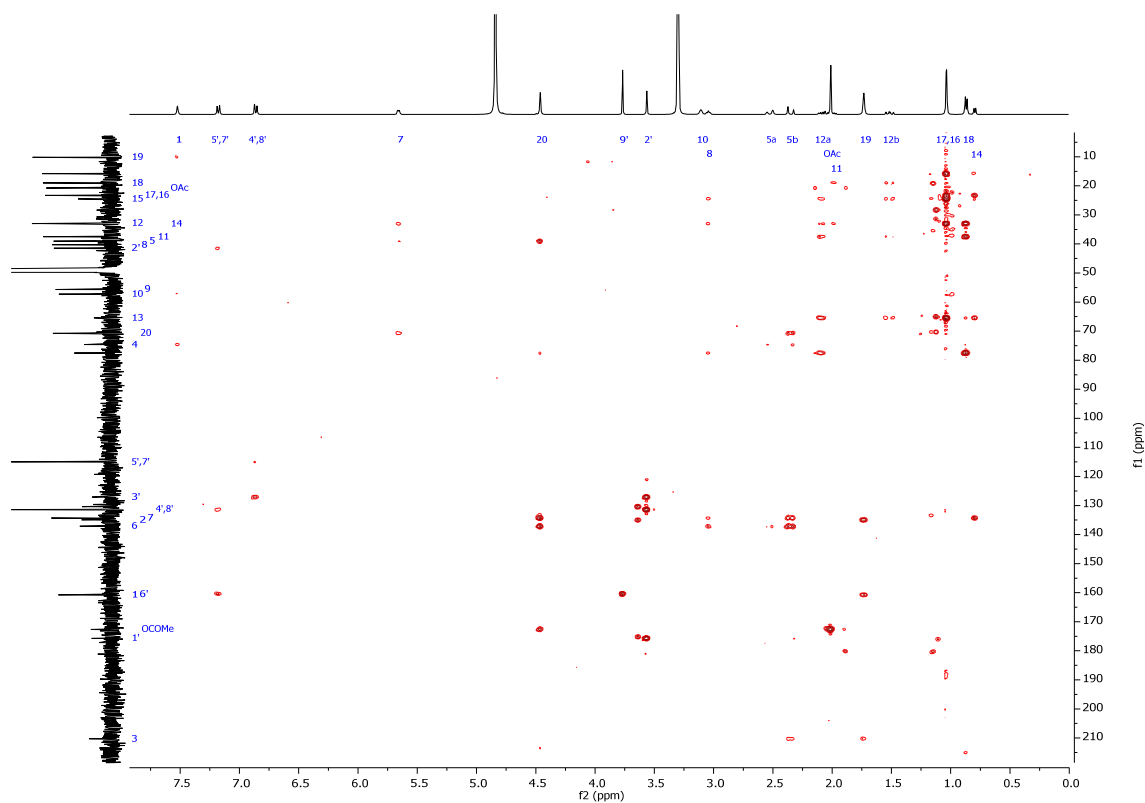

**Figure S14g.** HMBC spectrum of AcDPMcOP (**14**) in CD<sub>3</sub>OD.

# Supplementary Material

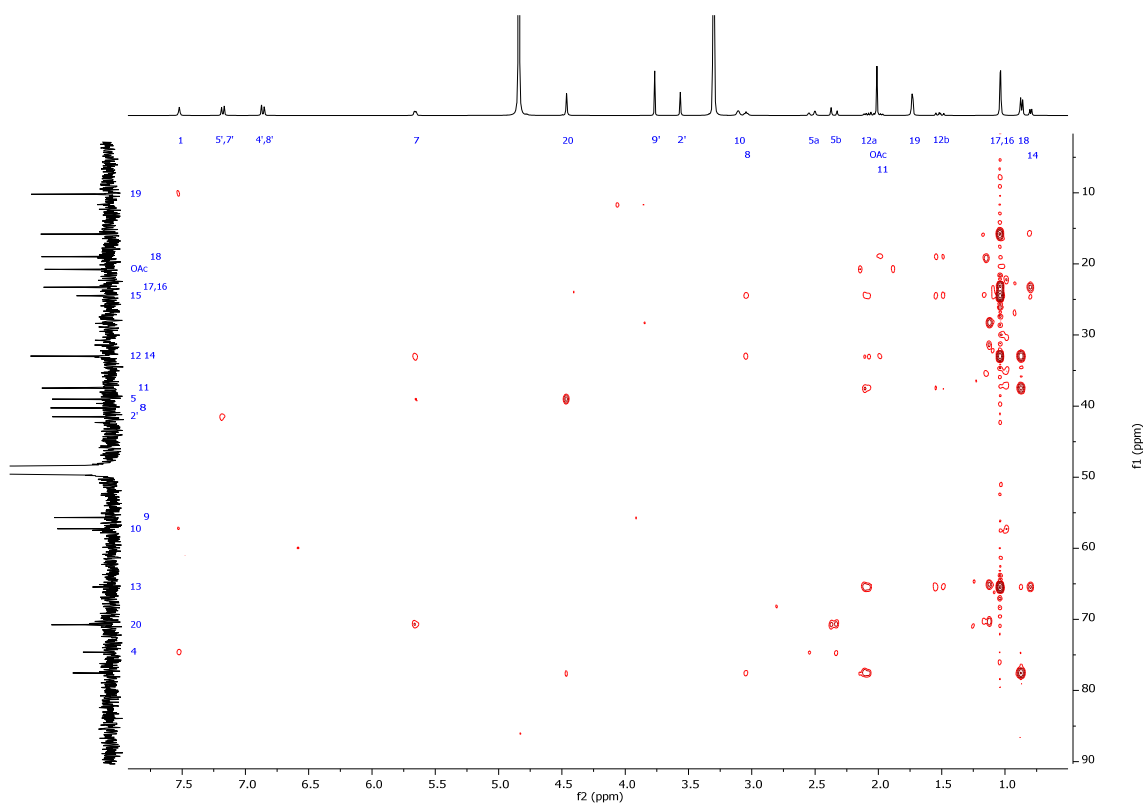

**Figure S14h.** Expansion ( $\delta_{\text{H}}$  7.7-0.5,  $\delta_{\text{C}}$  90-3) of HMBC spectrum of AcDPMcOP (**14**) in CD<sub>3</sub>OD.

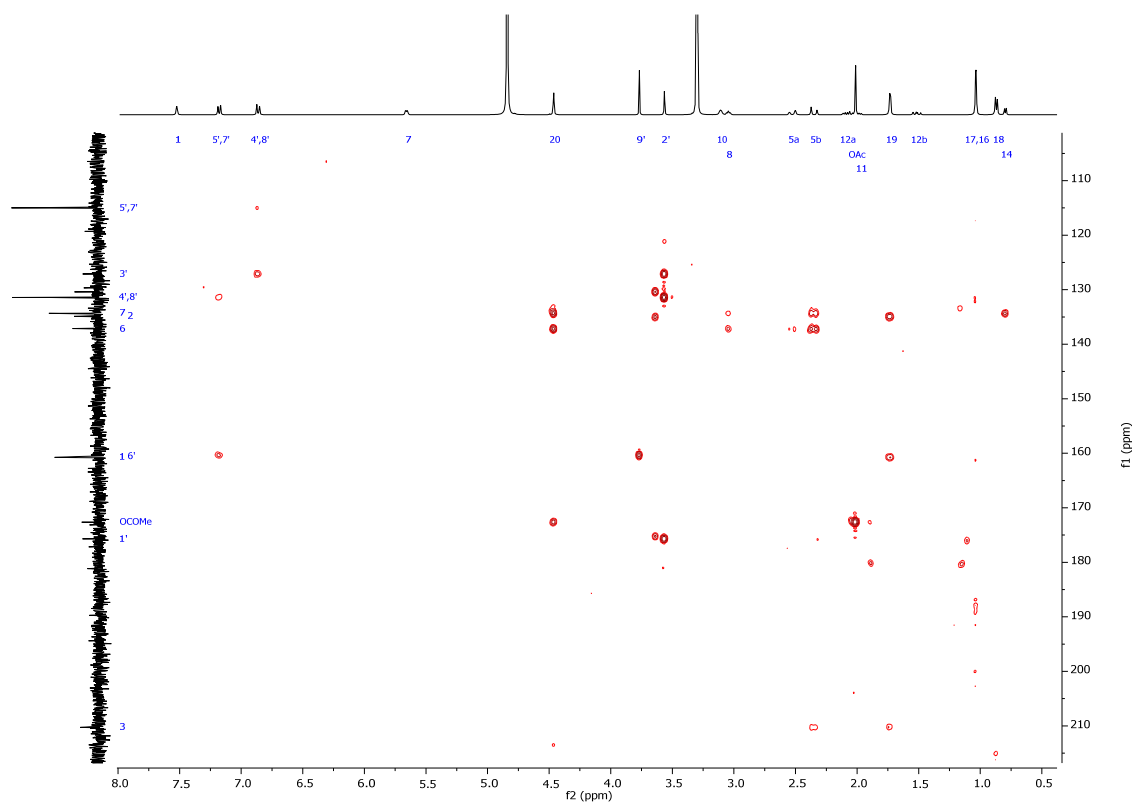

**Figure S14i.** Expansion ( $\delta_{\text{H}}$  8.0-0.5,  $\delta_{\text{C}}$  215-105) of HMBC spectrum of AcDPMcOP (**14**) in CD<sub>3</sub>OD.

Supplementary Material

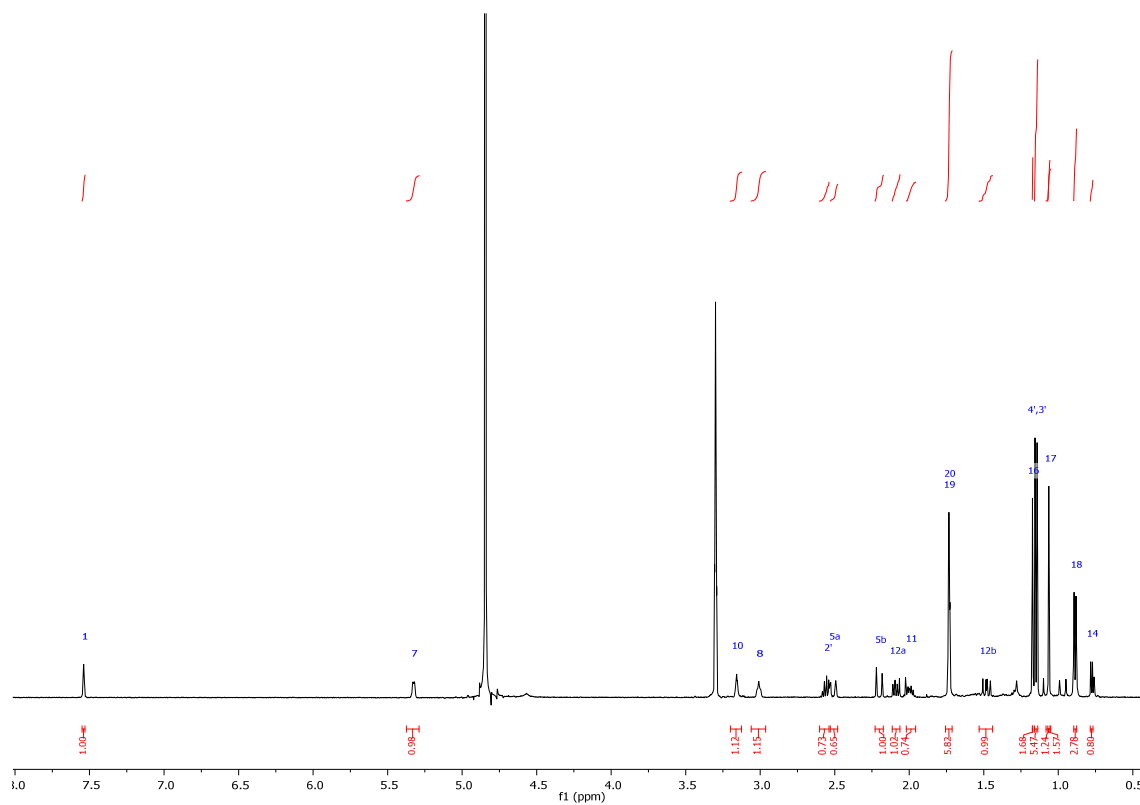

**Figure S15a.**  $^1\text{H}$ -NMR spectrum of diDPB (**15**) in  $\text{CD}_3\text{OD}$  (500 MHz).

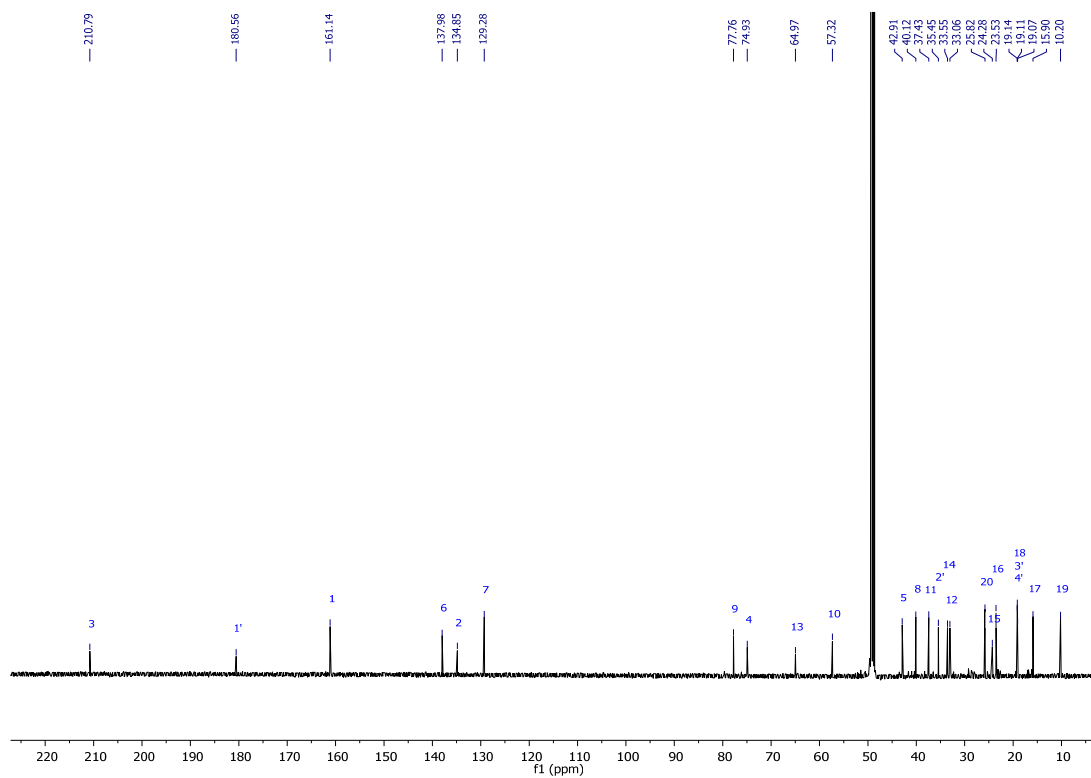

**Figure S15b.**  $^{13}\text{C}$ -NMR spectrum of diDPB (**15**) in  $\text{CD}_3\text{OD}$  (125 MHz)

# Supplementary Material

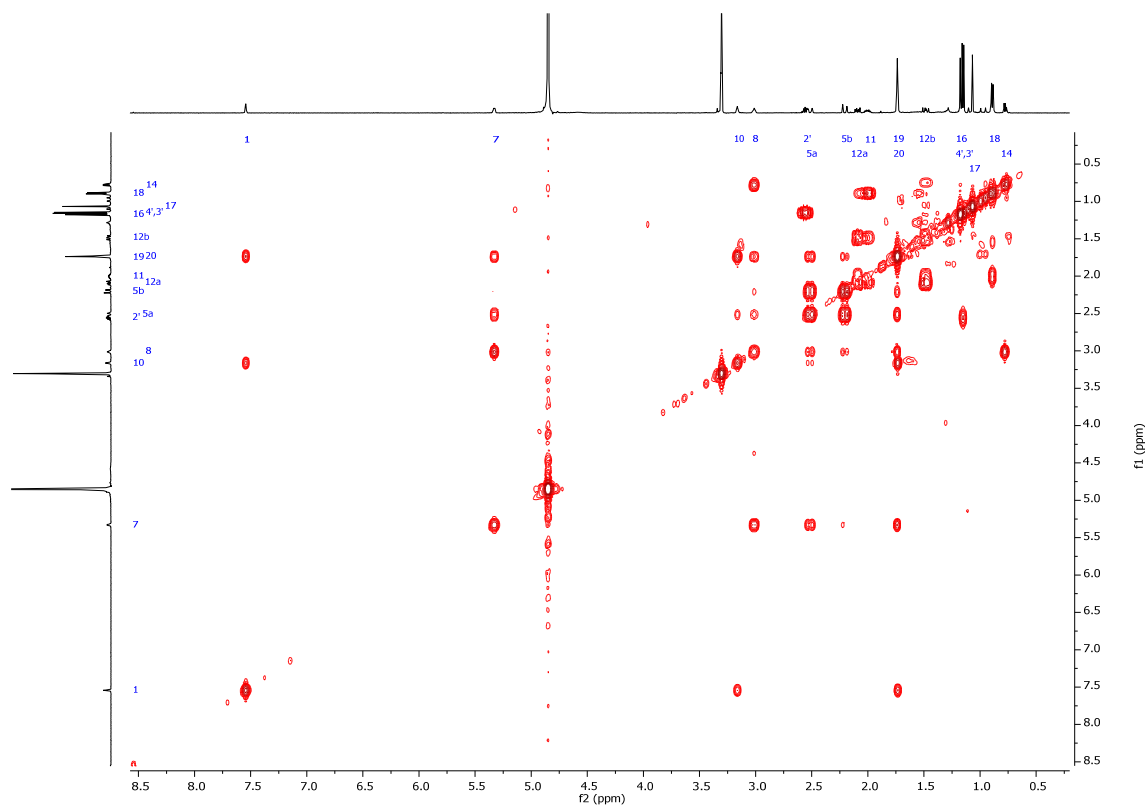

**Figure S15c.** COSY spectrum of diDPB (**15**) in CD<sub>3</sub>OD.

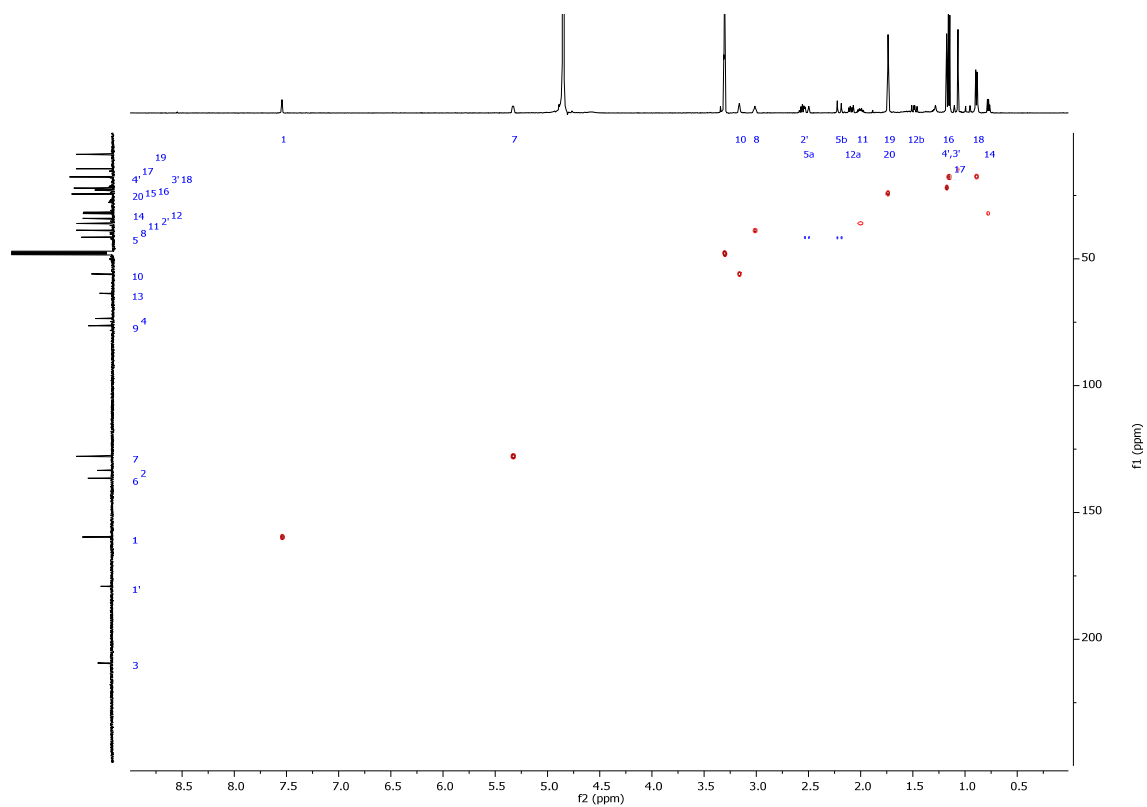

**Figure S15d.** HSQC spectrum of diDPB (**15**) in CD<sub>3</sub>OD.



# Supplementary Material

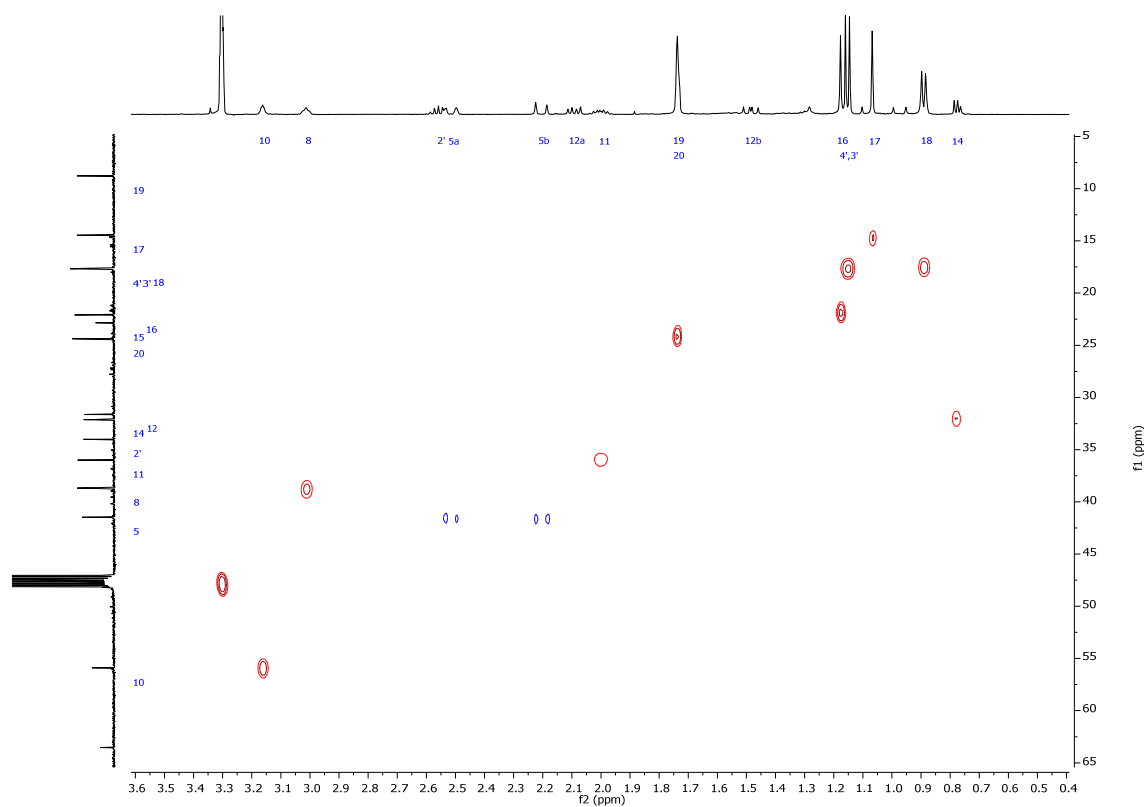

**Figure S15e.** Expansion ( $\delta_{\text{H}}$  3.6-0.4,  $\delta_{\text{C}}$  65-5) of HSQC spectrum of diDPB (**15**) in  $\text{CD}_3\text{OD}$ .

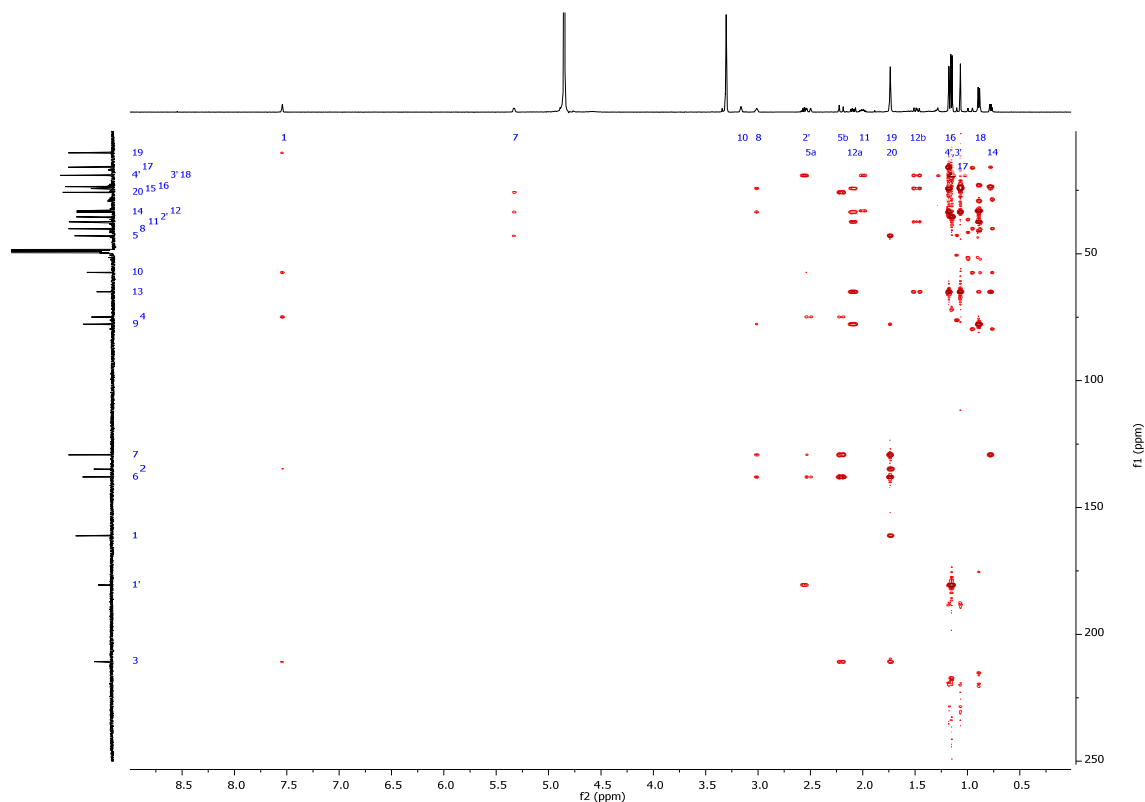

**Figure S15f.** HMBC spectrum of diDPB (**15**) in  $\text{CD}_3\text{OD}$ .

# Supplementary Material

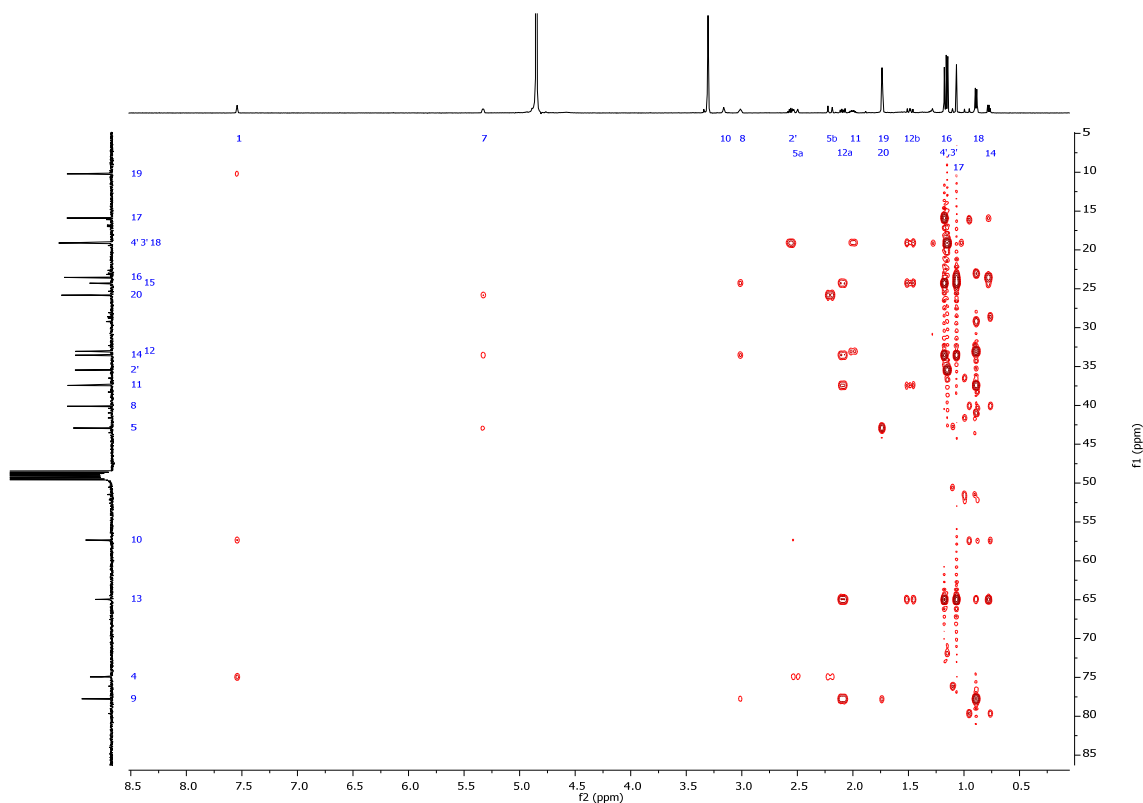

**Figure S15g.** Expansion ( $\delta_{\text{H}}$  8.5-0.3,  $\delta_{\text{C}}$  85-5) of HMBC spectrum of diDPB (**15**) in  $\text{CD}_3\text{OD}$ .

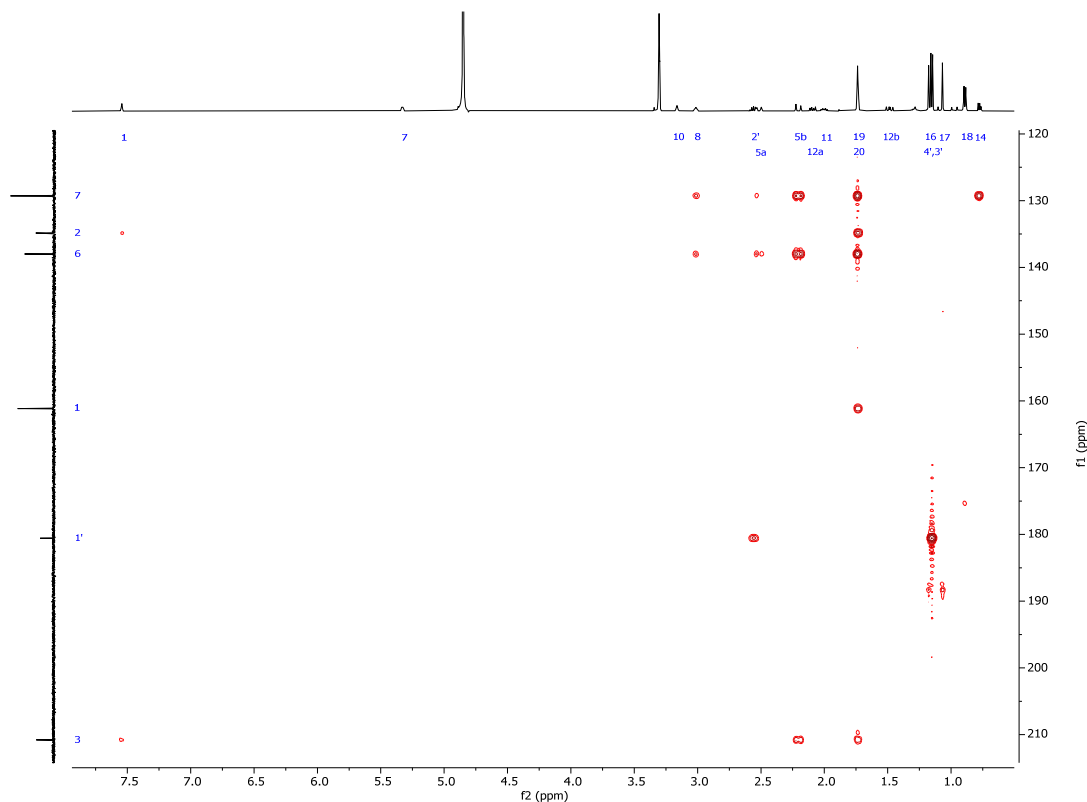

**Figure S15h.** Expansion ( $\delta_{\text{H}}$  8.0-0.3,  $\delta_{\text{C}}$  210-120) of HMBC spectrum of diDPB (**15**) in  $\text{CD}_3\text{OD}$ .

## Supplementary Material

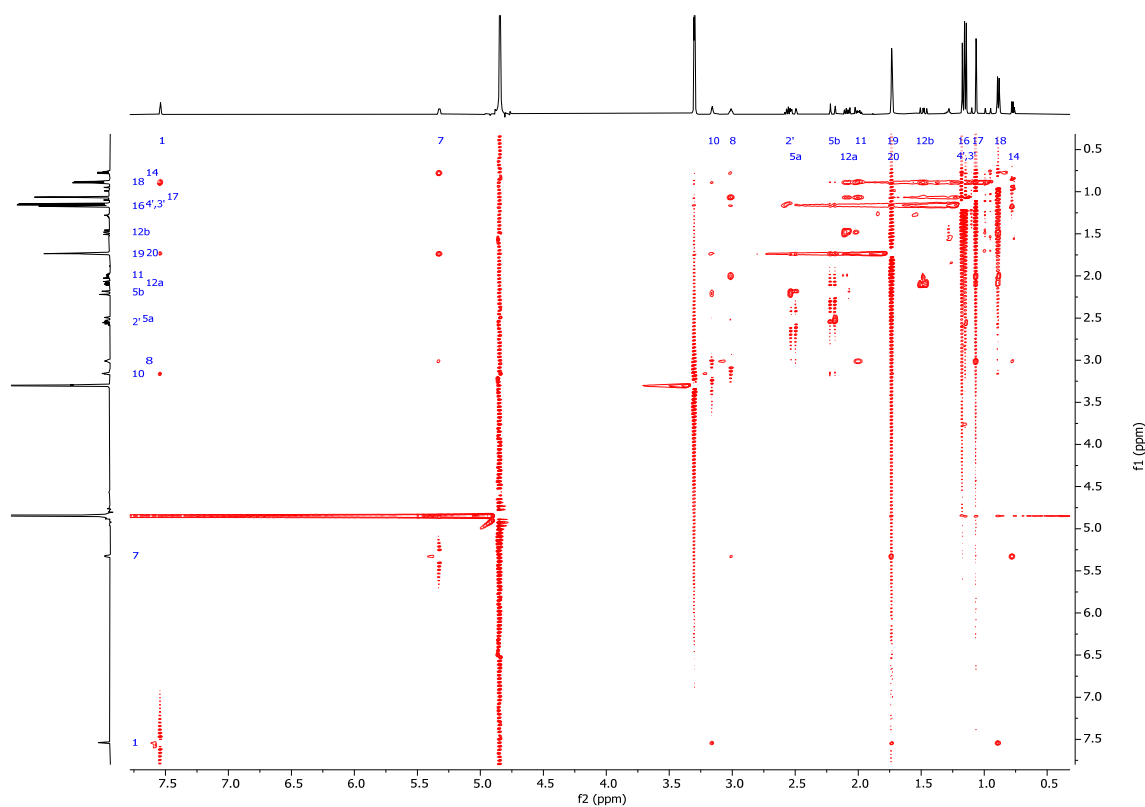

**Figure S15i.** NOESY2D spectrum of diDPB (**15**) in CD<sub>3</sub>OD.

DEPT\_01  
CH3  
AB-01Y03-17-LA-Fr-1-2-3-hplc6-2-24

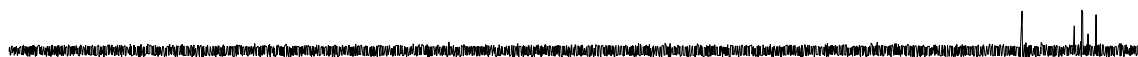

DEPT\_01  
CH2  
AB-01Y03-17-LA-Fr-1-2-3-hplc6-2-23

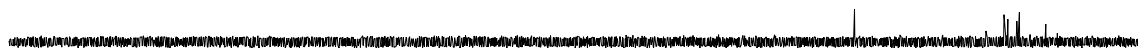

DEPT\_01  
CH  
AB-01Y03-17-LA-Fr-1-2-3-hplc6-2-22

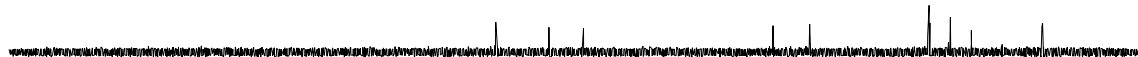

DEPT\_01  
CHn  
AB-01Y03-17-LA-Fr-1-2-3-hplc6-2-21

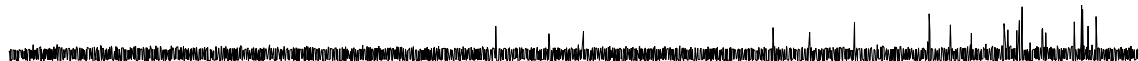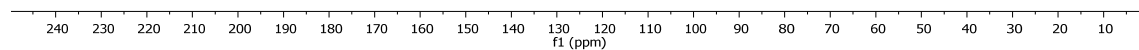

**Figure S15j.** DEPT spectrum of diDPB (**15**) in CD<sub>3</sub>OD.

*Supplementary Material*

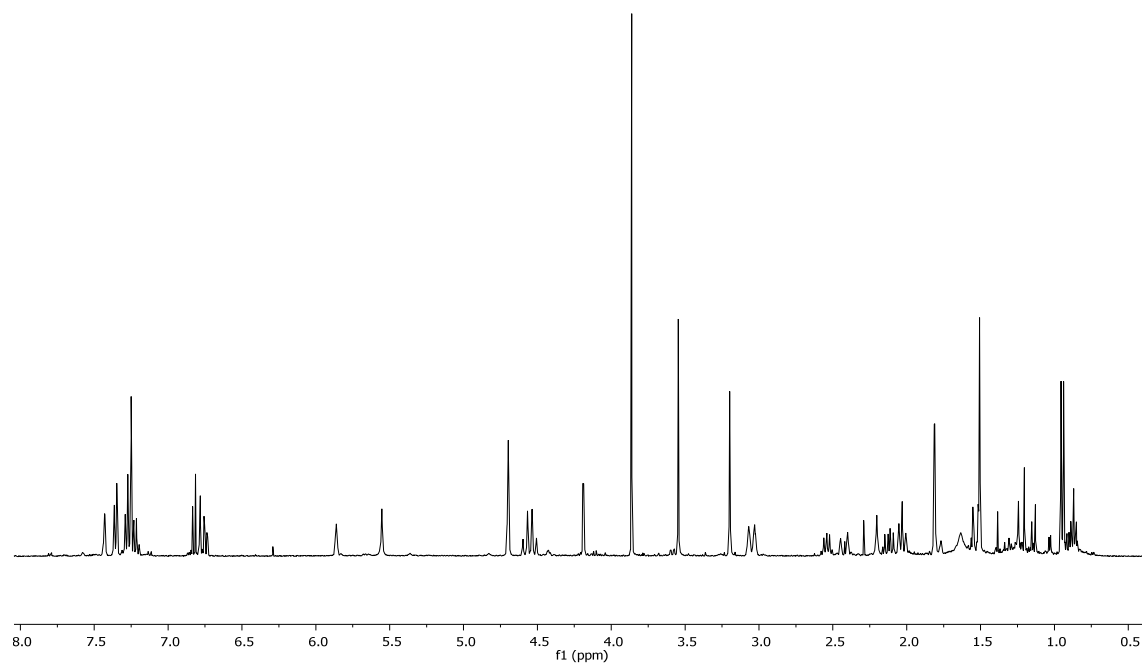

**Figure S16a.** <sup>1</sup>H NMR spectrum of RTX (**16**) in CDCl<sub>3</sub> (400 MHz).

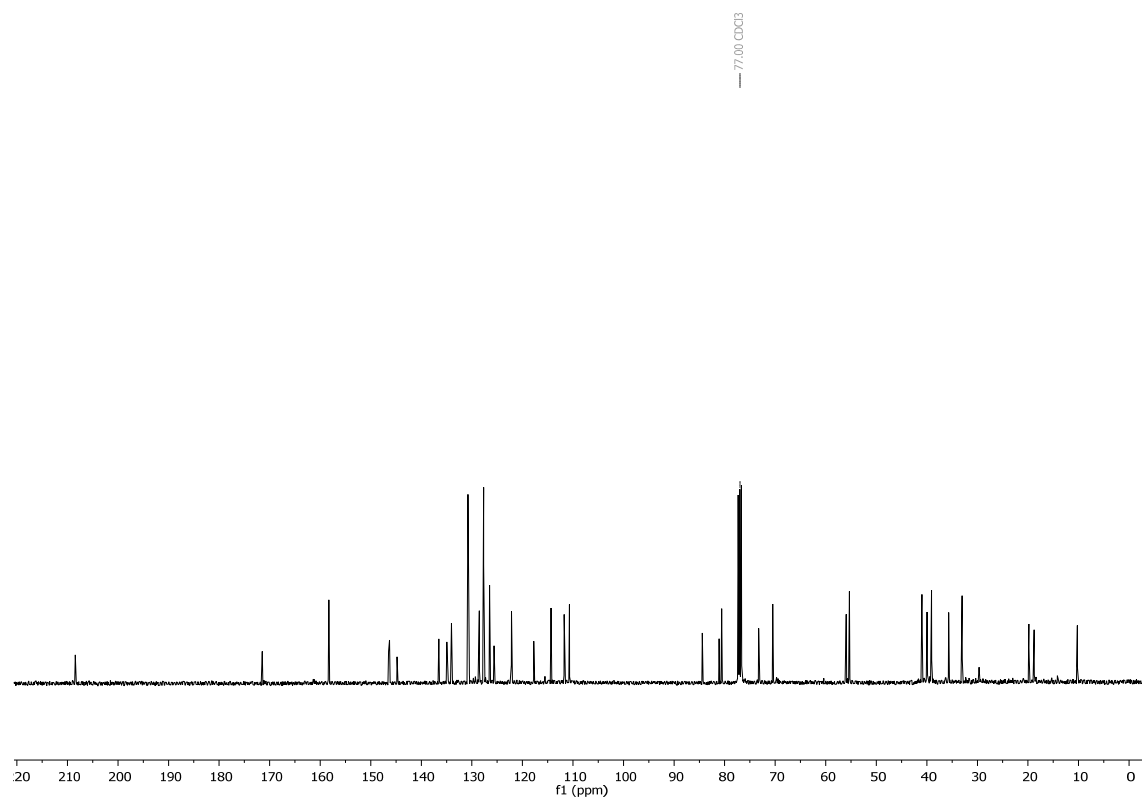

**Figure S16b.** <sup>13</sup>C NMR spectrum of RTX (**16**) in CDCl<sub>3</sub> (100 MHz).

# Supplementary Material

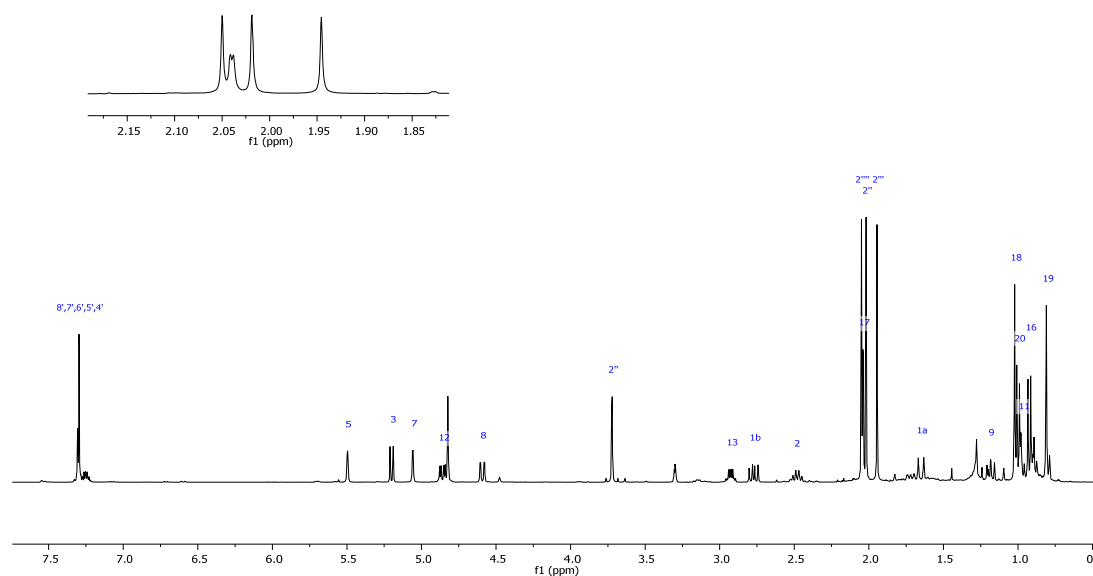

**Figure S17a.**  $^1\text{H}$ -NMR spectrum of EOF1 (**17**) in  $\text{CD}_3\text{OD}$  (400 MHz).

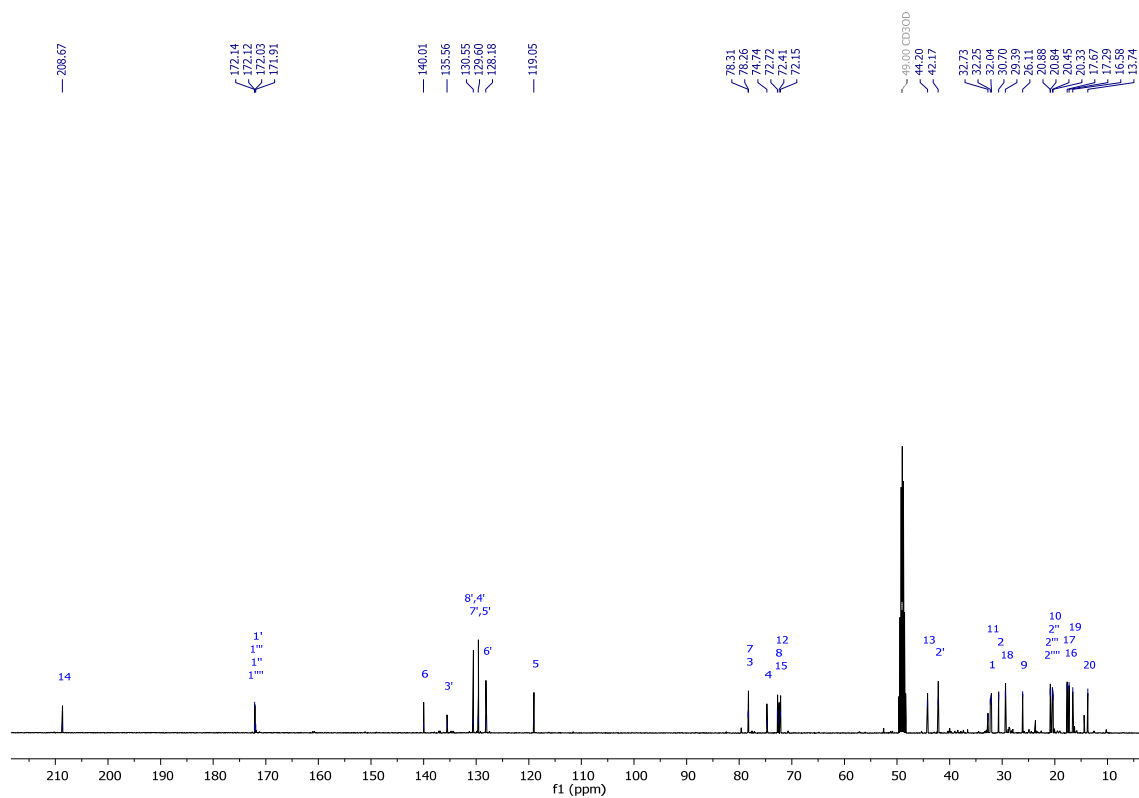

**Figure S17b.**  $^{13}\text{C}$ -NMR spectrum of EOF1 (**17**) in  $\text{CD}_3\text{OD}$ . (100 MHz).

Supplementary Material

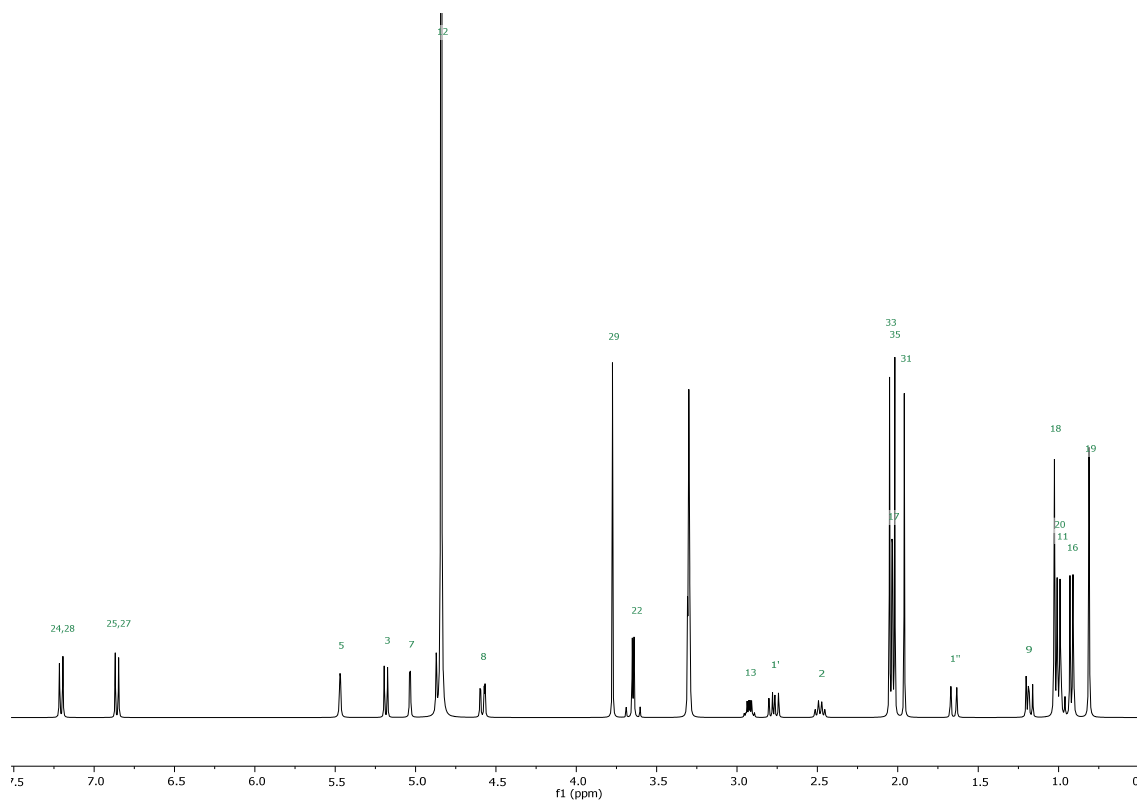

Figure S18a. <sup>1</sup>H-NMR spectrum of EOF2 (**18**) in CD<sub>3</sub>OD (400 MHz).

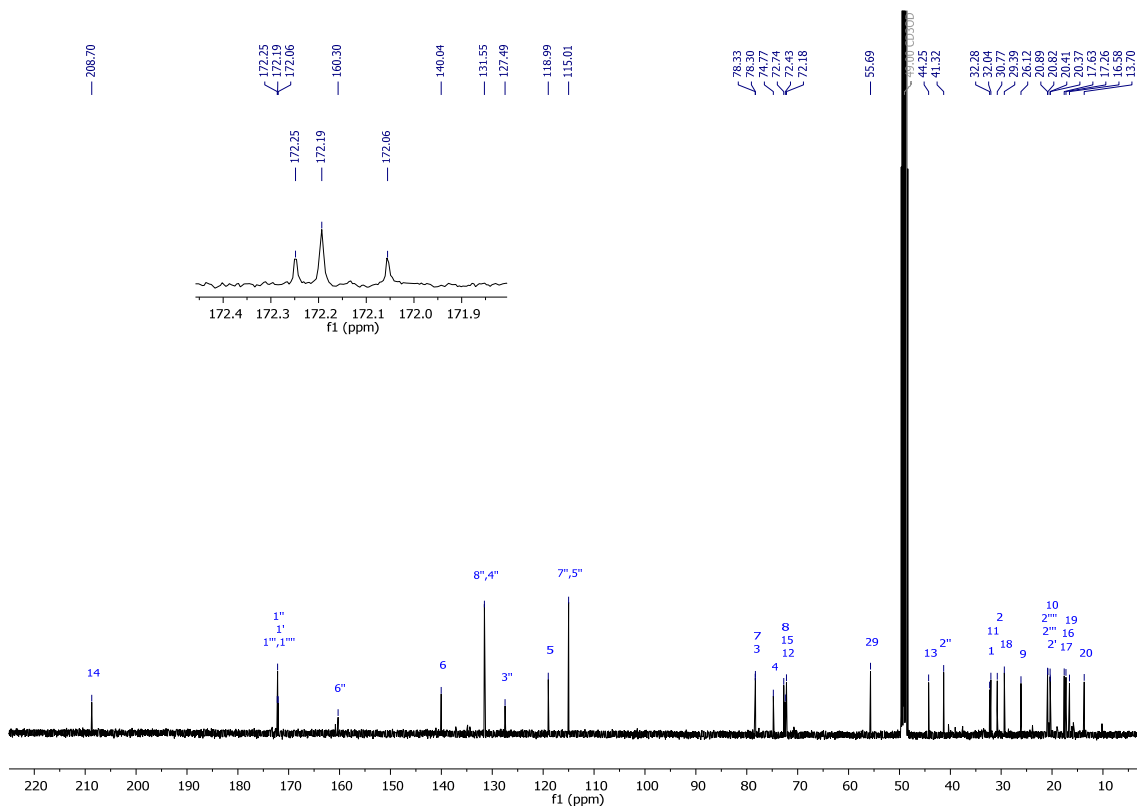

Figure S18b. <sup>13</sup>C-NMR spectrum of EOF2 (**18**) in CD<sub>3</sub>OD (100 MHz).

**2- ECD data**

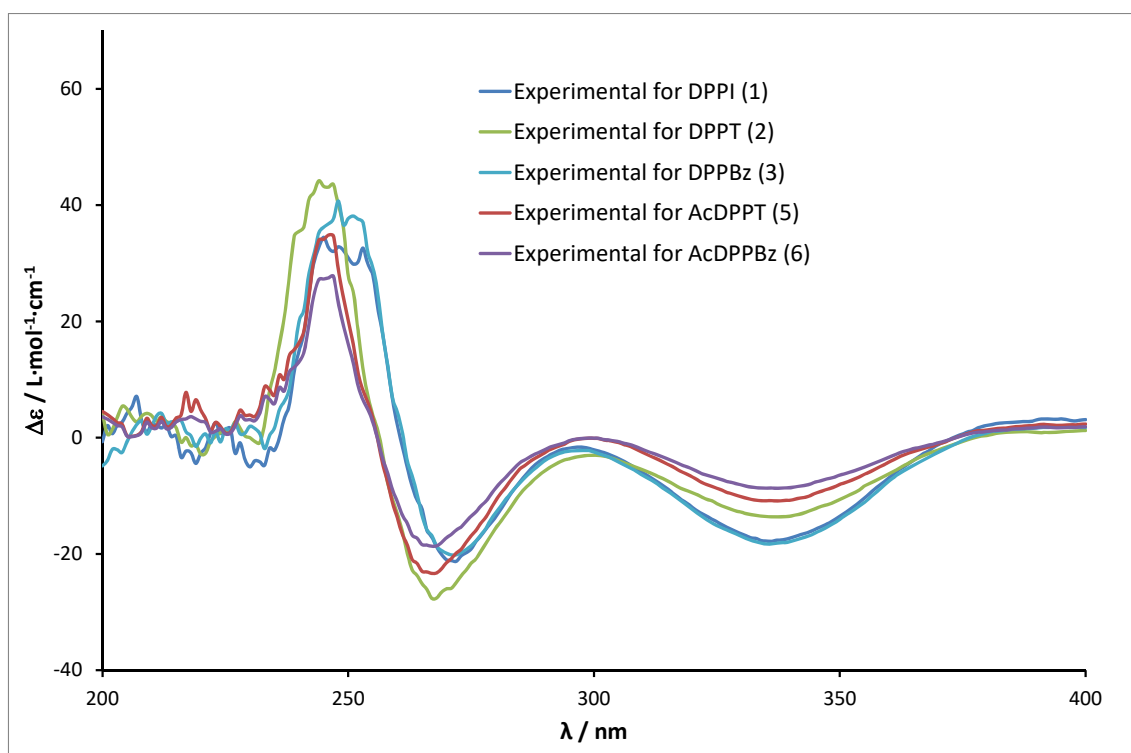

**Figure S19.** Experimental ECD spectra of DPPI (1), DPPT (2), DPPBz (3), AcDPPT (5) and AcDPPBz (6).

### 3- UHPLC-HRMS<sup>E</sup> data. Figures.

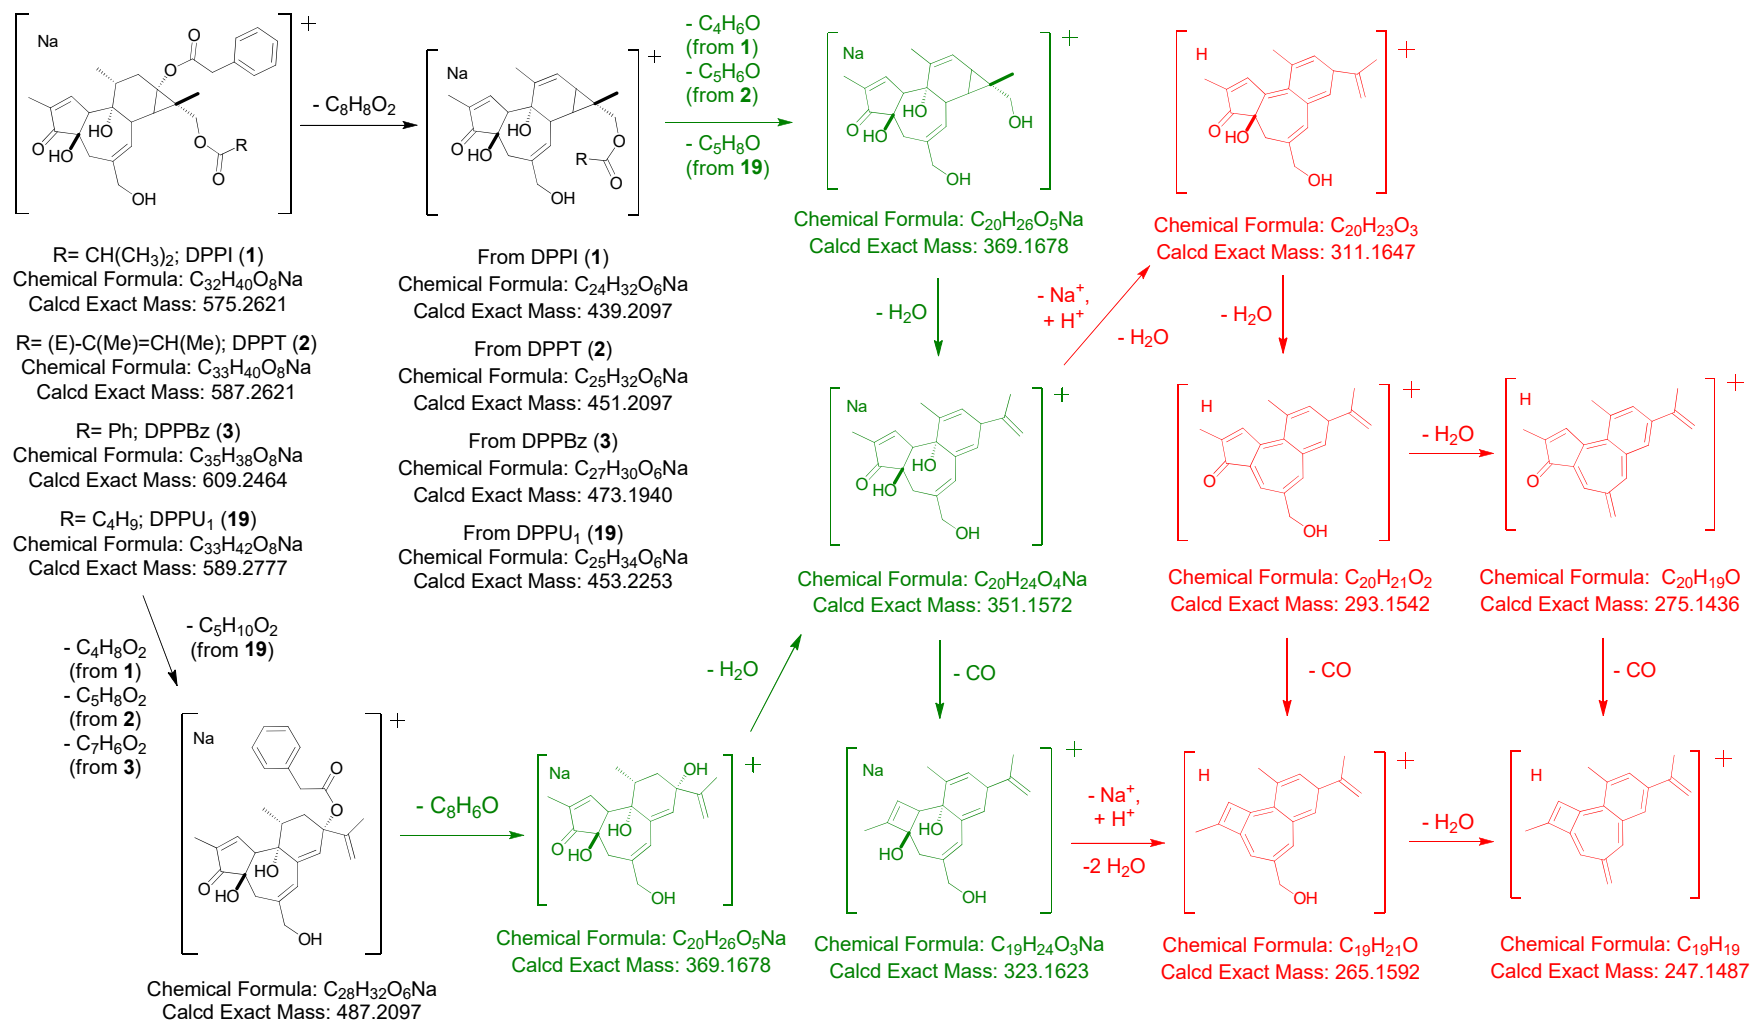

**Figure S20.** Proposed fragmentation route for selected ions on HRMS<sup>E</sup> spectrum (Data Independent Acquisition (DIA)) [1], in ESI positive mode, for DPPI (**1**), DPPT (**2**), DPPBz (**3**) and DPPU<sub>1</sub> (**19**). In red, common daughter ions with group B compounds (see section 2.2 and Figure S22).



# Supplementary Material

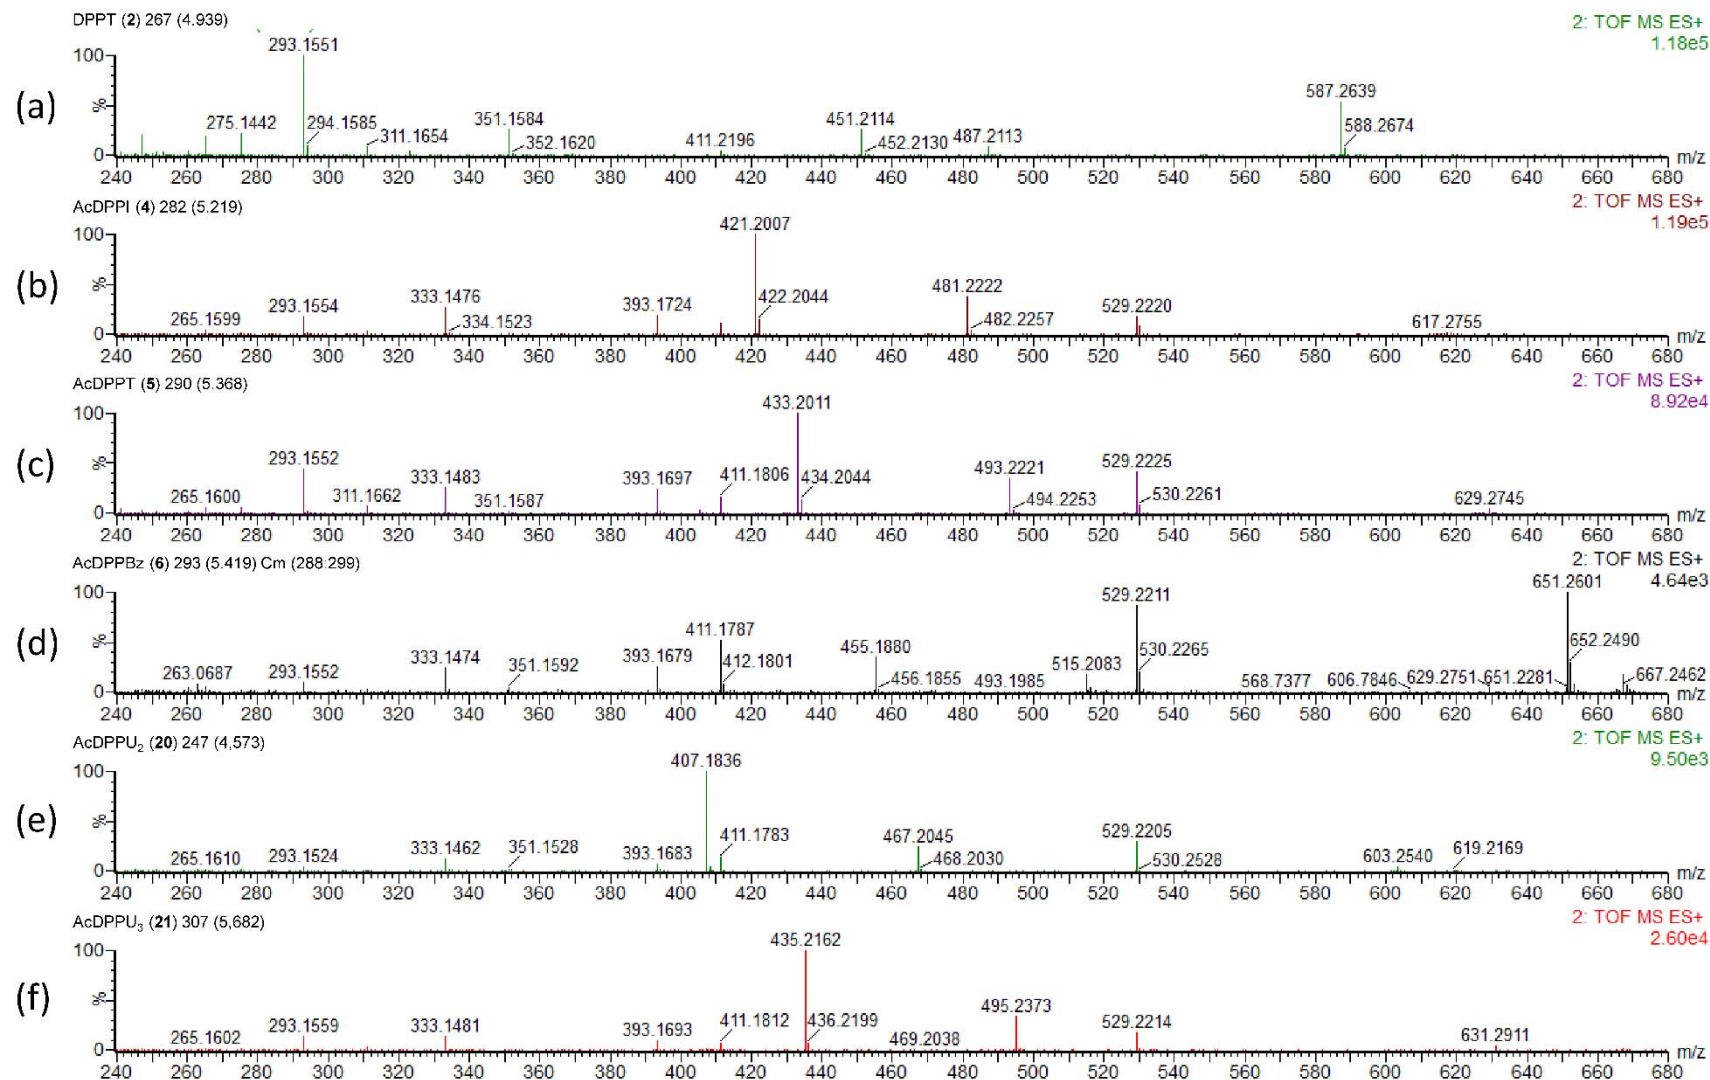

**Figure S21.** Comparison of HRMS<sup>E</sup> spectra (DIA) [1] for (a) DPPT (2), (b) AcDPPI (4), (c) AcDPPT (5), (d) AcDPPBz (6), (e) AcDPPU<sub>2</sub> (20) and (f) AcDPPU<sub>3</sub> (21), m/z range 240-680 (data acquired in ESI positive mode with a ramp trap collision energy of the high-energy function set at 60-120 eV).

# Supplementary Material

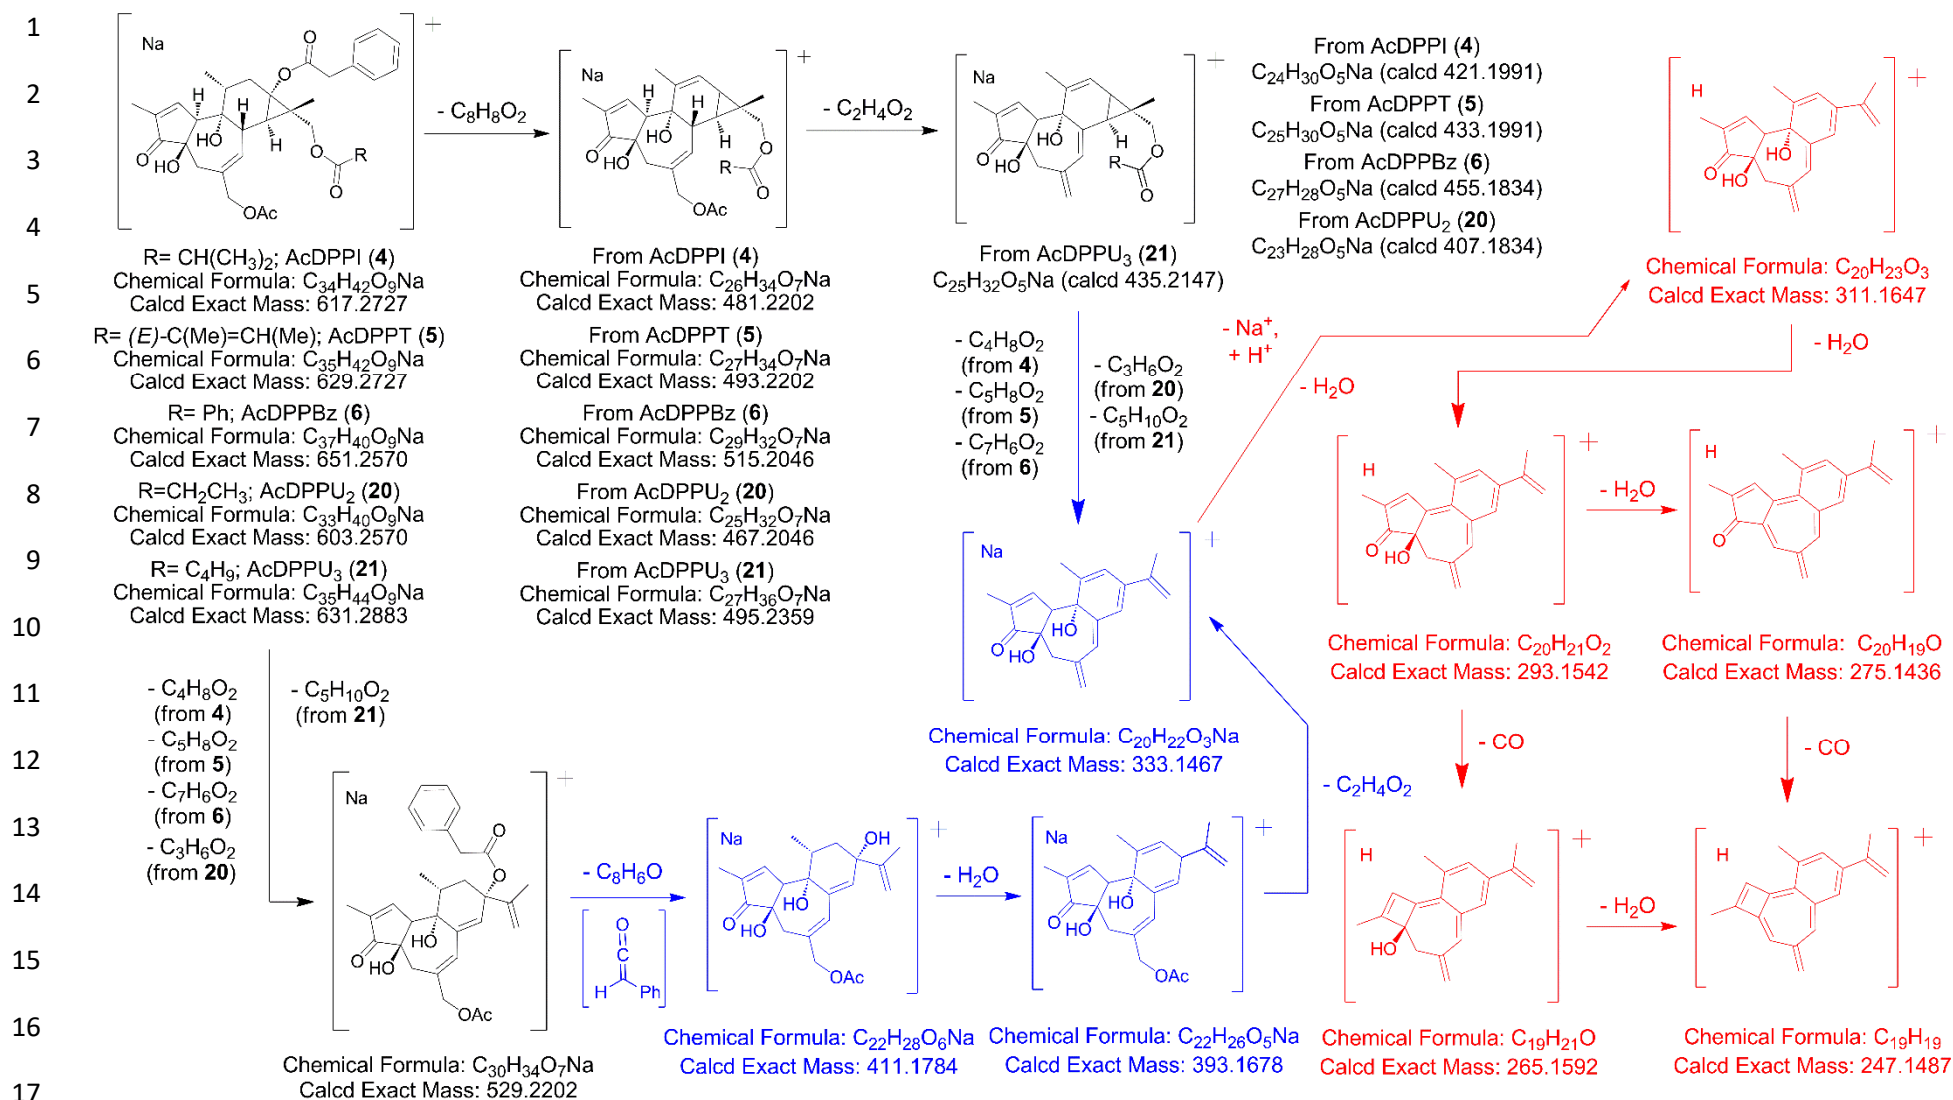

**Figure S22.** Proposed fragmentation route for selected ions on HRMS<sup>E</sup> spectrum (DIA) [1], in ESI positive mode, for AcDPPI (4), AcDPPT (5), AcDPPBz (6), AcDPPU<sub>2</sub> (20) and AcDPPU<sub>3</sub> (21). In red, common daughter ions with group A compounds (see section 2.2 and Figure S20).

# Supplementary Material

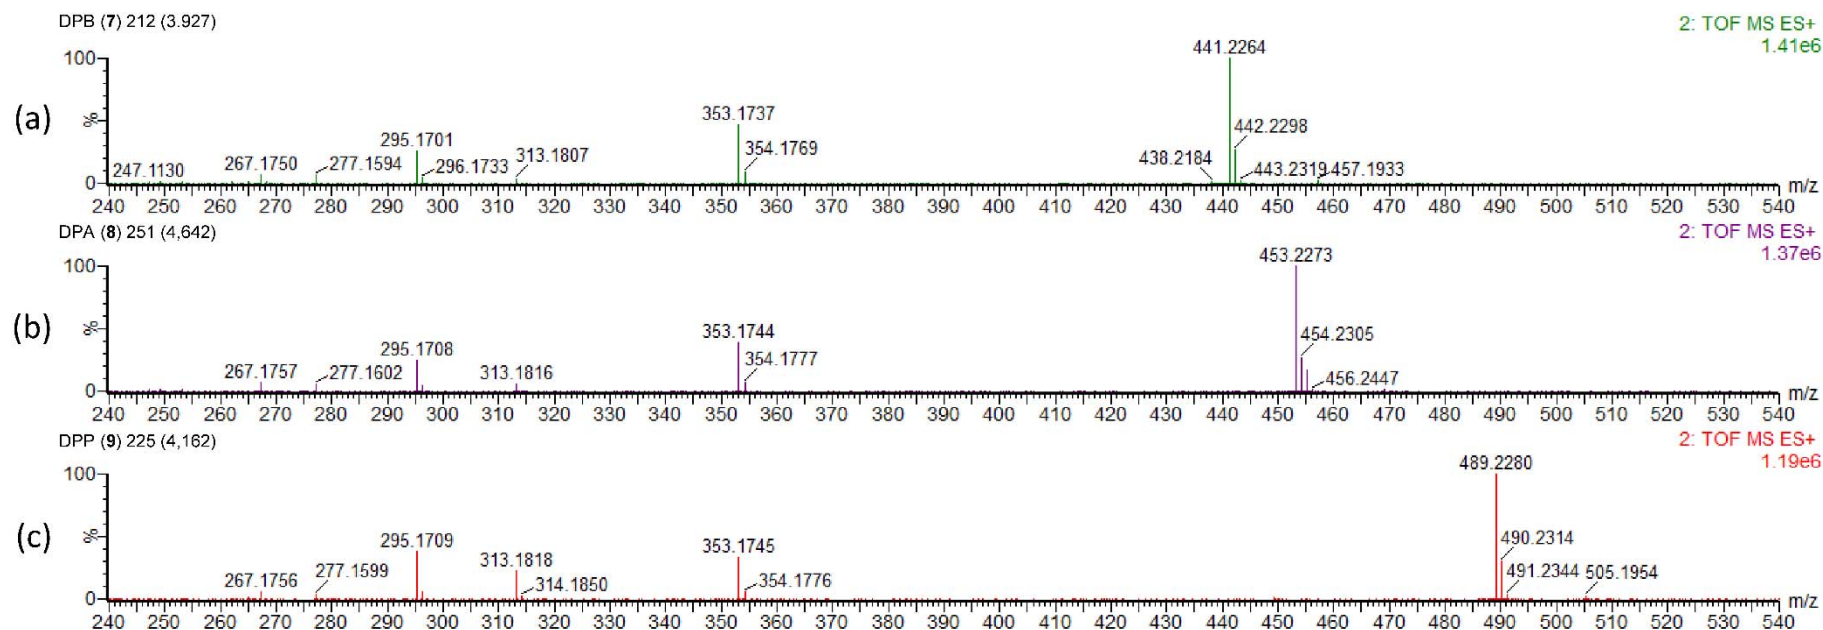

**Figure S23.** Comparison of HRMS<sup>E</sup> spectra (DIA) [1] for (a) DPB (7), (b) DPA (8) and (c) DPP (9), m/z range 240-540 (data acquired in ESI positive mode with a ramp trap collision energy of the high-energy function set at 10-40 eV).

## Supplementary Material

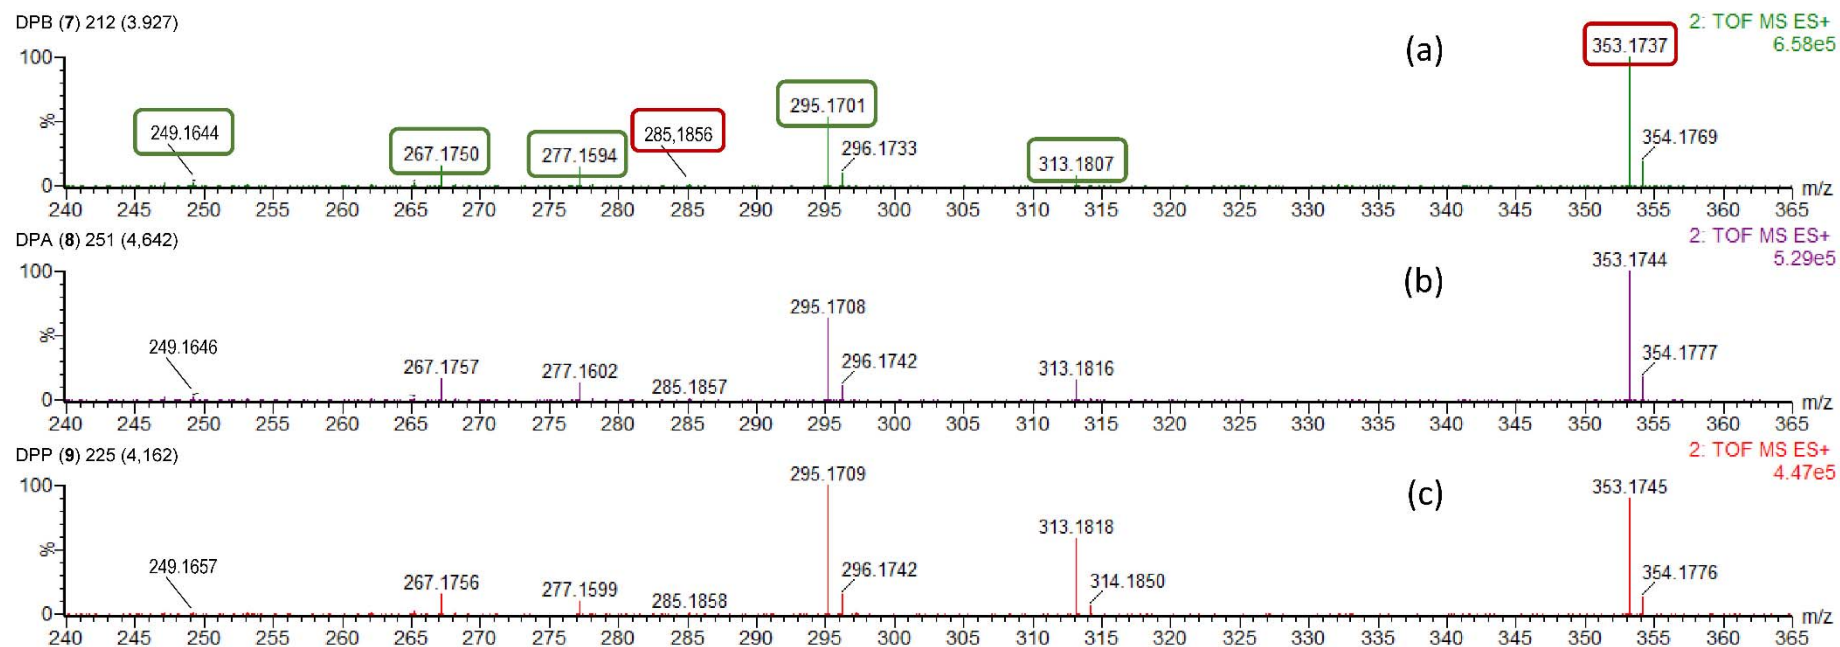

**Figure S24.** Comparison of HRMS<sup>E</sup> spectra (DIA) [1] for: (a) DPB (7), (b) DPA (8) and, (c) DPP (9) X23; m/z range 240-365 (m/z range 240-540 in Figure S23) (data acquired in positive ionization with a ramp trap collision energy of the high-energy function set at 10-40 eV). Compounds 7, 8 and 9 show daughter ions from their corresponding [M+Na]<sup>+</sup> molecular ions (see Figure S23) in their HRMS<sup>E</sup> spectra at m/z 313.1804, 295.1698, 277.1592, 267.1749 and 249.1643 (calculated) (in green in Scheme 3, Figures S24a and S25) which could be assigned to losses of water (1, 2 and 3 molecules), 2 molecules of water and CO and 3 molecules of water and CO, respectively, from a precursor ion at m/z 353.1729 (calculated) (in red in Scheme 3, Figures S24a and S25) (Table S2). Last mentioned ion, which is relatively abundant in HRMS<sup>E</sup> spectra of DPB (7) DPA (8) and DPP (9) (Table S2, Figures S23 and S24) originates from a loss of an ester group at C-13 from parent molecular ions in each compound (Figure S23). See proposed fragmentation route for selected ions mentioned above in Scheme 3 and Figure S25, together with colour key

# Supplementary Material

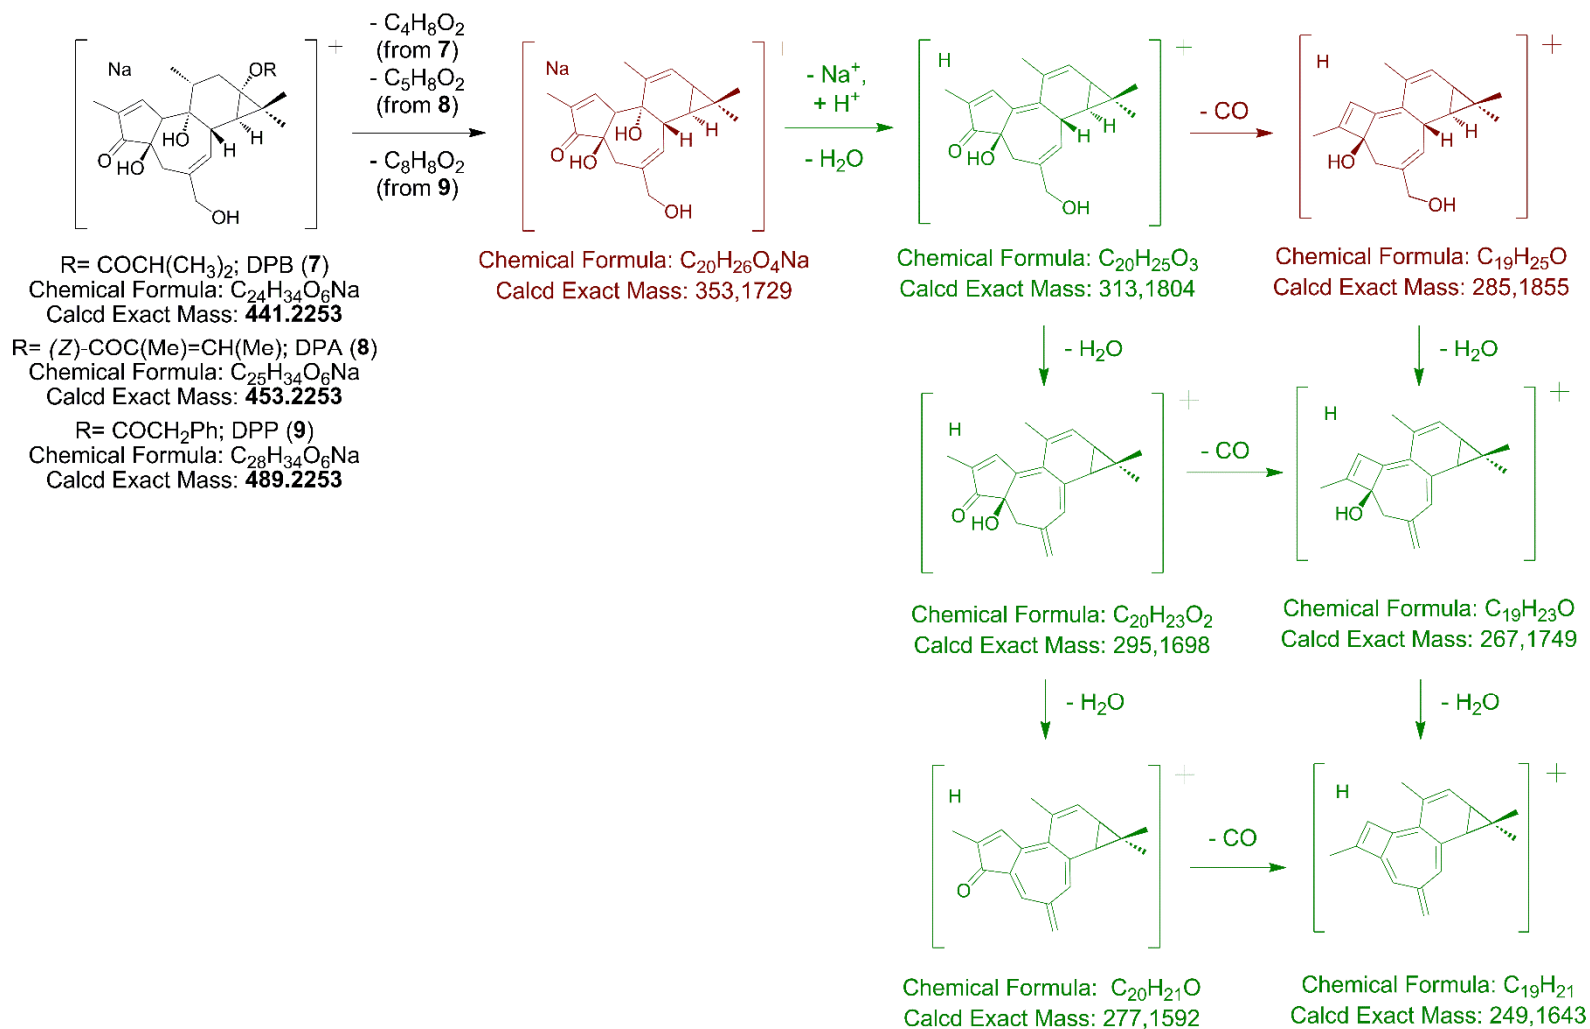

**Figure S25.** Proposed fragmentation route for selected ions on HRMS<sup>E</sup> spectrum (DIA) [1], in ESI positive mode, for DPB (7), DPA (8) and DPP (9). In green, common daughter ions with group D compounds (see section 2.2 and Figure S29).



# Supplementary Material

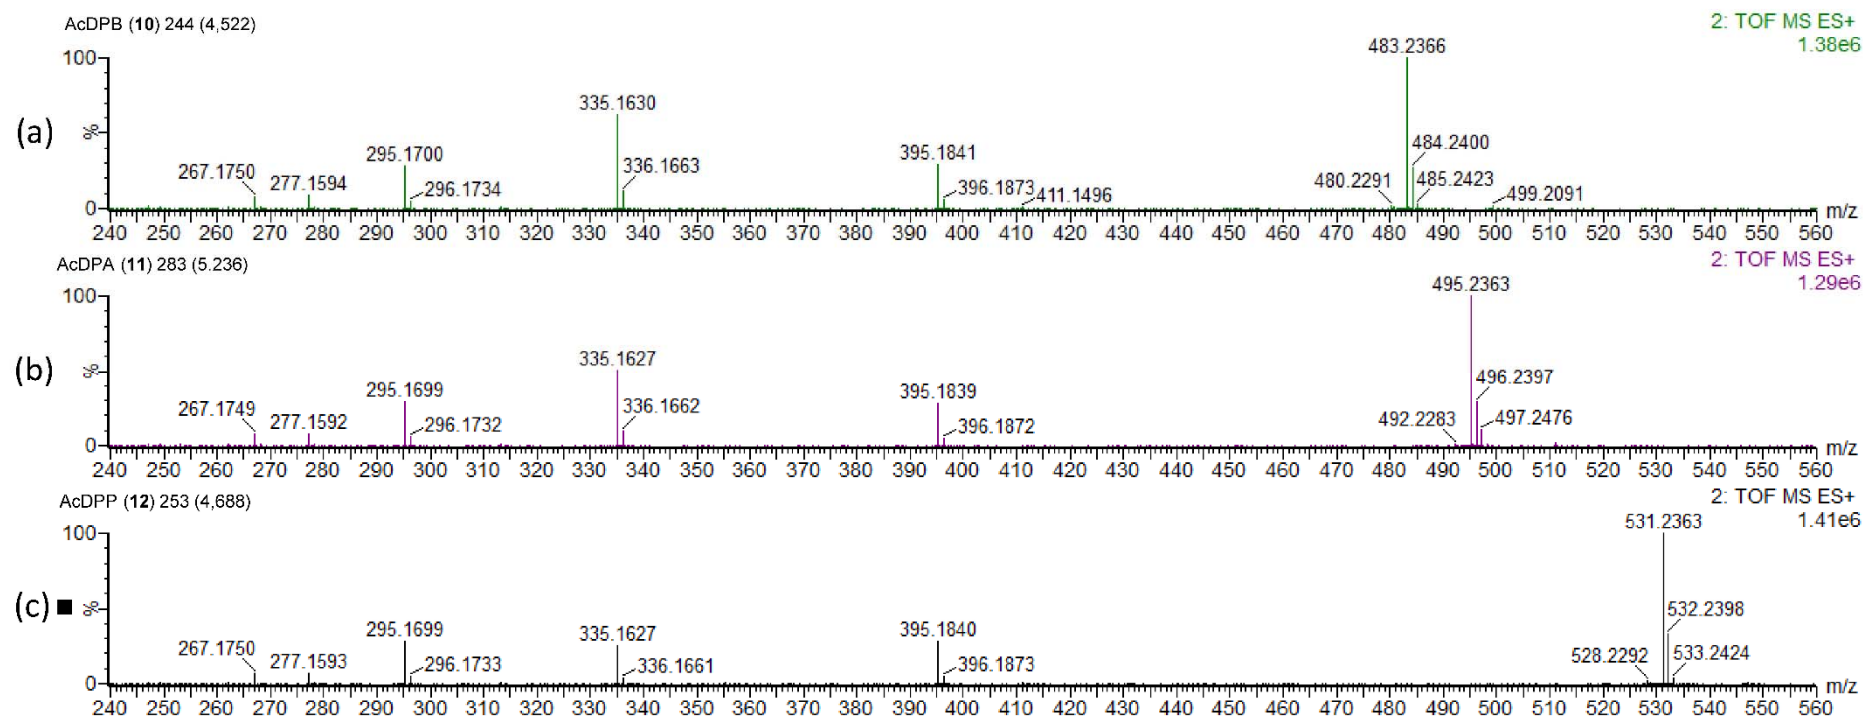

**Figure S26.** Comparison of HRMS<sup>E</sup> spectra (DIA) [1] for (a) AcDPB (10), (b) AcDPA (11), and (c) AcDPP (12), m/z range 240-560 (data acquired in ESI positive mode with a ramp trap collision energy of the high-energy function set at 10-40 eV).

# Supplementary Material

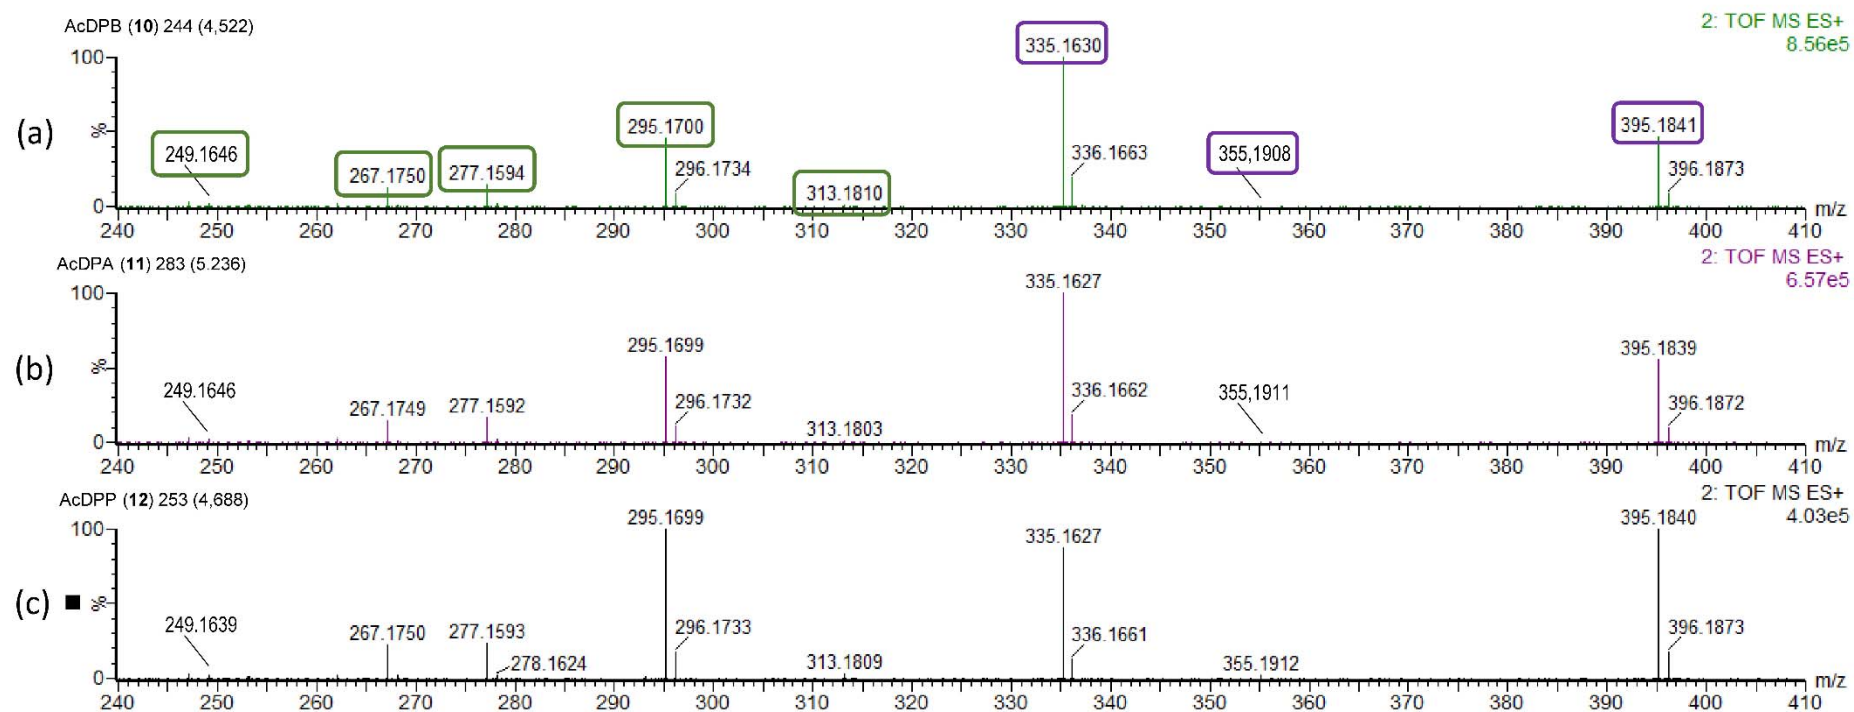

**Figure S27.** Comparison of HRMS<sup>E</sup> spectra (DIA) [1] for (a) AcDPB (10), (b) AcDPA (11), and (c) AcDPP (12), m/z range 240-410 (data acquired in ESI positive mode with a ramp trap collision energy of the high-energy function set at 10-40 eV).

# Supplementary Material

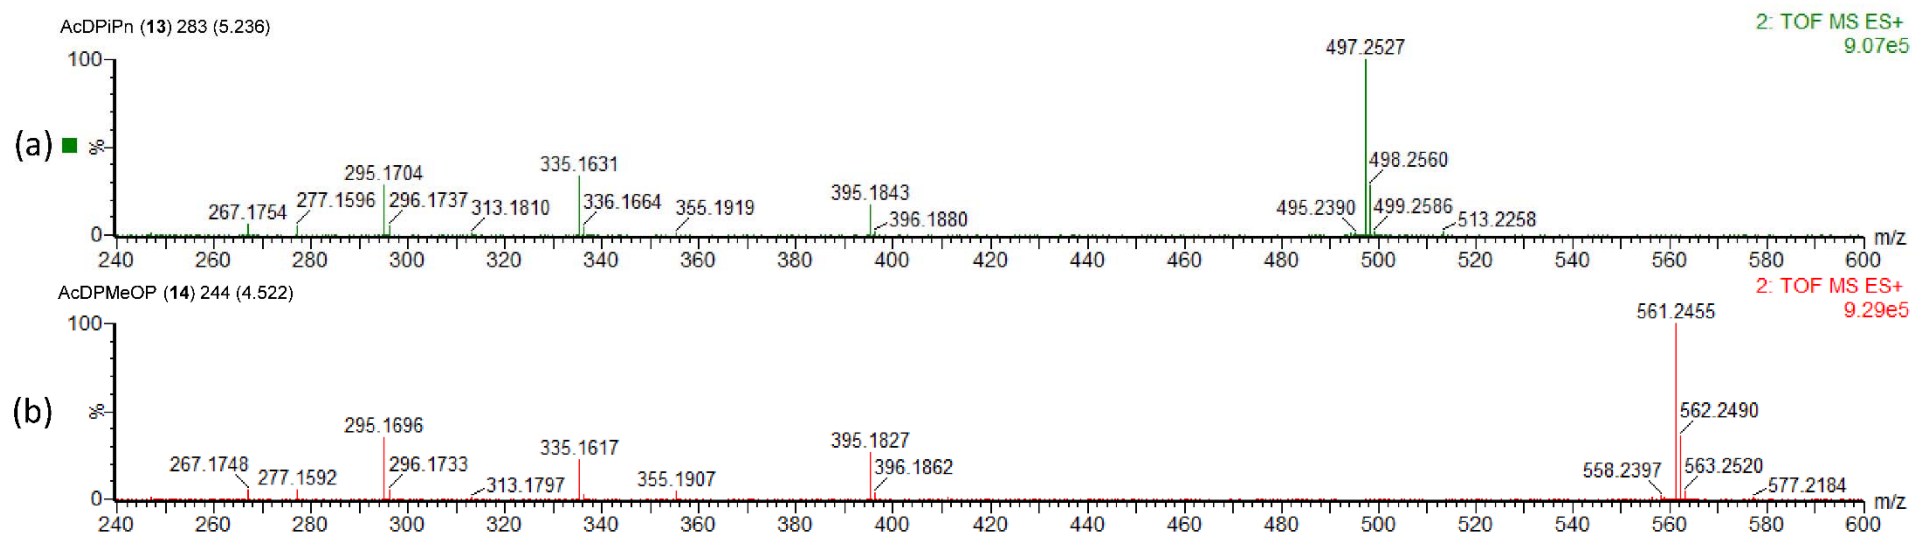

**Figure S28.** Comparison of HRMS<sup>E</sup> spectra (DIA) [1] for (a) AcDPiPn (13) and (b) AcDPMeOP (14),  $m/z$  range 240-600 ( $m/z$  range 240-410 in Figure 7) (data acquired in ESI positive mode with a ramp trap collision energy of the high-energy function set at 10-40 eV).



- 1
- 2
- 3
- 4
- 5
- 6
- 7
- 8
- 9
- 10
- 11
- 12
- 13
- 14
- 15
- 16
- 17
- 18
- 19
- 20
- 21
- 22
- 23
- 24
- 25
- 26
- 27
- 28

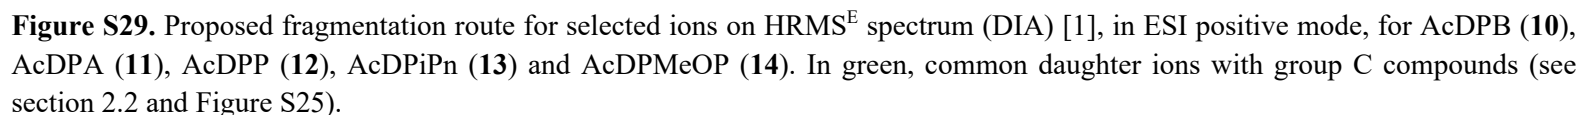

# Supplementary Material

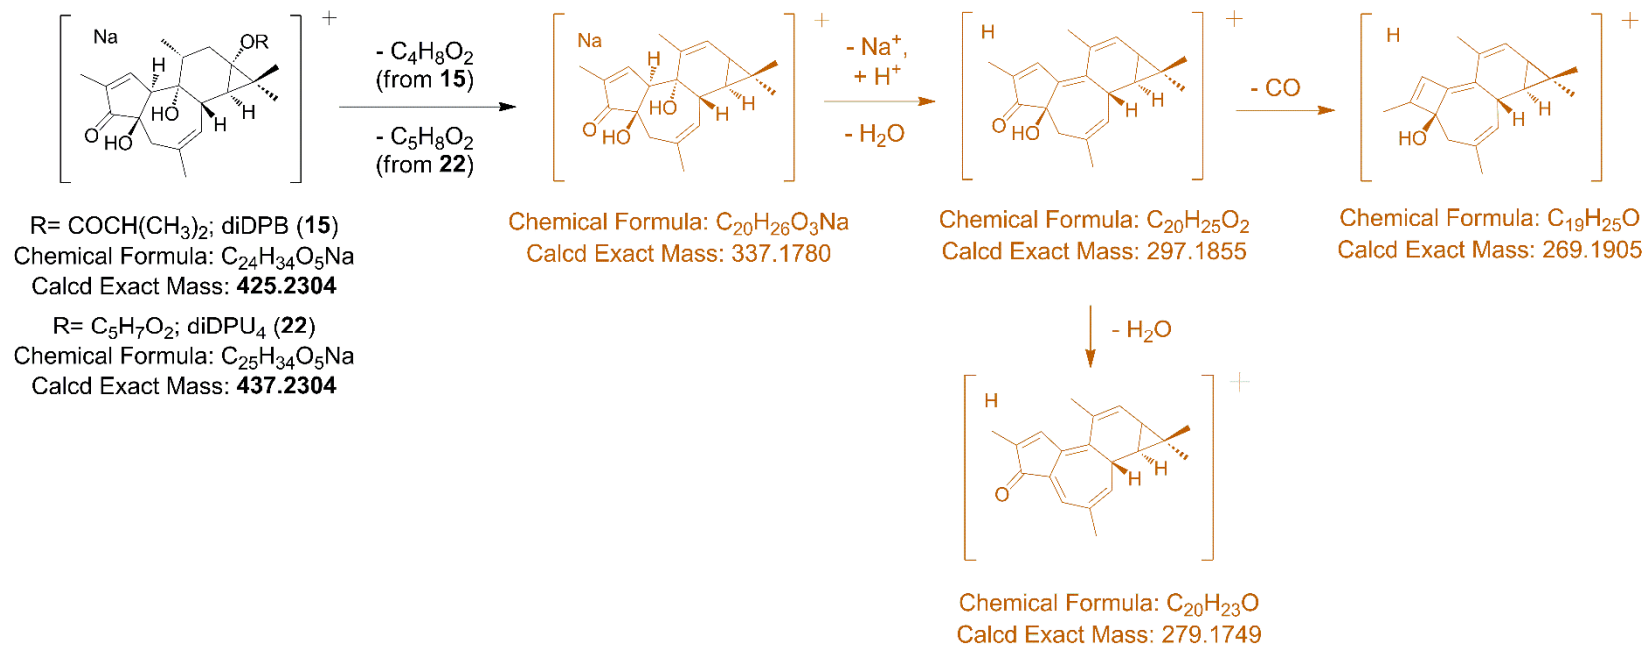

**Figure S30.** Proposed fragmentation route for selected ions on HRMS<sup>E</sup> spectrum (DIA) [1], in ESI positive mode, for diDPB (15) and diDPU<sub>4</sub> (22).

## Supplementary Material

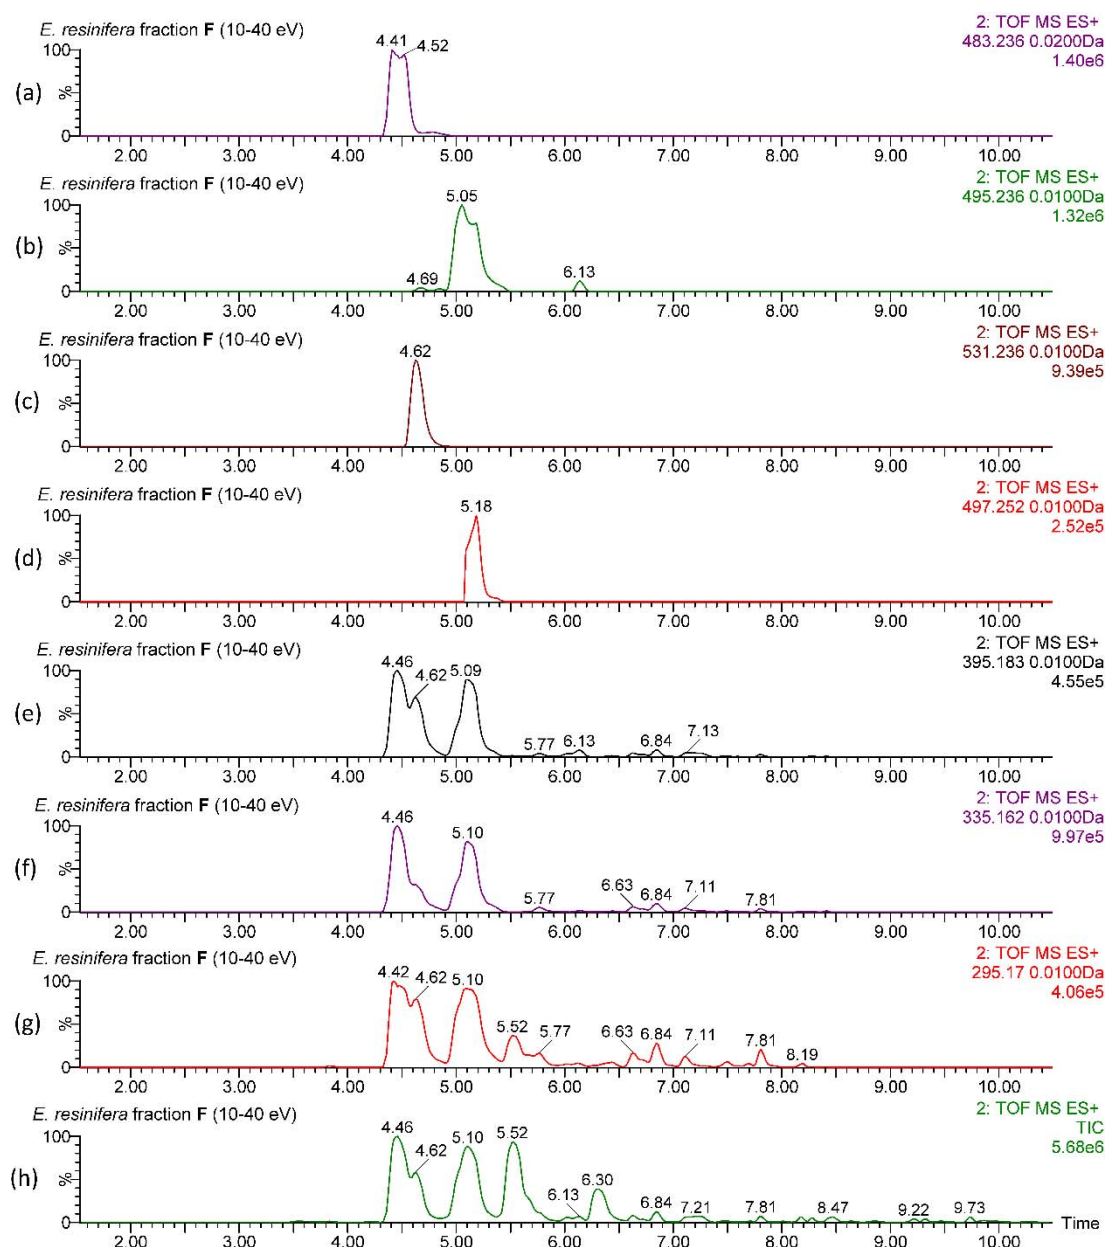

**Figure S31.** Total Ion Current (TIC) and eXtracted Ion Chromatograms (XICs), at selected  $m/z$  previously observed in high energy HRMS<sup>E</sup> of 12-deoxyphorbol 20-acetate-13-acyl derivatives, obtained from UHPLC-HRMS<sup>E</sup> experiments for chromatographic fraction F of *E. resinifera* (data acquired in ESI positive mode with a ramp trap collision energy of the high-energy function set at 10-40 eV; high-energy function (2: TOF MS ES+)). XICs for 12-deoxyphorbol 20-acetate-13-acyl derivatives  $[M+Na]^+$  molecular ions:  $m/z$  483.2359 calculated mass for (a) C<sub>26</sub>H<sub>36</sub>O<sub>7</sub>Na (AcDPB (10)); (b)  $m/z$  495.2359 calculated mass for C<sub>27</sub>H<sub>36</sub>O<sub>7</sub>Na (AcDPA (11)); (c)  $m/z$  531.236, calculated mass for C<sub>30</sub>H<sub>36</sub>O<sub>7</sub>Na (AcDPP (12)) and (d)  $m/z$  497.2515, calculated mass for C<sub>27</sub>H<sub>38</sub>O<sub>7</sub>Na (AcDPiPn (13)). XICs for selected featured ions of 12-deoxyphorbol 20-acetate-13-acyl derivatives HRMS<sup>E</sup> spectra (see Scheme 4 and Figure S29) at: (e)  $m/z$  395.1834; (f)  $m/z$  335.1623; (g)  $m/z$  295.1698. (h) UHPLC-HRMS<sup>E</sup> chromatographic profile (TIC) of fraction F from *E. resinifera* extract.

## Supplementary Material

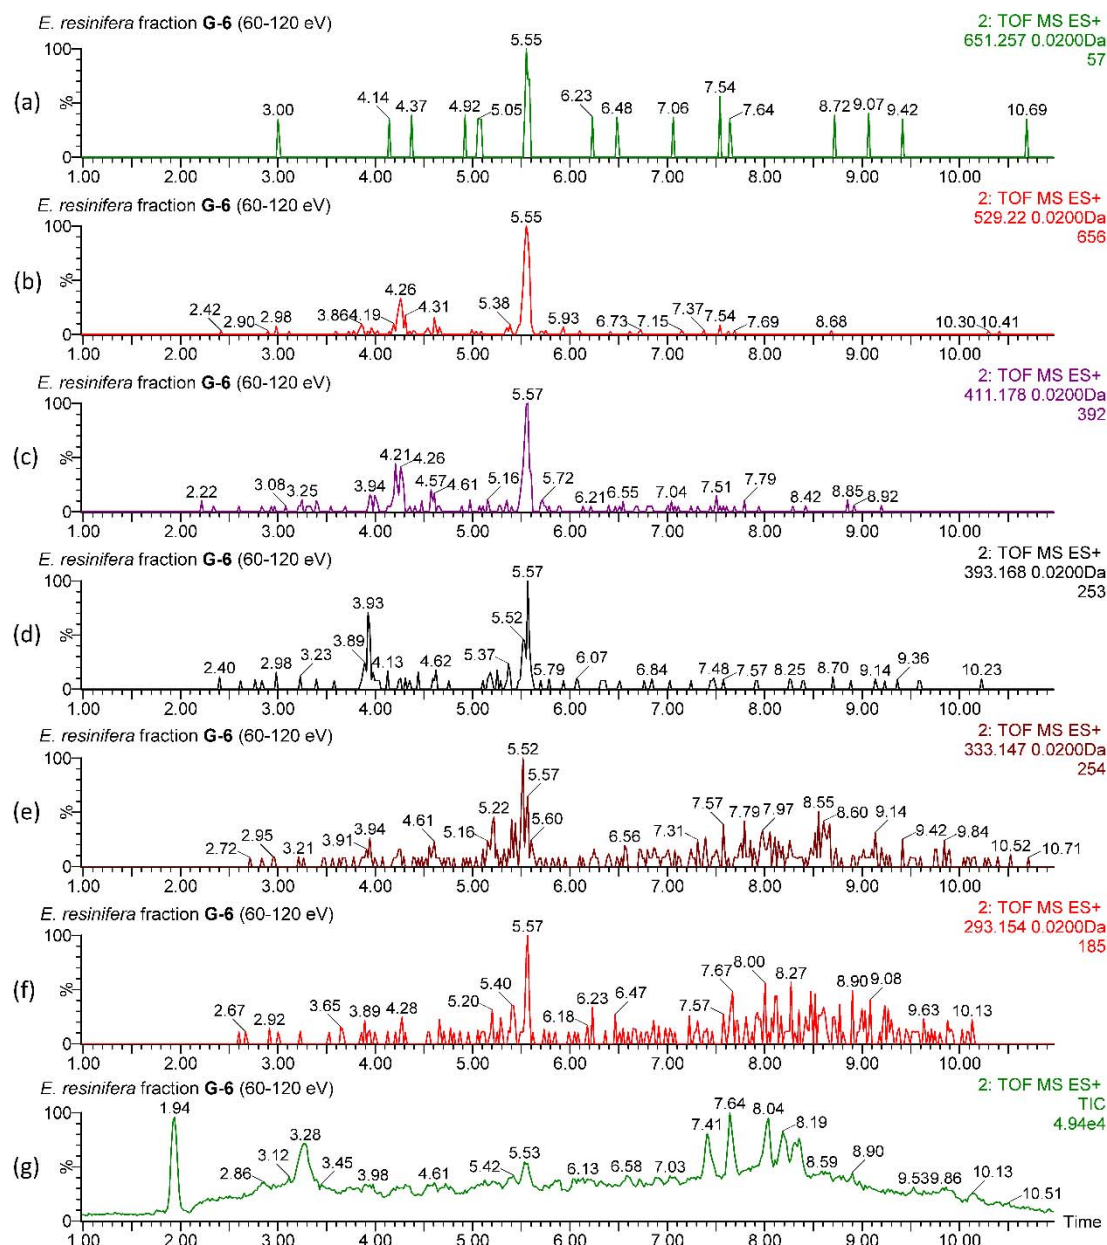

**Figure S32.** Total Ion Current (TIC) and eXtracted Ion Chromatograms (XICs), at selected  $m/z$  previously observed in high energy HRMS<sup>E</sup> of 12-deoxy-16-hydroxyphorbol 20-acetate-13,16-diacyl derivatives, obtained from UHPLC-HRMS<sup>E</sup> experiments for chromatographic fraction G-6 of *E. resinifera* (data acquired in ESI positive mode with a ramp trap collision energy of the high-energy function set at 60-120 eV; high-energy function (2: TOF MS ES<sup>+</sup>)). XIC for 12-deoxy-16-hydroxyphorbol 20-acetate-16-benzoate-13-phenylacetate (AcDPPBz (6)) [M+Na]<sup>+</sup> molecular ion: (a)  $m/z$  651.2565, calculated mass for C<sub>37</sub>H<sub>40</sub>O<sub>9</sub>Na. XICs for selected characteristic ions of 16-hydroxy-12-deoxyphorbol 20-acetate-13,16-diacyl derivatives HRMS<sup>E</sup> spectra (see Scheme 2 and Figure S22) at (b)  $m/z$  529.2202, (c)  $m/z$  411.1784, (d)  $m/z$  393.1678, (e)  $m/z$  333.1467 and  $m/z$  (f) 293.1542. (g) TIC of UHPLC-HRMS<sup>E</sup> chromatographic profile of fraction G-6 from *E. resinifera* extract.

## Supplementary Material

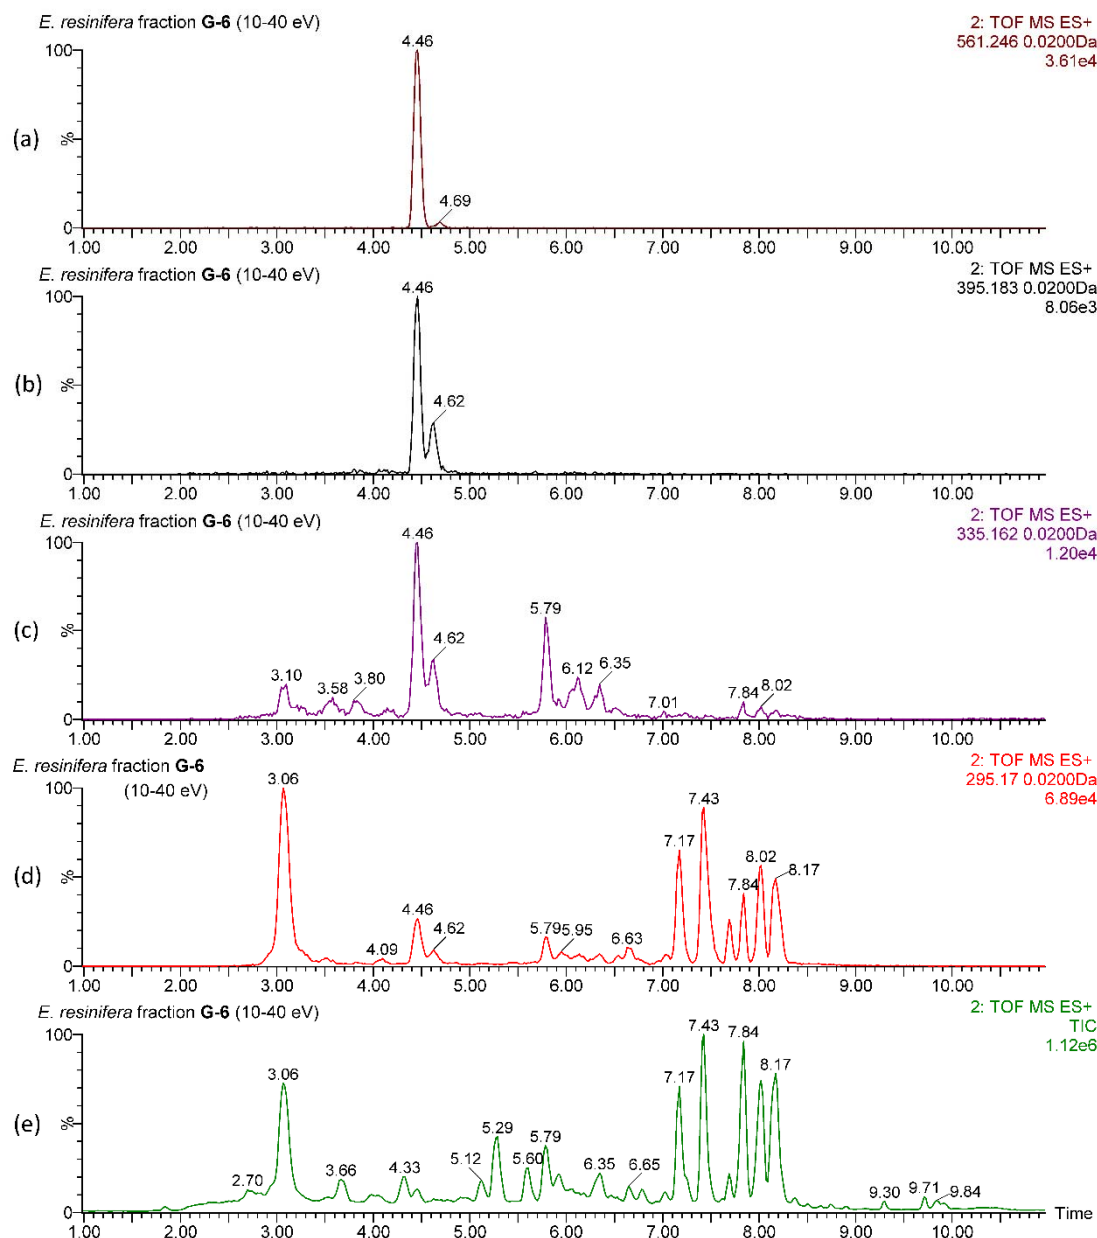

**Figure S33.** Total Ion Current (TIC) and eXtracted Ion Chromatograms (XICs), at selected  $m/z$  previously observed in high energy HRMS<sup>E</sup> of 12-deoxyphorbol 20-acetate-13-acyl derivatives, obtained from UHPLC-HRMS<sup>E</sup> experiments for chromatographic fraction G-6 of *E. resinifera* (data acquired in ESI positive mode with a ramp trap collision energy of the high-energy function set at 10-40 eV; high-energy function (2: TOF MS ES+)). XIC for 12-deoxyphorbol 20-acetate-13-(*p*-methoxyphenyl)acetate (AcDPMOP (**14**))  $[M+Na]^+$  molecular ion: (a)  $m/z$  561.2464 calculated mass for C<sub>31</sub>H<sub>38</sub>O<sub>8</sub>Na. XICs for selected featured ions of 12-deoxyphorbol 20-acetate-13-acyl derivatives HRMS<sup>E</sup> spectra (see Scheme 4 and Figure S29) at: (b)  $m/z$  395.1834; (c)  $m/z$  335.1623; (d)  $m/z$  295.1698. (e) UHPLC-HRMS<sup>E</sup> chromatographic profile (TIC) of fraction G-6 from *E. resinifera* extract.



## Supplementary Material

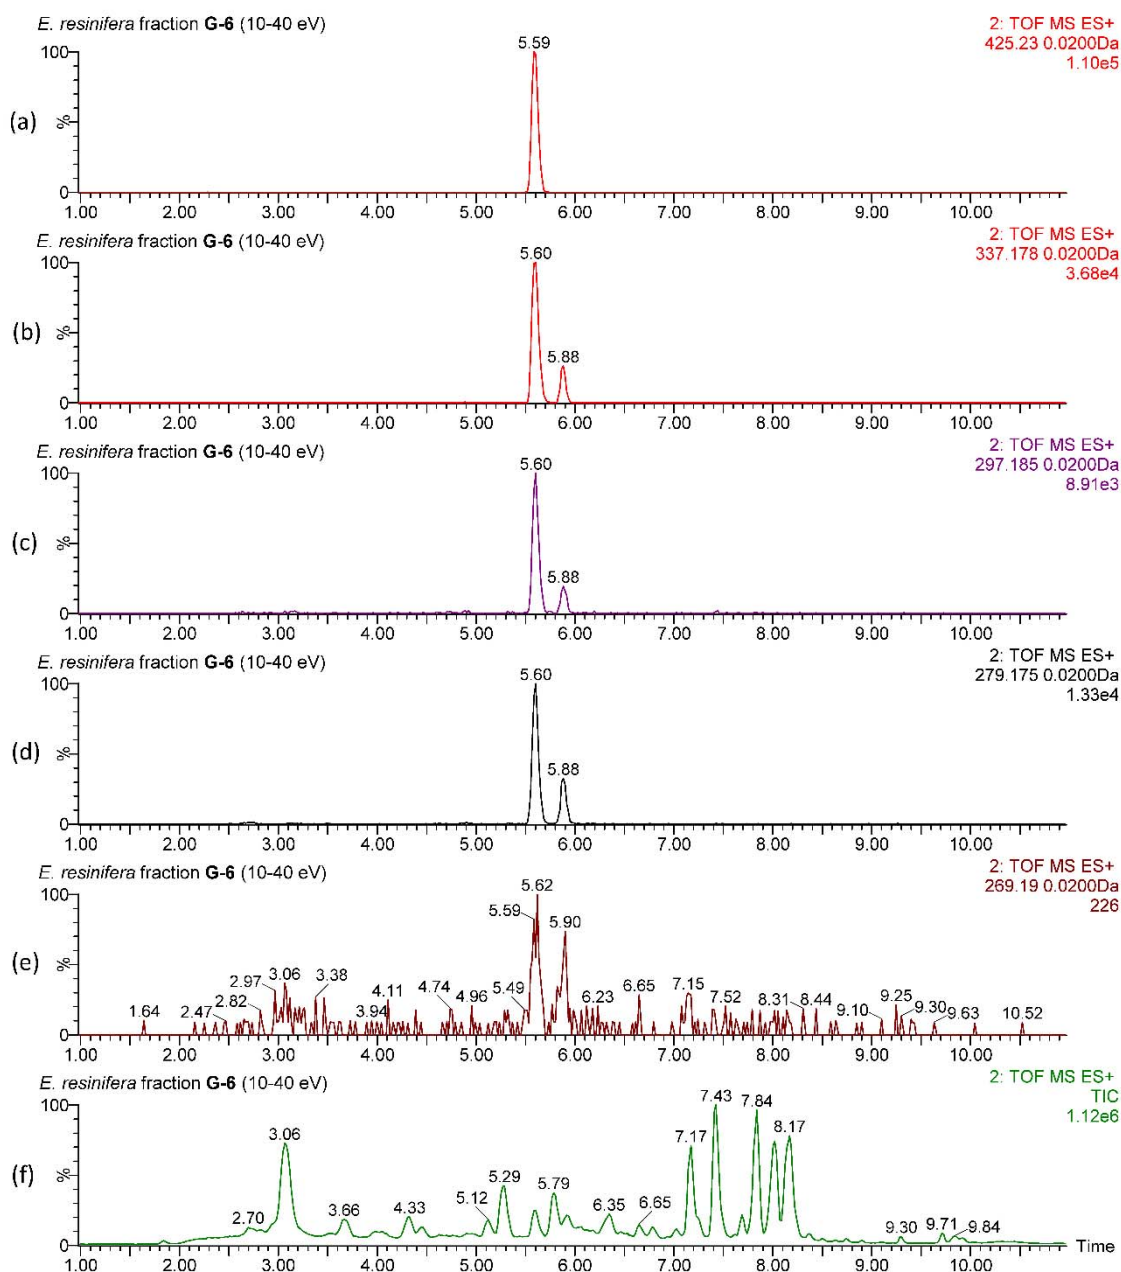

**Figure S34.** Total Ion Current (TIC) and eXtracted Ion Chromatograms (XICs), at selected  $m/z$  previously observed in high energy HRMS<sup>E</sup> of 12,20-dideoxyphorbol 13-acyl derivatives, obtained from UHPLC-HRMS<sup>E</sup> experiments for chromatographic fraction G-6 of *E. resinifera* (data acquired in ESI positive mode with a ramp trap collision energy of the high-energy function set at 10-40 eV; high-energy function (2: TOF MS ES+)). XIC for 12,20-dideoxyphorbol 13-isobutyrate (diDPB (**15**))  $[M+Na]^+$  molecular ion: (a)  $m/z$  425.2304 calculated mass for  $C_{24}H_{34}O_5Na$ . XICs for selected featured ions of 12,20-dideoxyphorbol 13-acyl derivatives HRMS<sup>E</sup> spectra (see Scheme 5 and Figure S30) at: (b)  $m/z$  337.1780; (c)  $m/z$  297.1855; (d)  $m/z$  279.1749 and (e)  $m/z$  269.1905. (f) UHPLC-HRMS<sup>E</sup> chromatographic profile (TIC) of fraction G-6 from *E. resinifera* extract.

## Supplementary Material

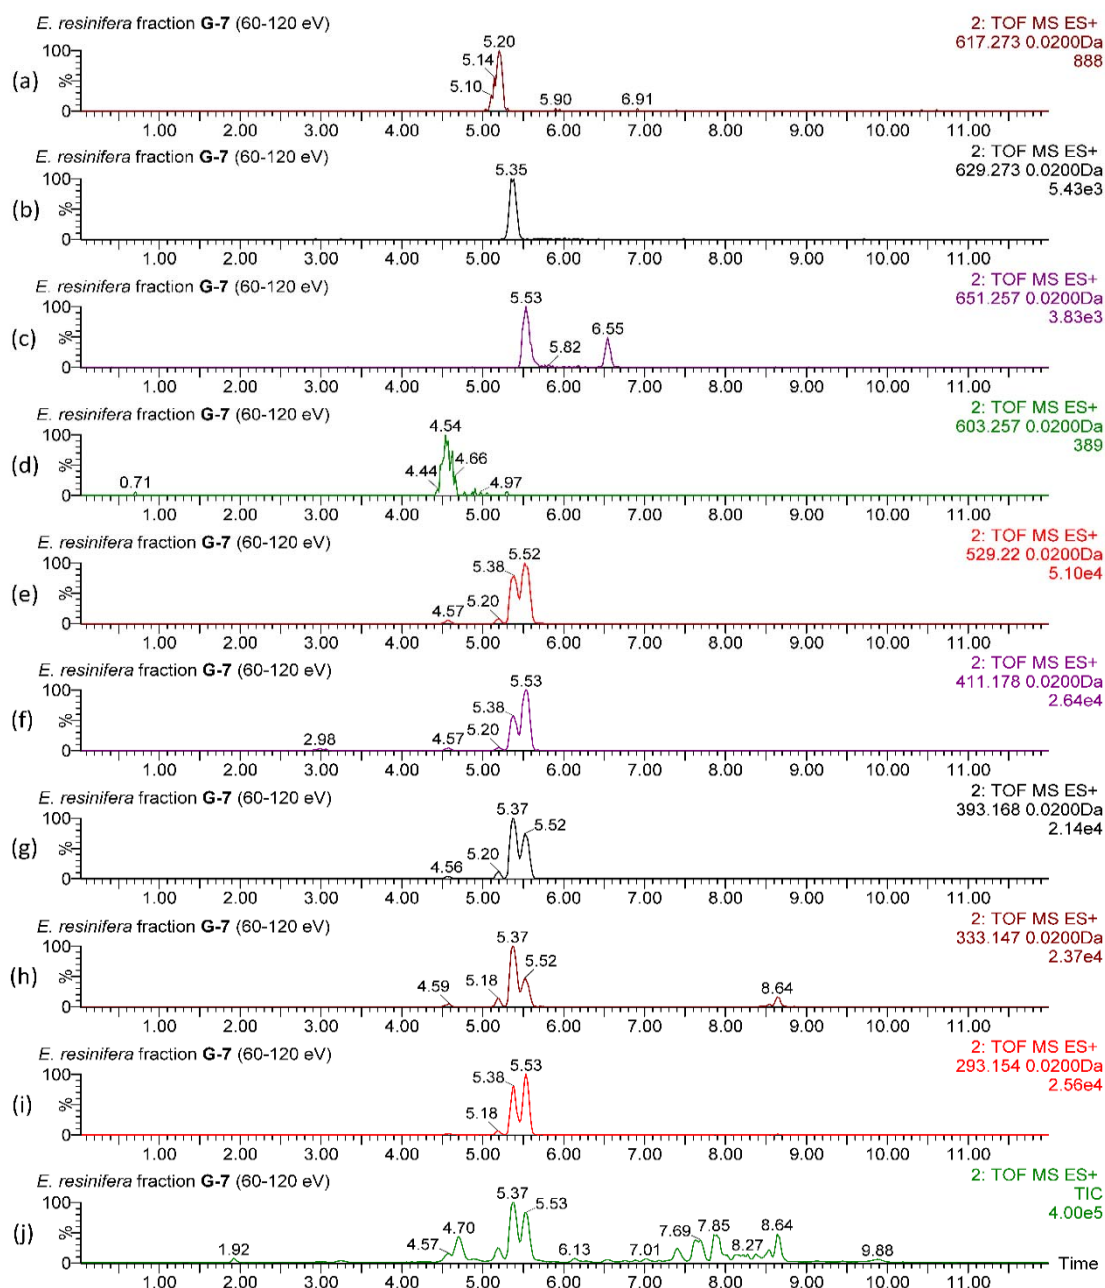

**Figure S35.** Total Ion Current (TIC) and eXtracted Ion Chromatograms (XICs), at selected  $m/z$  previously observed in high energy HRMS<sup>E</sup> of 12-deoxy-16-hydroxyphorbol 20-acetate-13,16-diacyl derivatives, obtained from UHPLC-HRMS<sup>E</sup> experiments for chromatographic fraction G-7 of *E. resinifera* (data acquired in ESI positive mode with a ramp trap collision energy of the high-energy function set at 60-120 eV; high-energy function (2: TOF MS ES<sup>+</sup>)). XIC for 12-deoxy-16-hydroxyphorbol 20-acetate-13,16-diacyl derivatives  $[M+Na]^+$  molecular ions: (a)  $m/z$  617.2727, calculated mass for  $C_{34}H_{42}O_9Na$  (AcDPPI (4)); (b)  $m/z$  629.2727, calculated mass for  $C_{35}H_{42}O_9Na$  (AcDPPT (5)); (c)  $m/z$  651.2565, calculated mass for  $C_{37}H_{40}O_9Na$  (AcDPPBz (6)); (d)  $m/z$  603.2570, calculated mass for  $C_{33}H_{40}O_9Na$  (AcDPPU<sub>2</sub> (20)). XICs for selected characteristic ions of 16-hydroxy-12-deoxyphorbol 20-acetate-13,16-diacyl derivatives HRMS<sup>E</sup> spectra (see Scheme 2 and Figure S22) at (e)  $m/z$  529.2202, (f)  $m/z$  411.1784, (g)  $m/z$  393.1678, (h)  $m/z$  333.1467 and (i)  $m/z$  293.1542. (j) TIC of UHPLC-HRMS<sup>E</sup> chromatographic profile of fraction G-7 from *E. resinifera* extract.

## Supplementary Material

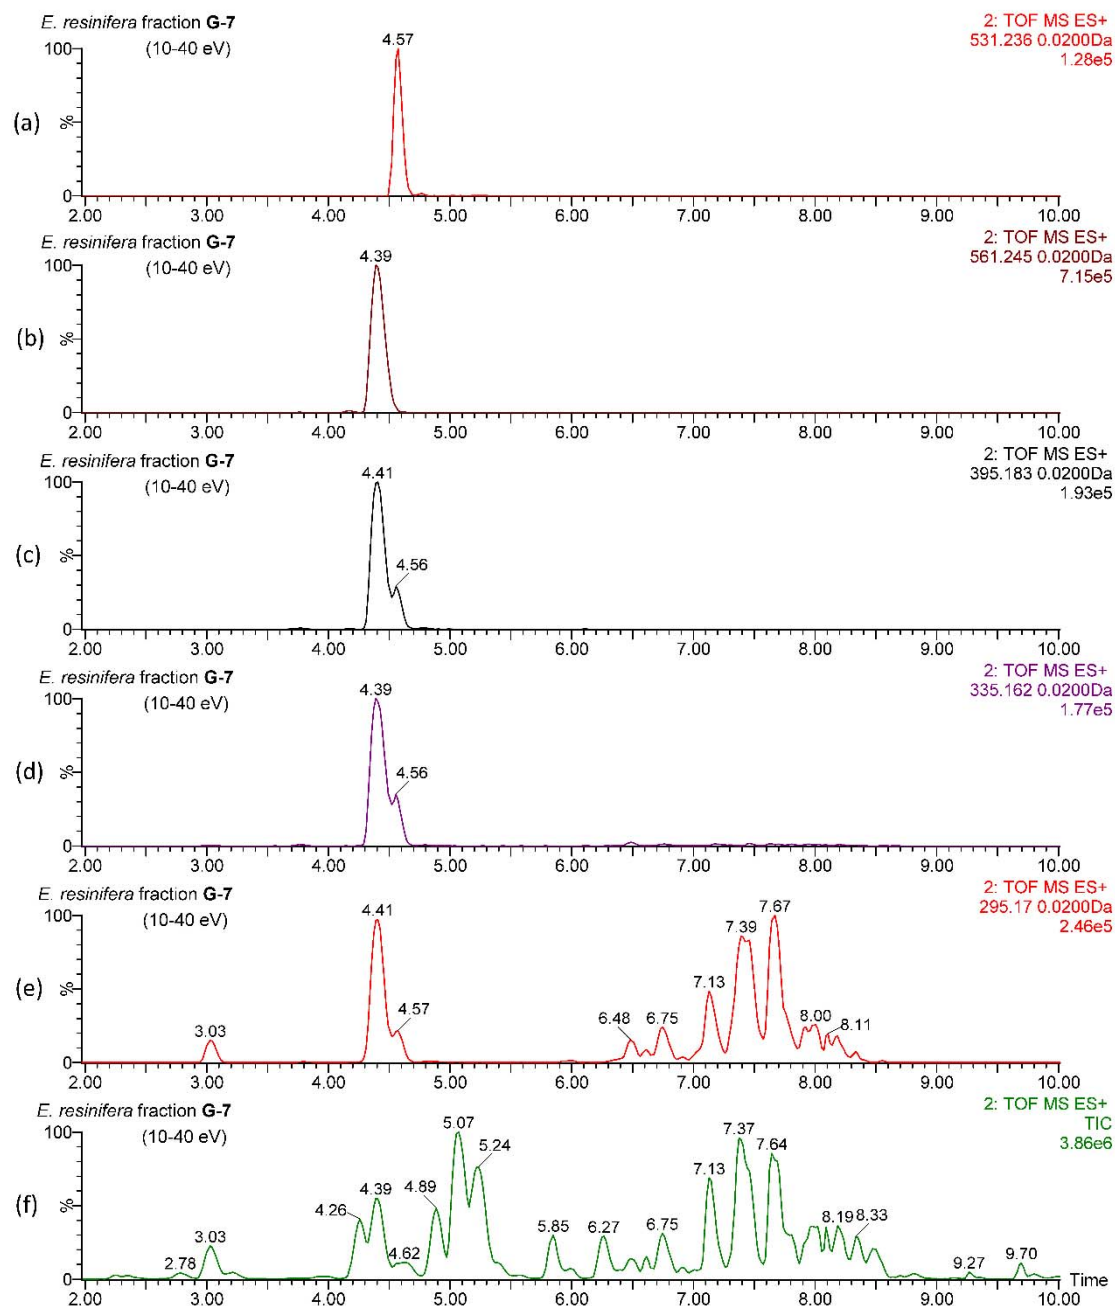

**Figure S36.** Total Ion Current (TIC) and eXtracted Ion Chromatograms (XICs), at selected  $m/z$  previously observed in high energy HRMS<sup>E</sup> of 12-deoxyphorbol 20-acetate-13-acyl derivatives, obtained from UHPLC-HRMS<sup>E</sup> experiments for chromatographic fraction G-7 of *E. resinifera* (data acquired in ESI positive mode with a ramp trap collision energy of the high-energy function set at 10-40 eV; high-energy function (2: TOF MS ES+)). XICs for 12-deoxyphorbol 20-acetate-13-acyl derivatives  $[M+Na]^+$  molecular ions: (a)  $m/z$  531.236, calculated mass for  $C_{30}H_{36}O_7Na$  (AcDPP (**12**)); (b)  $m/z$  561.2464 calculated mass for  $C_{31}H_{38}O_8Na$  (AcDPMOP (**14**)). XICs for selected featured ions of 12-deoxyphorbol 20-acetate-13-acyl derivatives HRMS<sup>E</sup> spectra (see Scheme 4 and Figure S29) at: (c)  $m/z$  395.1834; (d)  $m/z$  335.1623; (e)  $m/z$  295.1698. (f) UHPLC-HRMS<sup>E</sup> chromatographic profile (TIC) of fraction G-7 from *E. resinifera* extract.



## Supplementary Material

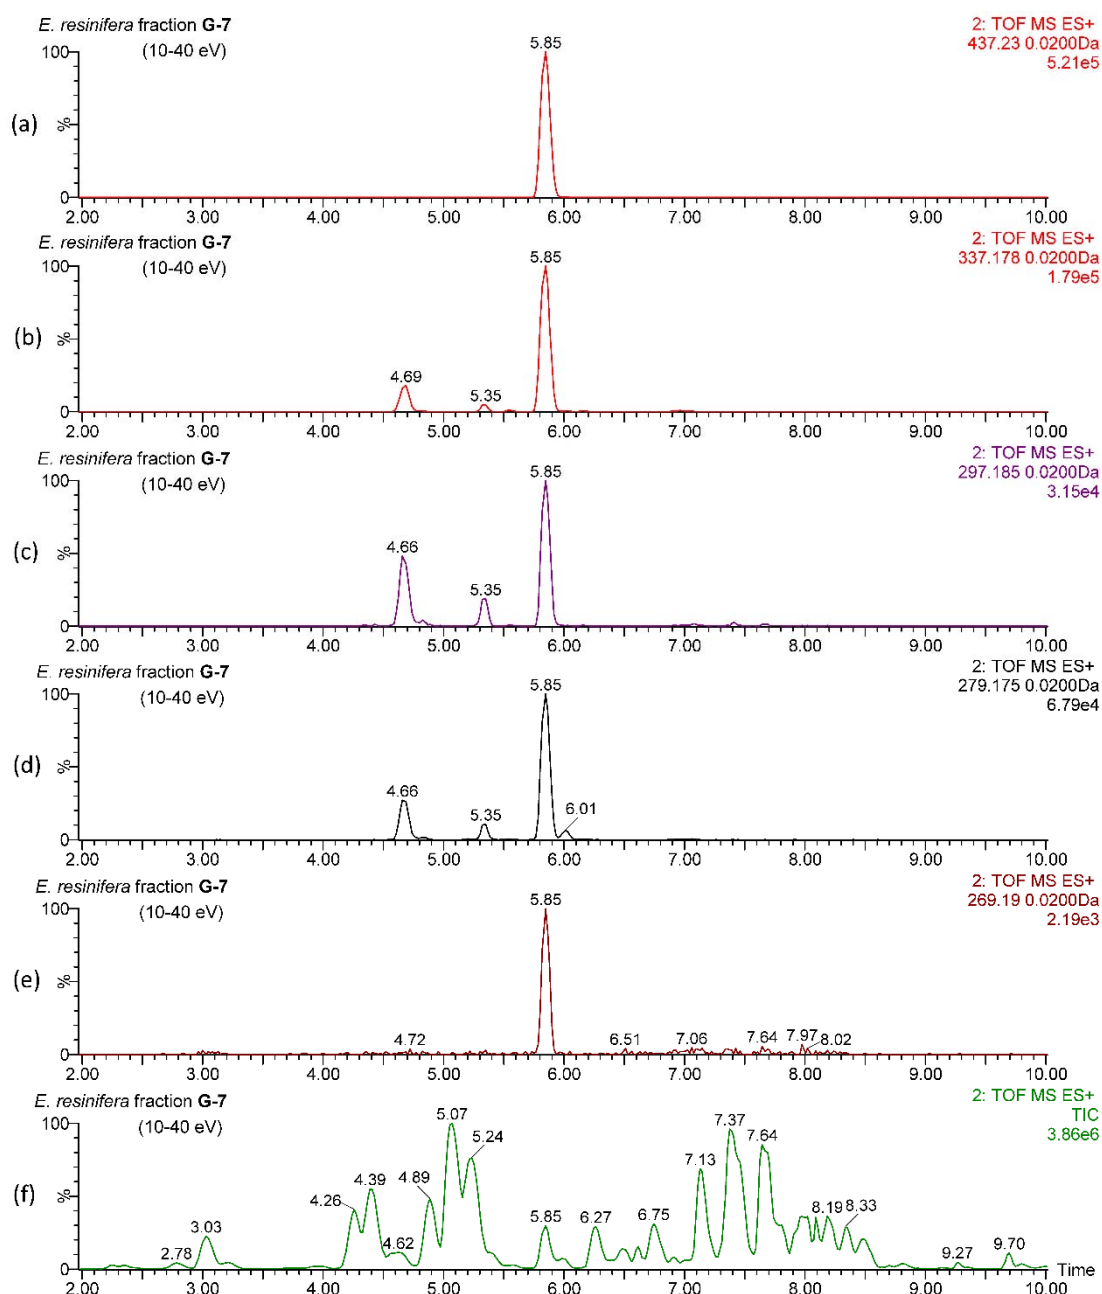

**Figure S37.** Total Ion Current (TIC) and eXtracted Ion Chromatograms (XICs), at selected  $m/z$  previously observed in high energy HRMS<sup>E</sup> of 12,20-dideoxyphorbol 13-acyl derivatives, obtained from UHPLC-HRMS<sup>E</sup> experiments for chromatographic fraction G-7 of *E. resinifera* (data acquired in ESI positive mode with a ramp trap collision energy of the high-energy function set at 10-40 eV; high-energy function (2: TOF MS ES+)). XIC for 12,20-dideoxyphorbol 13-acyl derivatives  $[M+Na]^+$  molecular ion: (a)  $m/z$  437.2304 calculated mass for C<sub>25</sub>H<sub>34</sub>O<sub>5</sub>Na (diDPU<sub>4</sub> (22)). XICs for selected featured ions of 12,20-dideoxyphorbol 13-acyl derivatives HRMS<sup>E</sup> spectra (see Scheme 5 and Figure S30) at: (b)  $m/z$  337.1780; (c)  $m/z$  297.1855; (d)  $m/z$  279.1749 and (e)  $m/z$  269.1905. (f) UHPLC-HRMS<sup>E</sup> chromatographic profile (TIC) of fraction G-7 from *E. resinifera* extract.

## Supplementary Material

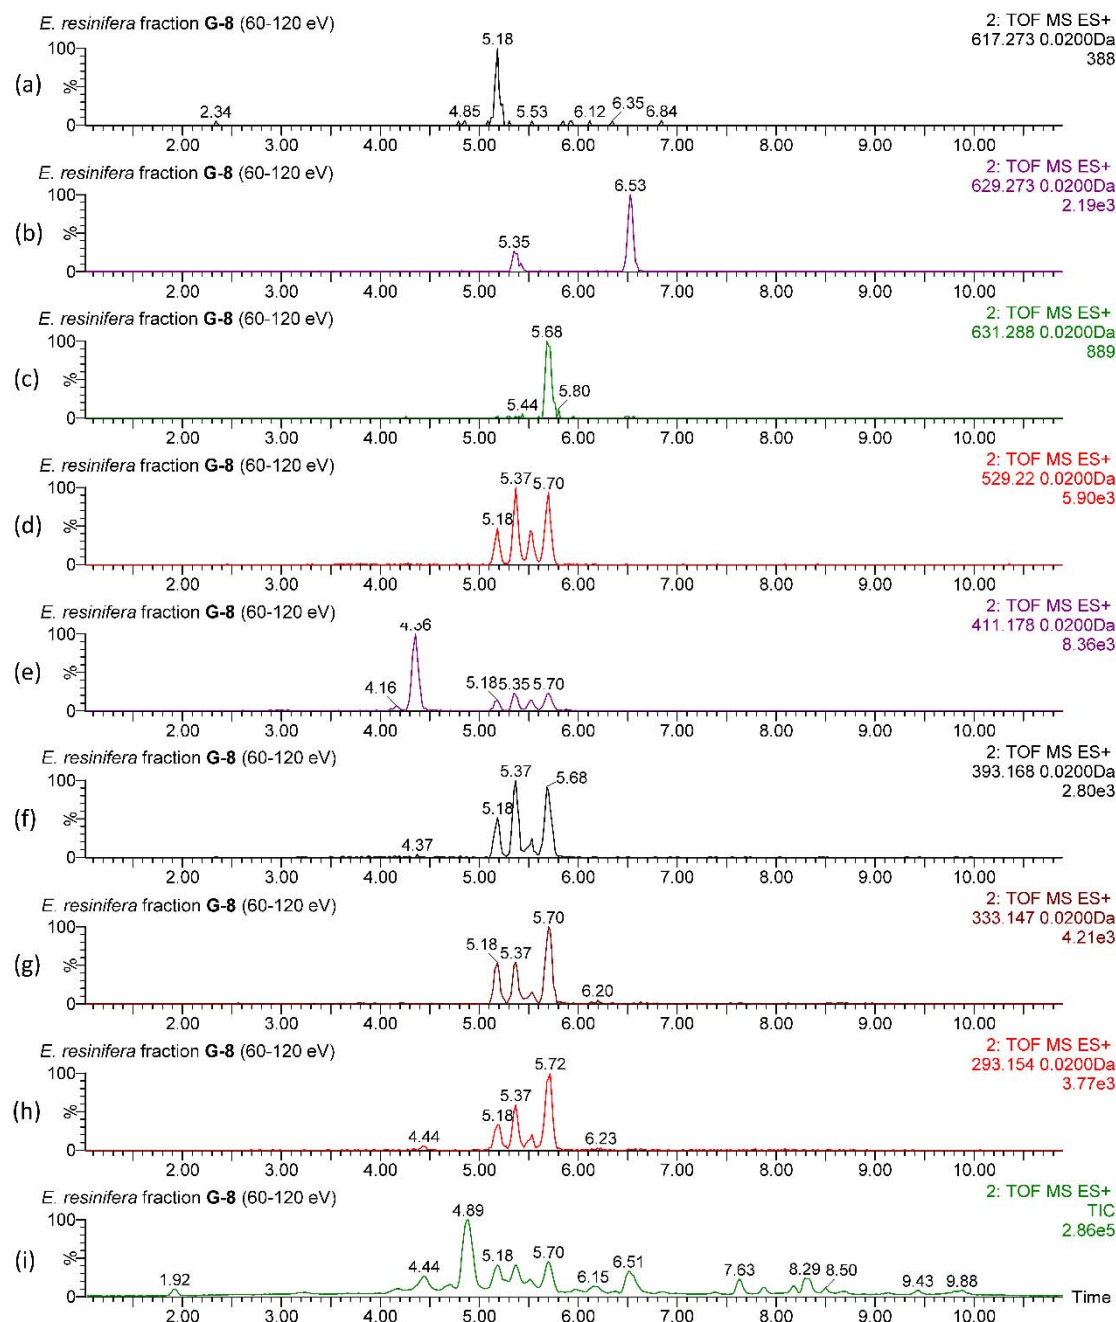

**Figure S38.** Total Ion Current (TIC) and eXtracted Ion Chromatograms (XICs), at selected  $m/z$  previously observed in high energy HRMS<sup>E</sup> of 12-deoxy-16-hydroxyphorbol 20-acetate-13,16-diacyl derivatives, obtained from UHPLC-HRMS<sup>E</sup> experiments for chromatographic fraction G-8 of *E. resinifera* (data acquired in ESI positive mode with a ramp trap collision energy of the high-energy function set at 60-120 eV; high-energy function (2: TOF MS ES<sup>+</sup>)). XIC for 12-deoxy-16-hydroxyphorbol 20-acetate-13,16-diacyl derivatives  $[M+Na]^+$  molecular ions: (a)  $m/z$  617.2727, calculated mass for C<sub>34</sub>H<sub>42</sub>O<sub>9</sub>Na (AcDPPI (4)); (b)  $m/z$  629.2727, calculated mass for C<sub>35</sub>H<sub>42</sub>O<sub>9</sub>Na (AcDPPT (5)); (c)  $m/z$  631.2883, calculated mass for C<sub>35</sub>H<sub>44</sub>O<sub>9</sub>Na (AcDPPU<sub>3</sub> (21)). XICs for selected characteristic ions of 16-hydroxy-12-deoxyphorbol 20-acetate-13,16-diacyl derivatives HRMS<sup>E</sup> spectra (see Scheme 2 and Figure S22) at (d)  $m/z$  529.2202, (e)  $m/z$  411.1784, (f)  $m/z$  393.1678, (g)  $m/z$  333.1467 and (h)  $m/z$  293.1542. (i) TIC of UHPLC-HRMS<sup>E</sup> chromatographic profile of fraction G-8 from *E. resinifera* extract.

## Supplementary Material

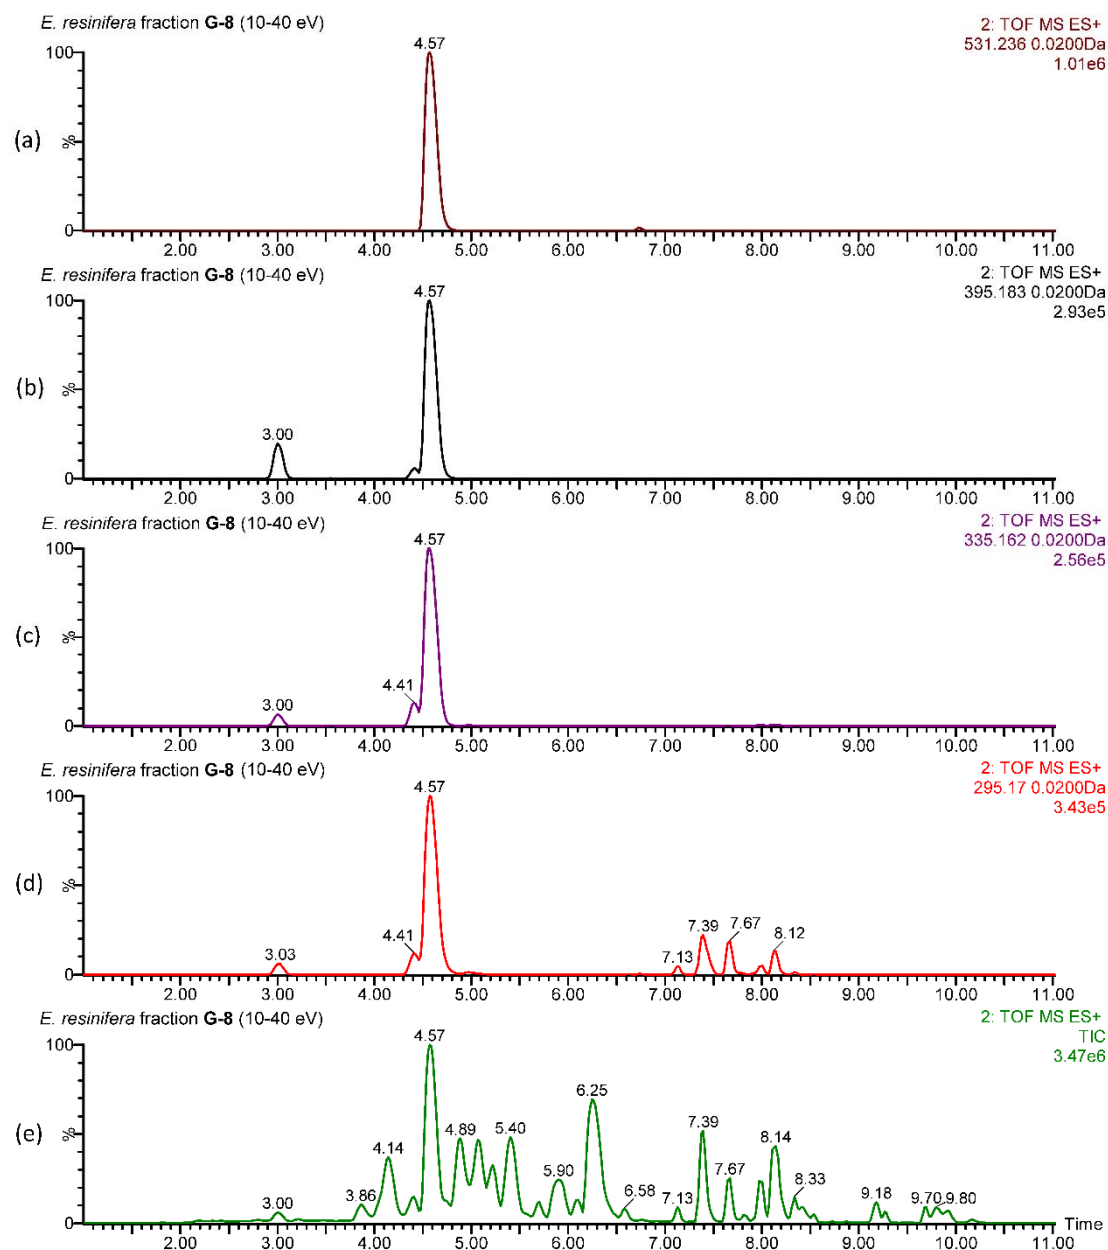

**Figure S39.** Total Ion Current (TIC) and eXtracted Ion Chromatograms (XICs), at selected  $m/z$  previously observed in high energy HRMS<sup>E</sup> of 12-deoxyphorbol 20-acetate-13-acyl derivatives, obtained from UHPLC-HRMS<sup>E</sup> experiments for chromatographic fraction G-8 of *E. resinifera* (data acquired in ESI positive mode with a ramp trap collision energy of the high-energy function set at 10-40 eV; high-energy function (2: TOF MS ES+)). XIC for 12-deoxyphorbol 20-acetate-13-phenylacetate (AcDPP (**12**))  $[M+Na]^+$  molecular ion: (a)  $m/z$  531.2359 calculated mass for  $C_{30}H_{36}O_7Na$ . XICs for selected featured ions of 12-deoxyphorbol 20-acetate-13-acyl derivatives HRMS<sup>E</sup> spectra (see Scheme 4 and Figure S29) at: (b)  $m/z$  395.1834; (c)  $m/z$  335.1623; (d)  $m/z$  295.1698. (e) UHPLC-HRMS<sup>E</sup> chromatographic profile (TIC) of fraction G-8 from *E. resinifera* extract.

## Supplementary Material

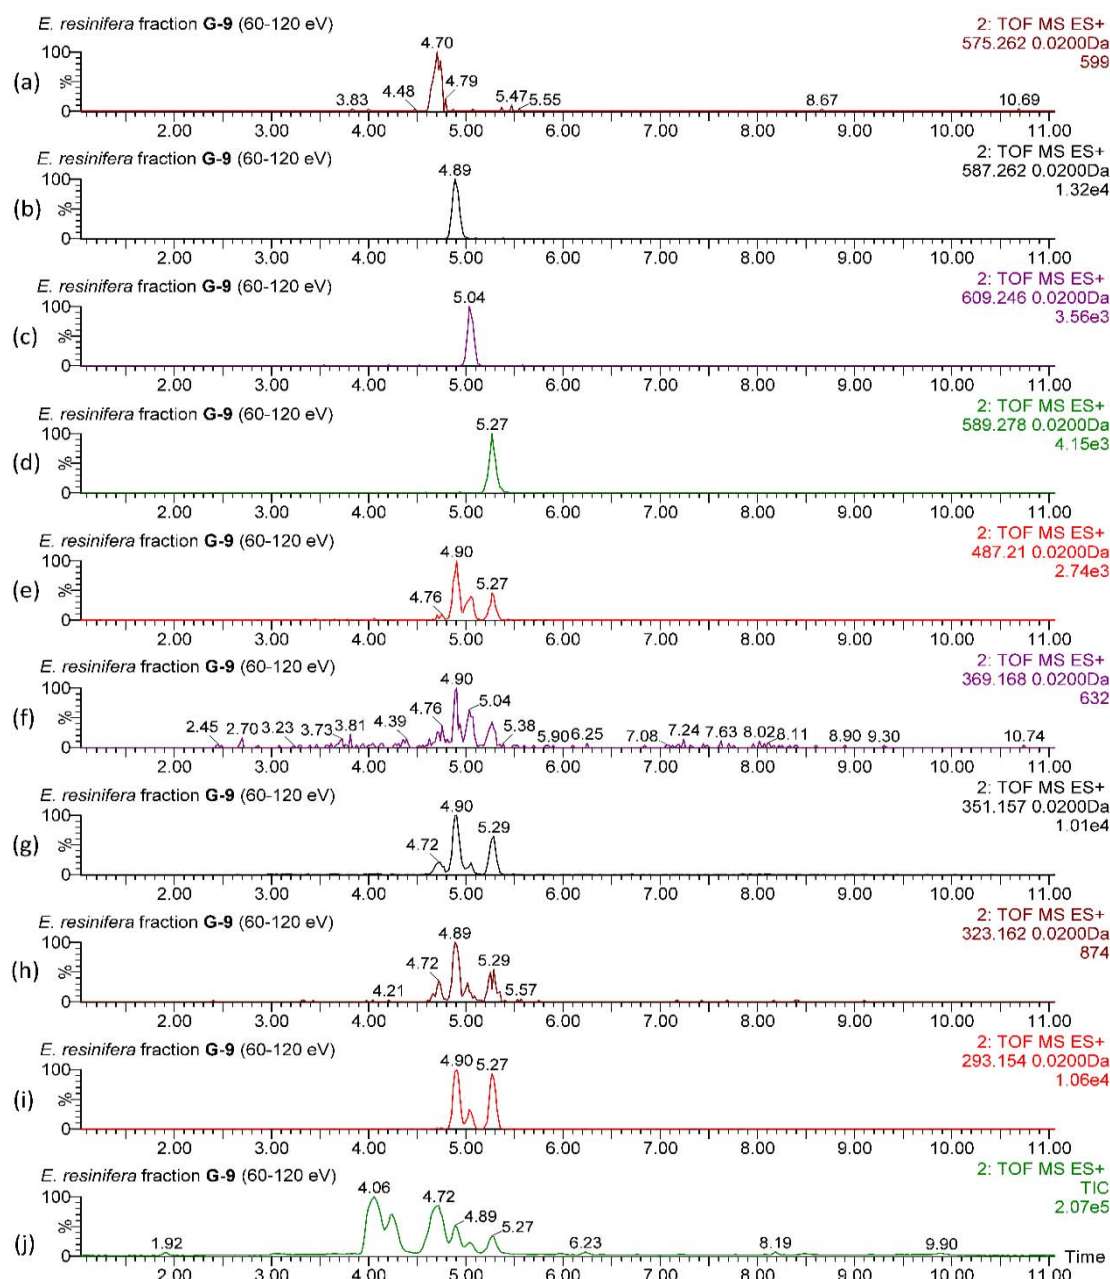

**Figure S40.** Total Ion Current (TIC) and eXtracted Ion Chromatograms (XICs), at selected  $m/z$  previously observed in high energy HRMS<sup>E</sup> of 12-deoxy-16-hydroxyphorbol 13,16-diacyl derivatives, obtained from UHPLC-HRMS<sup>E</sup> experiments for chromatographic fraction G-9 of *E. resinifera* (data acquired in ESI positive mode with a ramp trap collision energy of the high-energy function set at 60-120 eV; high-energy function (2: TOF MS ES<sup>+</sup>)). XIC for 12-deoxy-16-hydroxyphorbol 13,16-diacyl derivatives  $[M+Na]^+$  molecular ions: (a)  $m/z$  575.2621, calculated mass for C<sub>32</sub>H<sub>40</sub>O<sub>8</sub>Na (DPPI (1)); (b)  $m/z$  587.2621, calculated mass for C<sub>33</sub>H<sub>40</sub>O<sub>8</sub>Na (DPPT (2)); (c)  $m/z$  609.2464, calculated mass for C<sub>35</sub>H<sub>38</sub>O<sub>8</sub>Na (DPPBz (3)); (d)  $m/z$  589.2777, calculated mass for C<sub>33</sub>H<sub>42</sub>O<sub>8</sub>Na (DPPU<sub>1</sub> (19)). XICs for selected characteristic ions of 12-deoxy-16-hydroxyphorbol 13,16-diacyl derivatives HRMS<sup>E</sup> spectra (see Scheme 1 and Figure S20) at (e)  $m/z$  487.2097, (f)  $m/z$  369.1678, (g)  $m/z$  351.1572, (h)  $m/z$  323.1623 and (i)  $m/z$  293.1542. (j) TIC of UHPLC-HRMS<sup>E</sup> chromatographic profile of fraction G-9 from *E. resinifera* extract.

## Supplementary Material

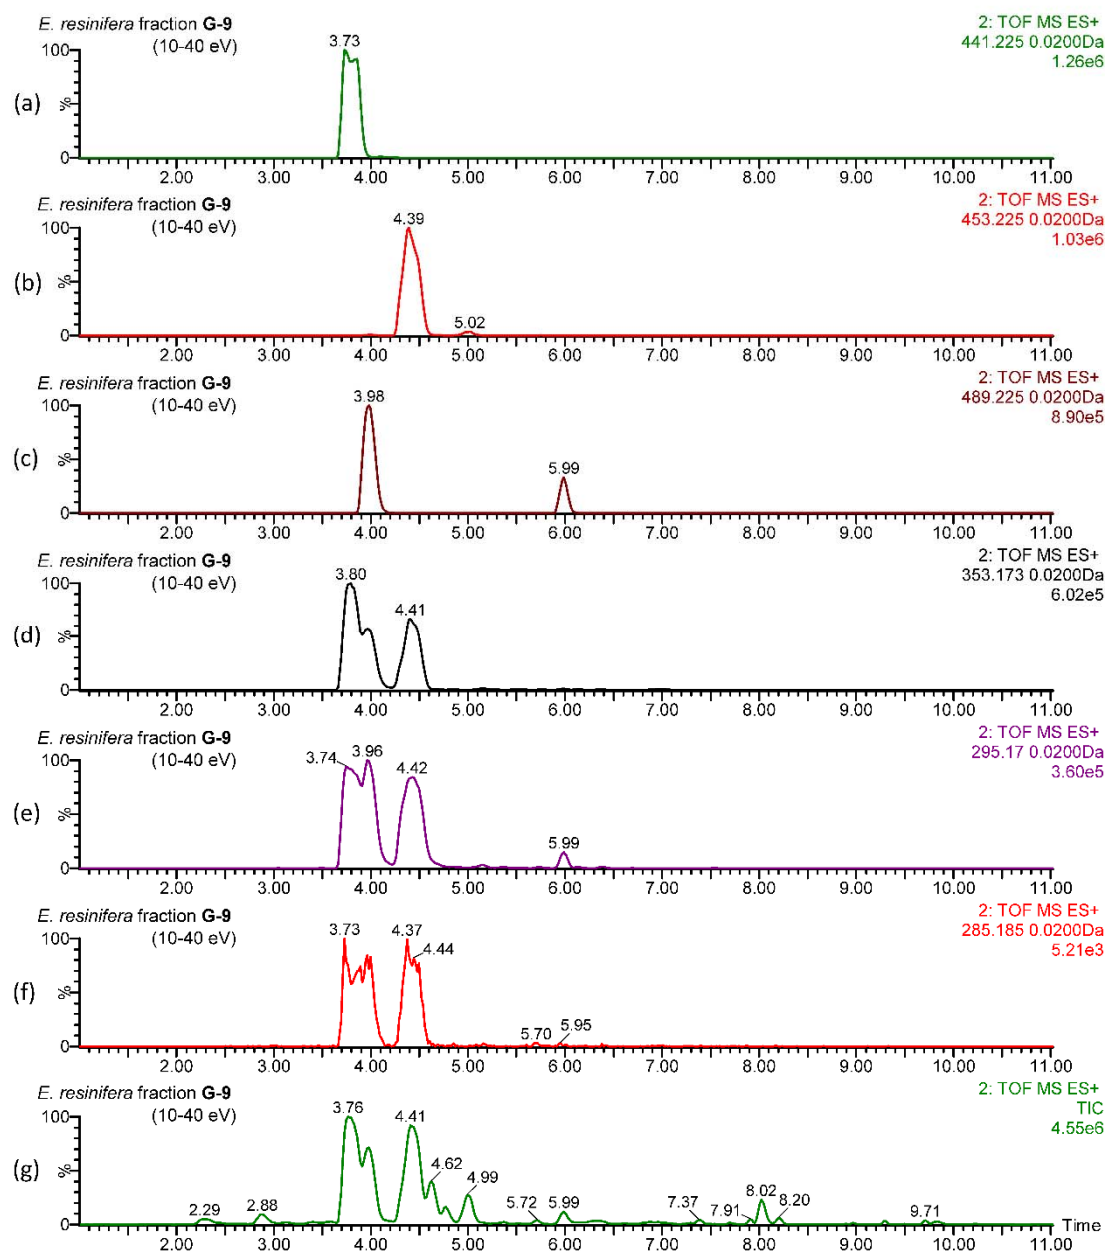

**Figure S41.** Total Ion Current (TIC) and eXtracted Ion Chromatograms (XICs), at selected  $m/z$  previously observed in high energy HRMS<sup>E</sup> of 12-deoxyphorbol 13-acyl derivatives, obtained from UHPLC-HRMS<sup>E</sup> experiments for chromatographic fraction G-9 of *E. resinifera* (data acquired in ESI positive mode with a ramp trap collision energy of the high-energy function set at 10-40 eV; high-energy function (2: TOF MS ES+)). XICs for 12-deoxyphorbol 13-acyl derivatives  $[M+Na]^+$  molecular ions: (a)  $m/z$  441.2253 calculated mass for C<sub>24</sub>H<sub>34</sub>O<sub>6</sub>Na (DPB (7)); (b)  $m/z$  453.2253 calculated mass for C<sub>25</sub>H<sub>34</sub>O<sub>6</sub>Na (DPA (8)) and (c)  $m/z$  489.2253, calculated mass for C<sub>28</sub>H<sub>34</sub>O<sub>6</sub>Na (DPP (9)). XICs for selected featured ions of 12-deoxyphorbol 13-acyl derivatives HRMS<sup>E</sup> spectra (see Scheme 3 and Figure S25) at: (d)  $m/z$  395.1834; (e)  $m/z$  335.1623; (f)  $m/z$  295.1698. (g) UHPLC-HRMS<sup>E</sup> chromatographic profile (TIC) of fraction from *E. resinifera* extract.

## Supplementary Material

### 4- UHPLC-HRMS<sup>E</sup> data. Tables.

**Table S1.** Selected ions of high energy HRMS<sup>E</sup> experiment (DIA) [1], of DPPI (1) and DPPT (2) (data acquired in ESI positive ionization with a ramp trap collision energy of the high-energy function set at 60-120 eV).

| Compound | Observed m/z (%) | Calculated m/z | $\Delta m$ (mDa) | Elemental composition                             | Annotation                                                                                                            |
|----------|------------------|----------------|------------------|---------------------------------------------------|-----------------------------------------------------------------------------------------------------------------------|
| DPPI (1) | 575.2619 (18)    | 575.2621       | -0.2             | C <sub>32</sub> H <sub>40</sub> O <sub>8</sub> Na | [M+Na] <sup>+</sup>                                                                                                   |
|          | 487.2097 (13)    | 487.2097       | 0.0              | C <sub>28</sub> H <sub>32</sub> O <sub>6</sub> Na | [M-C <sub>4</sub> H <sub>8</sub> O <sub>2</sub> +Na] <sup>+</sup>                                                     |
|          | 439.2099 (44)    | 439.2097       | +0.2             | C <sub>24</sub> H <sub>32</sub> O <sub>6</sub> Na | [M-C <sub>8</sub> H <sub>8</sub> O <sub>2</sub> +Na] <sup>+</sup>                                                     |
|          | 369.1688 (3)     | 369.1678       | +1.0             | C <sub>20</sub> H <sub>26</sub> O <sub>5</sub> Na | [M-C <sub>8</sub> H <sub>8</sub> O <sub>2</sub> -C <sub>4</sub> H <sub>6</sub> O+Na] <sup>+</sup>                     |
|          | 351.1575 (32)    | 351.1572       | +0.3             | C <sub>20</sub> H <sub>24</sub> O <sub>4</sub> Na | [M-C <sub>8</sub> H <sub>8</sub> O <sub>2</sub> -C <sub>4</sub> H <sub>6</sub> O-H <sub>2</sub> O+Na] <sup>+</sup>    |
|          | 323.1627 (8)     | 323.1623       | +0.4             | C <sub>19</sub> H <sub>24</sub> O <sub>3</sub> Na | [M-C <sub>8</sub> H <sub>8</sub> O <sub>2</sub> -C <sub>4</sub> H <sub>6</sub> O-H <sub>2</sub> O-CO+Na] <sup>+</sup> |
|          | 311.1651 (12)    | 311.1647       | +0.4             | C <sub>20</sub> H <sub>23</sub> O <sub>3</sub>    | [M-C <sub>8</sub> H <sub>8</sub> O <sub>2</sub> -C <sub>4</sub> H <sub>6</sub> O-2H <sub>2</sub> O+H] <sup>+</sup>    |
|          | 293.1542 (100)   | 293.1542       | 0.0              | C <sub>20</sub> H <sub>21</sub> O <sub>2</sub>    | [M-C <sub>8</sub> H <sub>8</sub> O <sub>2</sub> -C <sub>4</sub> H <sub>6</sub> O-3H <sub>2</sub> O+H] <sup>+</sup>    |
|          | 275.1434 (23)    | 275.1436       | -0.2             | C <sub>20</sub> H <sub>19</sub> O                 | [M-C <sub>8</sub> H <sub>8</sub> O <sub>2</sub> -C <sub>4</sub> H <sub>6</sub> O-4H <sub>2</sub> O+H] <sup>+</sup>    |
|          | 265.1588 (25)    | 265.1592       | -0.4             | C <sub>19</sub> H <sub>21</sub> O                 | [M-C <sub>8</sub> H <sub>8</sub> O <sub>2</sub> -C <sub>4</sub> H <sub>6</sub> O-3H <sub>2</sub> O-CO+H] <sup>+</sup> |
|          | 247.1484 (23)    | 247.1487       | -0.3             | C <sub>19</sub> H <sub>19</sub>                   | [M-C <sub>8</sub> H <sub>8</sub> O <sub>2</sub> -C <sub>4</sub> H <sub>6</sub> O-4H <sub>2</sub> O-CO+H] <sup>+</sup> |
| DPPT (2) | 587.2639 (53)    | 587.2621       | +1.8             | C <sub>33</sub> H <sub>40</sub> O <sub>8</sub> Na | [M+Na] <sup>+</sup>                                                                                                   |
|          | 487.2113 (9)     | 487.2097       | +1.6             | C <sub>28</sub> H <sub>32</sub> O <sub>6</sub> Na | [M-C <sub>5</sub> H <sub>8</sub> O <sub>2</sub> +Na] <sup>+</sup>                                                     |
|          | 451.2114 (26)    | 451.2097       | +1.7             | C <sub>25</sub> H <sub>32</sub> O <sub>6</sub> Na | [M-C <sub>8</sub> H <sub>8</sub> O <sub>2</sub> +Na] <sup>+</sup>                                                     |
|          | 369.1700 (1)     | 369.1678       | +2.2             | C <sub>20</sub> H <sub>26</sub> O <sub>5</sub> Na | [M-C <sub>8</sub> H <sub>8</sub> O <sub>2</sub> -C <sub>5</sub> H <sub>6</sub> O+Na] <sup>+</sup>                     |
|          | 351.1584 (25)    | 351.1572       | +1.2             | C <sub>20</sub> H <sub>24</sub> O <sub>4</sub> Na | [M-C <sub>8</sub> H <sub>8</sub> O <sub>2</sub> -C <sub>5</sub> H <sub>6</sub> O-H <sub>2</sub> O+Na] <sup>+</sup>    |
|          | 323.1636 (4)     | 323.1623       | +1.3             | C <sub>19</sub> H <sub>24</sub> O <sub>3</sub> Na | [M-C <sub>8</sub> H <sub>8</sub> O <sub>2</sub> -C <sub>5</sub> H <sub>6</sub> O-H <sub>2</sub> O-CO+Na] <sup>+</sup> |
|          | 311.1654 (8)     | 311.1647       | +0.7             | C <sub>20</sub> H <sub>23</sub> O <sub>3</sub>    | [M-C <sub>8</sub> H <sub>8</sub> O <sub>2</sub> -C <sub>5</sub> H <sub>6</sub> O-2H <sub>2</sub> O+H] <sup>+</sup>    |
|          | 293.1551 (100)   | 293.1542       | +0.9             | C <sub>20</sub> H <sub>21</sub> O <sub>2</sub>    | [M-C <sub>8</sub> H <sub>8</sub> O <sub>2</sub> -C <sub>5</sub> H <sub>6</sub> O-3H <sub>2</sub> O+H] <sup>+</sup>    |
|          | 275.1442 (21)    | 275.1436       | +0.6             | C <sub>20</sub> H <sub>19</sub> O                 | [M-C <sub>8</sub> H <sub>8</sub> O <sub>2</sub> -C <sub>5</sub> H <sub>6</sub> O-4H <sub>2</sub> O+H] <sup>+</sup>    |
|          | 265.1597 (19)    | 265.1592       | +0.5             | C <sub>19</sub> H <sub>21</sub> O                 | [M-C <sub>8</sub> H <sub>8</sub> O <sub>2</sub> -C <sub>5</sub> H <sub>6</sub> O-3H <sub>2</sub> O-CO+H] <sup>+</sup> |
|          | 247.1493 (20)    | 247.1487       | +0.6             | C <sub>19</sub> H <sub>19</sub>                   | [M-C <sub>8</sub> H <sub>8</sub> O <sub>2</sub> -C <sub>5</sub> H <sub>6</sub> O-4H <sub>2</sub> O-CO+H] <sup>+</sup> |



## Supplementary Material

**Table S2.** Selected ions of high energy HRMS<sup>E</sup> experiment (DIA) [1], of DPB (7), DPA (8) and DPP (9) (data acquired in ESI positive ionization with a ramp trap collision energy of the high-energy function set at 10-40 eV).

| Compound | Observed m/z (%) | Calculated m/z | $\Delta m$ (mDa) | Elemental composition                             | Annotation                                                                            |
|----------|------------------|----------------|------------------|---------------------------------------------------|---------------------------------------------------------------------------------------|
| DPB (7)  | 441.2264 (100)   | 441.2253       | +1.1             | C <sub>24</sub> H <sub>34</sub> O <sub>6</sub> Na | [M+Na] <sup>+</sup>                                                                   |
|          | 353.1737 (47)    | 353.1729       | 0.8              | C <sub>20</sub> H <sub>26</sub> O <sub>4</sub> Na | [M-C <sub>4</sub> H <sub>8</sub> O <sub>2</sub> +Na] <sup>+</sup>                     |
|          | 313.1807 (4)     | 313.1804       | +0.3             | C <sub>20</sub> H <sub>25</sub> O <sub>3</sub>    | [M-C <sub>4</sub> H <sub>8</sub> O <sub>2</sub> -H <sub>2</sub> O+H] <sup>+</sup>     |
|          | 295.1701 (25)    | 295.1698       | +0.3             | C <sub>20</sub> H <sub>23</sub> O <sub>2</sub>    | [M-C <sub>4</sub> H <sub>8</sub> O <sub>2</sub> -2H <sub>2</sub> O+H] <sup>+</sup>    |
|          | 285.1856 (0.3)   | 285.1855       | +0.1             | C <sub>19</sub> H <sub>25</sub> O <sub>2</sub>    | [M-C <sub>4</sub> H <sub>8</sub> O <sub>2</sub> -H <sub>2</sub> O-CO+H] <sup>+</sup>  |
|          | 277.1594 (7)     | 277.1592       | +0.2             | C <sub>20</sub> H <sub>21</sub> O                 | [M-C <sub>4</sub> H <sub>8</sub> O <sub>2</sub> -3H <sub>2</sub> O+H] <sup>+</sup>    |
|          | 267.1750 (7)     | 267.1749       | +0.1             | C <sub>19</sub> H <sub>23</sub> O                 | [M-C <sub>4</sub> H <sub>8</sub> O <sub>2</sub> -2H <sub>2</sub> O-CO+H] <sup>+</sup> |
|          | 249.1644 (1)     | 249.1643       | +0.1             | C <sub>19</sub> H <sub>21</sub>                   | [M-C <sub>4</sub> H <sub>8</sub> O <sub>2</sub> -3H <sub>2</sub> O-CO+H] <sup>+</sup> |
| DPA (8)  | 453.2273 (100)   | 453.2253       | +2.0             | C <sub>25</sub> H <sub>34</sub> O <sub>6</sub> Na | [M+Na] <sup>+</sup>                                                                   |
|          | 353.1744 (39)    | 353.1729       | +1.5             | C <sub>20</sub> H <sub>26</sub> O <sub>4</sub> Na | [M-C <sub>5</sub> H <sub>8</sub> O <sub>2</sub> +Na] <sup>+</sup>                     |
|          | 313.1816 (6)     | 313.1804       | +1.2             | C <sub>20</sub> H <sub>25</sub> O <sub>3</sub>    | [M-C <sub>5</sub> H <sub>8</sub> O <sub>2</sub> -H <sub>2</sub> O+H] <sup>+</sup>     |
|          | 295.1708 (24)    | 295.1698       | +1.0             | C <sub>20</sub> H <sub>23</sub> O <sub>2</sub>    | [M-C <sub>5</sub> H <sub>8</sub> O <sub>2</sub> -2H <sub>2</sub> O+H] <sup>+</sup>    |
|          | 285.1857 (0.4)   | 285.1855       | +0.2             | C <sub>19</sub> H <sub>25</sub> O <sub>2</sub>    | [M-C <sub>5</sub> H <sub>8</sub> O <sub>2</sub> -H <sub>2</sub> O-CO+H] <sup>+</sup>  |
|          | 277.1602 (5)     | 277.1592       | +1.0             | C <sub>20</sub> H <sub>21</sub> O                 | [M-C <sub>5</sub> H <sub>8</sub> O <sub>2</sub> -3H <sub>2</sub> O+H] <sup>+</sup>    |
|          | 267.1757 (6)     | 267.1749       | +0.8             | C <sub>19</sub> H <sub>23</sub> O                 | [M-C <sub>5</sub> H <sub>8</sub> O <sub>2</sub> -2H <sub>2</sub> O-CO+H] <sup>+</sup> |
|          | 249.1646 (1)     | 249.1643       | +0.3             | C <sub>19</sub> H <sub>21</sub>                   | [M-C <sub>5</sub> H <sub>8</sub> O <sub>2</sub> -3H <sub>2</sub> O-CO+H] <sup>+</sup> |
| DPP (9)  | 489.2280 (100)   | 489.2253       | +2.7             | C <sub>28</sub> H <sub>34</sub> O <sub>6</sub> Na | [M+Na] <sup>+</sup>                                                                   |
|          | 353.1745 (34)    | 353.1729       | +1.6             | C <sub>20</sub> H <sub>26</sub> O <sub>4</sub> Na | [M-C <sub>8</sub> H <sub>8</sub> O <sub>2</sub> +Na] <sup>+</sup>                     |
|          | 313.1818 (22)    | 313.1804       | +1.4             | C <sub>20</sub> H <sub>25</sub> O <sub>3</sub>    | [M-C <sub>8</sub> H <sub>8</sub> O <sub>2</sub> -H <sub>2</sub> O+H] <sup>+</sup>     |
|          | 295.1709 (37)    | 295.1698       | +1.1             | C <sub>20</sub> H <sub>23</sub> O <sub>2</sub>    | [M-C <sub>8</sub> H <sub>8</sub> O <sub>2</sub> -2H <sub>2</sub> O+H] <sup>+</sup>    |
|          | 285.1858 (0.5)   | 285.1855       | +0.3             | C <sub>19</sub> H <sub>25</sub> O <sub>2</sub>    | [M-C <sub>8</sub> H <sub>8</sub> O <sub>2</sub> -H <sub>2</sub> O-CO+H] <sup>+</sup>  |
|          | 277.1599 (4)     | 277.1592       | +0.7             | C <sub>20</sub> H <sub>21</sub> O                 | [M-C <sub>8</sub> H <sub>8</sub> O <sub>2</sub> -3H <sub>2</sub> O+H] <sup>+</sup>    |
|          | 267.1756 (6)     | 267.1749       | +0.7             | C <sub>19</sub> H <sub>23</sub> O                 | [M-C <sub>8</sub> H <sub>8</sub> O <sub>2</sub> -2H <sub>2</sub> O-CO+H] <sup>+</sup> |
|          | 249.1657 (0.3)   | 249.1643       | +1.4             | C <sub>19</sub> H <sub>21</sub>                   | [M-C <sub>8</sub> H <sub>8</sub> O <sub>2</sub> -3H <sub>2</sub> O-CO+H] <sup>+</sup> |

### Supplementary Material

**Table S3.** Selected ions of high energy HRMS<sup>E</sup> experiment (DIA) [1], of AcDPB (**10**), AcDPA (**11**) and AcDPP (**12**) (data acquired in ESI positive ionization with a ramp trap collision energy of the high-energy function set at 10-40 eV).

| Compound            | Observed m/z (%) | Calculated m/z | $\Delta m$ (mDa) | Elemental composition                             | Annotation                                                                                                        |
|---------------------|------------------|----------------|------------------|---------------------------------------------------|-------------------------------------------------------------------------------------------------------------------|
| AcDPB ( <b>10</b> ) | 483.2366 (100)   | 483.2359       | +0.7             | C <sub>26</sub> H <sub>36</sub> O <sub>7</sub> Na | [M+Na] <sup>+</sup>                                                                                               |
|                     | 395.1841 (29)    | 395.1834       | +0.7             | C <sub>22</sub> H <sub>28</sub> O <sub>5</sub> Na | [M-C <sub>4</sub> H <sub>8</sub> O <sub>2</sub> +Na] <sup>+</sup>                                                 |
|                     | 355.1908 (0.1)   | 355.1909       | -0.1             | C <sub>22</sub> H <sub>27</sub> O <sub>4</sub>    | [M-C <sub>4</sub> H <sub>8</sub> O <sub>2</sub> -H <sub>2</sub> O+H] <sup>+</sup>                                 |
|                     | 335.1620 (62)    | 335.1623       | -0.3             | C <sub>20</sub> H <sub>24</sub> O <sub>3</sub> Na | [M-C <sub>4</sub> H <sub>8</sub> O <sub>2</sub> -AcOH+Na] <sup>+</sup>                                            |
|                     | 313.1810 (1)     | 313.1804       | +0.6             | C <sub>20</sub> H <sub>25</sub> O <sub>3</sub>    | [M-C <sub>4</sub> H <sub>8</sub> O <sub>2</sub> -H <sub>2</sub> O-C <sub>3</sub> H <sub>2</sub> O+H] <sup>+</sup> |
|                     | 295.1700 (28)    | 295.1698       | +0.2             | C <sub>20</sub> H <sub>23</sub> O <sub>2</sub>    | [M-C <sub>4</sub> H <sub>8</sub> O <sub>2</sub> -AcOH-H <sub>2</sub> O+H] <sup>+</sup>                            |
|                     | 277.1594 (9)     | 277.1592       | +0.2             | C <sub>20</sub> H <sub>21</sub> O                 | [M-C <sub>4</sub> H <sub>8</sub> O <sub>2</sub> -AcOH-2H <sub>2</sub> O+H] <sup>+</sup>                           |
|                     | 267.1750 (8)     | 267.1749       | +0.1             | C <sub>19</sub> H <sub>23</sub> O                 | [M-C <sub>4</sub> H <sub>8</sub> O <sub>2</sub> -AcOH-H <sub>2</sub> O-CO+H] <sup>+</sup>                         |
|                     | 249.1646 (1)     | 249.1643       | +0.3             | C <sub>19</sub> H <sub>21</sub>                   | [M-C <sub>4</sub> H <sub>8</sub> O <sub>2</sub> -AcOH-2H <sub>2</sub> O-CO+H] <sup>+</sup>                        |
| AcDPA ( <b>11</b> ) | 495.2363 (100)   | 495.2359       | +0.4             | C <sub>27</sub> H <sub>36</sub> O <sub>7</sub> Na | [M+Na] <sup>+</sup>                                                                                               |
|                     | 395.1839 (28)    | 395.1834       | +0.5             | C <sub>22</sub> H <sub>28</sub> O <sub>5</sub> Na | [M-C <sub>5</sub> H <sub>8</sub> O <sub>2</sub> +Na] <sup>+</sup>                                                 |
|                     | 355.1911 (0.2)   | 355.1909       | +0.2             | C <sub>22</sub> H <sub>27</sub> O <sub>4</sub>    | [M-C <sub>5</sub> H <sub>8</sub> O <sub>2</sub> -H <sub>2</sub> O+H] <sup>+</sup>                                 |
|                     | 335.1627 (51)    | 335.1623       | +0.4             | C <sub>20</sub> H <sub>24</sub> O <sub>3</sub> Na | [M-C <sub>5</sub> H <sub>8</sub> O <sub>2</sub> -AcOH+Na] <sup>+</sup>                                            |
|                     | 313.1803 (1)     | 313.1804       | -0.1             | C <sub>20</sub> H <sub>25</sub> O <sub>3</sub>    | [M-C <sub>5</sub> H <sub>8</sub> O <sub>2</sub> -H <sub>2</sub> O-C <sub>3</sub> H <sub>2</sub> O+H] <sup>+</sup> |
|                     | 295.1699 (29)    | 295.1698       | +0.1             | C <sub>20</sub> H <sub>23</sub> O <sub>2</sub>    | [M-C <sub>5</sub> H <sub>8</sub> O <sub>2</sub> -AcOH-H <sub>2</sub> O+H] <sup>+</sup>                            |
|                     | 277.1592 (8)     | 277.1592       | +0.0             | C <sub>20</sub> H <sub>21</sub> O                 | [M-C <sub>5</sub> H <sub>8</sub> O <sub>2</sub> -AcOH-2H <sub>2</sub> O+H] <sup>+</sup>                           |
|                     | 267.1749 (8)     | 267.1749       | +0.0             | C <sub>19</sub> H <sub>23</sub> O                 | [M-C <sub>5</sub> H <sub>8</sub> O <sub>2</sub> -AcOH-H <sub>2</sub> O-CO+H] <sup>+</sup>                         |
|                     | 249.1646 (1)     | 249.1643       | +0.3             | C <sub>19</sub> H <sub>21</sub>                   | [M-C <sub>5</sub> H <sub>8</sub> O <sub>2</sub> -AcOH-2H <sub>2</sub> O-CO+H] <sup>+</sup>                        |
| AcDPP ( <b>12</b> ) | 531.2363 (100)   | 531.2359       | +0.4             | C <sub>30</sub> H <sub>36</sub> O <sub>7</sub> Na | [M+Na] <sup>+</sup>                                                                                               |
|                     | 395.1840 (29)    | 395.1834       | +0.6             | C <sub>22</sub> H <sub>28</sub> O <sub>5</sub> Na | [M-C <sub>8</sub> H <sub>8</sub> O <sub>2</sub> +Na] <sup>+</sup>                                                 |
|                     | 355.1912 (0.6)   | 355.1909       | +0.3             | C <sub>22</sub> H <sub>27</sub> O <sub>4</sub>    | [M-C <sub>8</sub> H <sub>8</sub> O <sub>2</sub> -H <sub>2</sub> O+H] <sup>+</sup>                                 |
|                     | 335.1627 (25)    | 335.1623       | +0.4             | C <sub>20</sub> H <sub>24</sub> O <sub>3</sub> Na | [M-C <sub>8</sub> H <sub>8</sub> O <sub>2</sub> -AcOH+Na] <sup>+</sup>                                            |
|                     | 313.1809 (1)     | 313.1804       | +0.5             | C <sub>20</sub> H <sub>25</sub> O <sub>3</sub>    | [M-C <sub>8</sub> H <sub>8</sub> O <sub>2</sub> -H <sub>2</sub> O-C <sub>3</sub> H <sub>2</sub> O+H] <sup>+</sup> |
|                     | 295.1699 (29)    | 295.1698       | +0.1             | C <sub>20</sub> H <sub>23</sub> O <sub>2</sub>    | [M-C <sub>8</sub> H <sub>8</sub> O <sub>2</sub> -AcOH-H <sub>2</sub> O+H] <sup>+</sup>                            |
|                     | 277.1593 (7)     | 277.1592       | +0.1             | C <sub>20</sub> H <sub>21</sub> O                 | [M-C <sub>8</sub> H <sub>8</sub> O <sub>2</sub> -AcOH-2H <sub>2</sub> O+H] <sup>+</sup>                           |
|                     | 267.1750 (6)     | 267.1749       | +0.1             | C <sub>19</sub> H <sub>23</sub> O                 | [M-C <sub>8</sub> H <sub>8</sub> O <sub>2</sub> -AcOH-H <sub>2</sub> O-CO+H] <sup>+</sup>                         |
|                     | 249.1639 (1)     | 249.1643       | -0.4             | C <sub>19</sub> H <sub>21</sub>                   | [M-C <sub>8</sub> H <sub>8</sub> O <sub>2</sub> -AcOH-2H <sub>2</sub> O-CO+H] <sup>+</sup>                        |



## ***Supplementary Material***

### **References**

1. Plumb, R.S.; Johnson, K.A.; Rainville, P.; Smith, B.W.; Wilson, I.D.; Castro-Perez, J.M.; Nicholson, J.K. UPLC/MSE; a new approach for generating molecular fragment information for biomarker structure elucidation. *Rapid Commun. Mass Spectrom.* **2006**, *20*, 1989–1994, doi:<https://doi.org/10.1002/rcm.2550>.
